# Supplementary material for: Role of diet in type 2 diabetes incidence: umbrella review of meta-analyses of prospective observational studies
Source: PubMed Central journal article supplement — BMJ. 2019 Jul 3;366:l2368. doi: 10.1136/bmj.l2368 (PMC6607211; doi:10.1136/bmj.l2368), 2019-07-03
Supplement: neum045372.ww.pdf [file neum045372.ww.pdf]

## **Supplement**

### **Title: The role of diet in the prevention of diabetes: An umbrella review of meta-analyses of observational and interventional studies**

Neuenschwander M<sup>1</sup>, *doctoral researcher*, Ballon A<sup>1</sup>, *master student*, Weber KS<sup>2,3</sup>, *postdoctoral researcher*, Norat T<sup>5</sup>, *principal research fellow*, Aune D<sup>4,5,6</sup>, *postdoctoral researcher and associate professor*, Schwingshackl L<sup>7,8</sup>, *postdoctoral researcher*, Schlesinger S<sup>1,3</sup>, *senior research associate*

<sup>1</sup> Institute for Biometrics and Epidemiology, German Diabetes Center, Leibniz Center for Diabetes Research at Heinrich Heine University Düsseldorf, D-40225 Düsseldorf, Germany

<sup>2</sup> Institute for Clinical Diabetology, German Diabetes Center, Leibniz Center for Diabetes Research at Heinrich Heine University Düsseldorf, D-40225 Düsseldorf, Germany

<sup>3</sup> German Center for Diabetes Research (DZD), D-85764 München-Neuherberg, Germany

<sup>4</sup> Department of Epidemiology and Biostatistics, Imperial College London, UK-SW7 2AZ London, United Kingdom

<sup>5</sup> Department of Nutrition, Bjørknes University College, N-0456 Oslo, Norway

<sup>6</sup> Department of Endocrinology, Morbid Obesity and Preventive Medicine, Oslo University Hospital, N-0456 Oslo, Norway

<sup>7</sup> Institute for Evidence in Medicine, Faculty of Medicine and Medical Center – University of Freiburg, D-79110 Freiburg, Germany

<sup>8</sup> Department of Epidemiology, German Institute of Human Nutrition Potsdam-Rehbruecke (DIfE), D.14558 Nuthetal

### **Correspondence to:**

Sabrina Schlesinger (PhD), Institute for Biometry and Epidemiology, German Diabetes Center, Auf'm Hennekamp 65, 40225 Düsseldorf, Germany. Phone: +49 211 3382 231. Email:

[sabrina.schlesinger@ddz.uni-duesseldorf.de](mailto:sabrina.schlesinger@ddz.uni-duesseldorf.de) ORCID-ID: 0000-0003-4244-0832

**Keywords** type 2 diabetes, diet, nutrition, dietary pattern, dietary behaviour, food group, food, beverage, macronutrient, micronutrient, umbrella review

**Supplementary Table 1: Search term**

|                                                                                                                                                                                                                                                                                                                                                                                                                                                                                                                                                                                                                                                                                                                                                                                                                                                                                                                                                                                        |
|----------------------------------------------------------------------------------------------------------------------------------------------------------------------------------------------------------------------------------------------------------------------------------------------------------------------------------------------------------------------------------------------------------------------------------------------------------------------------------------------------------------------------------------------------------------------------------------------------------------------------------------------------------------------------------------------------------------------------------------------------------------------------------------------------------------------------------------------------------------------------------------------------------------------------------------------------------------------------------------|
| ((diet OR dietetic OR diets OR dietary) OR (nutrition OR nutrient) OR (food OR food group OR food cluster) OR beverage) OR (bread OR cereal OR grain OR corn OR wholegrain OR soy OR soya OR whole wheat OR potatoes OR granary OR tuber OR tubers OR pulses OR legumes OR lentils OR beans OR chickpeas OR rice OR pasta OR quinoa OR vegetable OR vegetables OR fruit OR fruits OR milk OR dairy OR dairy products OR yoghurt OR cheese OR egg OR eggs OR meat OR pork OR lamb OR chicken OR beef OR turkey OR duck OR fish OR seafood OR shellfish OR oil OR butter OR margarine OR nut OR nuts OR desert OR sweets OR sweetened OR candy OR sugar*) OR (alcohol OR caffeine OR coffee OR tea OR juice OR beer OR lemonade OR drinks OR drinking OR wine OR liquor OR "sugar sweetened beverage") OR (macronutrient* OR fat OR "fatty acids" OR carbohydrate* OR fibre OR fiber OR starch OR sugar OR fructose OR protein) OR ((micronutrient* OR vitamin* OR mineral OR minerals)) |
| AND                                                                                                                                                                                                                                                                                                                                                                                                                                                                                                                                                                                                                                                                                                                                                                                                                                                                                                                                                                                    |
| (diabetes)                                                                                                                                                                                                                                                                                                                                                                                                                                                                                                                                                                                                                                                                                                                                                                                                                                                                                                                                                                             |
| AND                                                                                                                                                                                                                                                                                                                                                                                                                                                                                                                                                                                                                                                                                                                                                                                                                                                                                                                                                                                    |
| ("systematic review" OR meta-analysis)                                                                                                                                                                                                                                                                                                                                                                                                                                                                                                                                                                                                                                                                                                                                                                                                                                                                                                                                                 |

**Supplementary Table 2: List of excluded studies**

| Reason for exclusion                                                            |
|---------------------------------------------------------------------------------|
| Not relevant outcome <sup>1-25</sup>                                            |
| Not relevant exposure <sup>26-41</sup>                                          |
| Meta-analyses of studies other than prospective cohort studies <sup>42-45</sup> |
| No meta-analysis <sup>46-102</sup>                                              |
| No systematic literature search <sup>103-107</sup>                              |
| Abstract <sup>108-135</sup>                                                     |
| Duplicate <sup>136-139</sup>                                                    |
| Comment <sup>140-145</sup>                                                      |
| Protocol <sup>146-149</sup>                                                     |
| Editorial <sup>150</sup>                                                        |
| Meta-analysis on the same topic <sup>151-217</sup>                              |

**Supplemental Table 3: Characteristics of the conducted meta-analyses and results of the recalculation, the methodological assessment (AMSTAR) and the assessment of quality of evidence (NutriGrade) by exposure**

| Exposure                                       | Reference                         | No. of primary studies | Comparison    | Range / Amount                      | No. of participants / No. of cases | SHR (95%-CI)        | p-value | I <sup>2</sup> | τ <sup>2</sup> | 95%-PI           | Egger's p-value | AMSTAR | NutriGrade |
|------------------------------------------------|-----------------------------------|------------------------|---------------|-------------------------------------|------------------------------------|---------------------|---------|----------------|----------------|------------------|-----------------|--------|------------|
| <b>Dietary behaviours/diet quality indices</b> |                                   |                        |               |                                     |                                    |                     |         |                |                |                  |                 |        |            |
| Healthy dietary pattern                        | Esposito 2014 <sup>218</sup>      | 18                     | High v low    | Higher adherence v lower adherence  | 446'213 / 21'566                   | 0.79 (0.74 to 0.85) | 0.000   | 54.1%          | 0.0106         | 0.62 to 0.99     | 0.87            | 8      | Moderate   |
| Unhealthy dietary pattern                      | Alhazmi 2014 <sup>219</sup>       | 10                     | High v low    | Higher adherence v. lower adherence | 291'406 / 19'149                   | 1.44 (1.33 to 1.56) | 0.000   | 3.0%           | 0.0006         | 1.29 to 1.61     | 0.26            | 9      | Moderate   |
| Healthy eating index (HEI)                     | Schwingshackl 2017 <sup>220</sup> | 3                      | High v low    | Higher adherence v lower adherence  | 262'184 / NA                       | 0.86 (0.79 to 0.93) | 0.000   | 76.7%          | 0.0037         | 0.32 to 2.17     | 0.89            | 9      | Low        |
| Alternative healthy eating index (AHEI)        | Schwingshackl 2017 <sup>220</sup> | 9                      | High v low    | Higher adherence v lower adherence  | 564'048 / NA                       | 0.79 (0.73 to 0.85) | 0.000   | 78.3%          | 0.0095         | 0.62 to 1.01     | 0.52            | 9      | Moderate   |
| Dietary Approach to Stop Hypertension (DASH)   | Schwingshackl 2017 <sup>220</sup> | 7                      | High v low    | Higher adherence v lower adherence  | 258'893 / NA                       | 0.80 (0.73 to 0.88) | 0.000   | 67.4%          | 0.0072         | 0.63 to 1.03     | 0.66            | 9      | Low        |
| Mediterranean Diet                             | Koloverou 2014 <sup>221</sup>     | 9                      | High v low    | Higher adherence v lower adherence  | 135'168 / 19'609                   | 0.85 (0.76 to 0.95) | 0.004   | 59.0%          | 0.0131         | 0.63 to 1.15     | 0.66            | 9      | Low        |
| Vegetarian diet                                | Lee & Park 2017 <sup>222</sup>    | 2                      | High v low    | Vegetarian v Omnivores              | 49'788 / NA                        | 0.67 (0.54 to 0.84) | 0.000   | 58.3%          | 0.0158         | NE (< 3 studies) | NA              | 7      | Low        |
| Low carbohydrate diet                          | Namazi 2017 <sup>223</sup>        | 4                      | High v low    | Higher adherence v lower adherence  | 130'515 / 8081                     | 1.17 (0.90 to 1.51) | 0.25    | 81.5%          | 0.0478         | 0.39 to 3.51     | 0.82            | 8      | Very low   |
| Breakfast skipping                             | Bi 2015 <sup>224</sup>            | 4                      | High v low    | Everyday v Never                    | 81'666 / 4197                      | 1.21 (1.12 to 1.31) | 0.000   | 0.0%           | 0.0000         | 1.02 to 1.44     | 0.10            | 8      | Low        |
| Glycemic Index                                 | Bhupathiraju 2014 <sup>225</sup>  | 13                     | High v low    | NA                                  | NA / 35'715                        | 1.13 (1.03 to 1.24) | 0.01    | 77.8%          | 0.0204         | 0.81 to 1.58     | 0.17            | 8      | Low        |
| Glycemic Load                                  | Bhupathiraju 2014 <sup>225</sup>  | 17                     | High vs low   | NA                                  | NA / 46'115                        | 1.11 (1.05 to 1.17) | 0.000   | 36.0%          | 0.0040         | 0.96 to 1.29     | 0.15            | 8      | Moderate   |
| Dietary acid load*                             | Jayedi 2018                       | 6                      | Dose-response | Per 5 units/d                       | 319'542 / 17'983                   | 1.04 (1.02 to 1.07) | NA      | 79.2%          | NA             | NA               | NA              | 9      | Moderate   |

SHR = Summary hazard ratio, NA = not available

Supplemental Table 3 continued...

| Exposure                     | Reference                         | No. of primary studies | Comparison        | Range / Amount    | No. of participants / No. of cases | SHR (95%-CI)        | p-value | I <sup>2</sup> | T <sup>2</sup> | 95%-PI           | Egger's p-value | AMSTAR | NutriGrade |
|------------------------------|-----------------------------------|------------------------|-------------------|-------------------|------------------------------------|---------------------|---------|----------------|----------------|------------------|-----------------|--------|------------|
| <b>Food groups and foods</b> |                                   |                        |                   |                   |                                    |                     |         |                |                |                  |                 |        |            |
| Total dairy                  | Schwingshackl 2017 <sup>226</sup> | 21                     | Dose-response     | per 200 g/d       | 566'872 / 44'474                   | 0.96 (0.94 to 0.99) | 0.002   | 74.5%          | 0.0013         | 0.89 to 1.04     | 0.02            | 9      | Moderate   |
| Low-fat dairy products       | Gijsbers 2016 <sup>227</sup>      | 13                     | Dose-response     | per 200 g/d       | 405'667 / 27'597                   | 0.96 (0.92 to 1.00) | 0.07    | 66.0%          | 0.0032         | 0.84 to 1.10     | 0.11            | 8      | Low        |
| High-fat dairy products      | Gijsbers 2016 <sup>227</sup>      | 13                     | Dose-response     | per 200 g/d       | 327'895 / 24'034                   | 0.98 (0.93 to 1.04) | 0.55    | 53.3%          | 0.0038         | 0.85 to 1.14     | 0.93            | 8      | Low        |
| Milk                         | Gijsbers 2016 <sup>227</sup>      | 10                     | Dose-response     | per 200 g/d       | 140'787 / 16722                    | 0.99 (0.94 to 1.03) | 0.53    | 49.0%          | 0.0021         | 0.87 to 1-11     | 0.02            | 8      | Low        |
| Low-fat milk                 | Gijsbers 2016 <sup>227</sup>      | 7                      | Dose-response     | per 200 g/d       | 267'607 / 20'098                   | 1.01 (0.98 to 1.05) | 0.51    | 73.4%          | 0.0013         | 0.91 to 1.13     | 0.05            | 7      | Low        |
| High-fat milk                | Gijsbers 2016 <sup>227</sup>      | 9                      | Dose-response     | per 200 g/d       | 336'080 / 21'995                   | 0.99 (0.88 to 1.11) | 0.82    | 84.9%          | 0.0210         | 0.68 to 1.43     | 0.80            | 8      | Low        |
| Yogurt                       | Gijsbers 2016 <sup>227</sup>      | 11                     | Dose-response     | per 50 g/d        | 438'140 / 36'125                   | 0.94 (0.91 to 0.98) | 0.001   | 76.1%          | 0.0022         | 0.83 to 1.05     | 0.18            | 8      | Moderate   |
| Cheese                       | Gijsbers 2016 <sup>227</sup>      | 12                     | Dose-response     | per 10 g/d        | 369'697 / 32'936                   | 1.00 (0.99 to 1.02) | 0.68    | 60.5%          | 0.0004         | 0.96 to 1.05     | 0.72            | 8      | Low        |
| Cottage cheese               | Aune 2013 <sup>228</sup>          | 2                      | High v low Intake | ≥2 s/wk v <1 s/mo | 78'437 / 2846                      | 0.91 (0.79 to 1.04) | 0.18    | 0.0%           | 0.0000         | NE (< 3 studies) | NA              | 6      | Very low   |
| Fermented dairy products     | Gao 2013 <sup>229</sup>           | 3                      | High v low intake | 260 g v 13 g      | 33'893 / 11'181                    | 0.94 (0.75 to 1.17) | 0.60    | 43.4%          | 0.0172         | 0.10 to 8.47     | 0.69            | 8      | Low        |
| Cream                        | Gijsbers 2016 <sup>227</sup>      | 5                      | Dose-response     | per 5 g/d         | 258'571 / 19'619                   | 0.99 (0.97 to 1.01) | 0.26    | 28.3%          | 0.0001         | 0.94 to 1.04     | 0.33            | 7      | Low        |
| Ice cream                    | Gijsbers 2016 <sup>227</sup>      | 5                      | Dose-response     | per 10 g/d        | 258'571 / 19'619                   | 0.93 (0.89 to 0.97) | 0.002   | 85.8%          | 0.0022         | 0.79 to 1.10     | 0.85            | 7      | Low        |
| Sherbet                      | Gijsbers 2016 <sup>227</sup>      | 4                      | Dose-response     | per 10 g/d        | 231'641 / 16'759                   | 1.00 (0.97 to 1.03) | 0.91    | 44.3%          | 0.0003         | 0.90 to 1.10     | 0.84            | 7      | Low        |
| Chocolate*                   | Yuan 2017 <sup>230</sup>          | 5                      | Dose-response     | Per 2 s/week      | 132'845 / 13'271                   | 0.75 (0.63 to 0.89) | -       | NA             | NA             | NA               | -               | 8      | Moderate   |
| Eggs                         | Schwingshackl 2017 <sup>226</sup> | 13                     | Dose-response     | per 50 g/d        | 315'358 / 17'629                   | 1.08 (0.95 to 1.22) | 0.27    | 77.3%          | 0.0350         | 0.70 to 1.66     | 0.42            | 9      | Low        |
| Total meat                   | Feskens 2013 <sup>231</sup>       | 8                      | Dose-response     | per 100 g/d       | 457'324 / 7'999                    | 1.12 (1.01 to 1.24) | 0.03    | 73.5%          | 0.0136         | 0.85 to 1.47     | 0.76            | 3      | Moderate   |
| Red meat                     | Schwingshackl 2017 <sup>226</sup> | 14                     | Dose-response     | per 100 g/d       | 550'342 / 43'781                   | 1.17 (1.08 to 1.26) | 0.000   | 82.8%          | 0.0142         | 0.89 to 1.54     | 0.83            | 9      | High       |
| Processed meat               | Schwingshackl 2017 <sup>226</sup> | 14                     | Dose-response     | per 50 g/d        | 550'342 / 43'781                   | 1.37 (1.22 to 1.54) | 0.000   | 88.0%          | 0.0360         | 0.89 to 2.12     | 0.12            | 9      | High       |
| Hamburger*                   | Aune 2009 <sup>232</sup>          | 3                      | Dose-response     | per 1 s/wk        | 171'059 / 3'620                    | 1.09 (1.02 to 1.16) | NA      | 55.6%          | NA             | NA               | -               | 5      | Low        |
| Bacon*                       | Micha 2010 <sup>233</sup>         | 5                      | Dose-response     | per 2 slices/d    | 311'222 / 8'048                    | 2.07 (1.40 to 3.05) | NA      | NA             | NA             | NA               | -               | 9      | High       |

\*summary hazard ratio extracted from published meta-analysis, no re-analysis possible, SHR = Summary hazard ratio, NA = not available

**Supplemental Table 3 continued...**

| Exposure                     | Reference                          | No. of primary studies | Comparison        | Range / Amount  | No. of participants / No. of cases | SHR (95%-CI)        | p-value | I <sup>2</sup> | τ <sup>2</sup> | 95%-PI        | Egger's p-value | AMSTAR | NutriGrade |
|------------------------------|------------------------------------|------------------------|-------------------|-----------------|------------------------------------|---------------------|---------|----------------|----------------|---------------|-----------------|--------|------------|
| Hot Dogs*                    | Micha 2010 <sup>233</sup>          | 4                      | Dose-response     | per 1 piece/d   | 240'613 / 6'079                    | 1.92 (1.33 to 2.78) | NA      | NA             | NA             | NA            | -               | 9      | Moderate   |
| Poultry                      | Feskens 2013 <sup>231</sup>        | 10                     | Dose-response     | per 100 g/d     | 45'567 / 2'283                     | 1.05 (0.91 to 1.22) | 0.46    | 0.0%           | 0.0000         | 0.42 to 2.66  | 0.38            | 2      | Low        |
| Processed red meat           | Pan 2011 <sup>234</sup>            | 8                      | Dose-response     | per 50 g/d      | 371'492 / 26'256                   | 1.44 (1.18 to 1.76) | 0.000   | 94.8%          | 0.0745         | 0.71 to 2.94  | 0.51            | 6      | Moderate   |
| Unprocessed red meat         | Feskens 2013 <sup>231</sup>        | 10                     | Dose-response     | per 100 g/d     | 486'142 / 28'991                   | 1.11 (0.97 to 1.28) | 0.14    | 93.6%          | 0.0432         | 0.67 to 1.85  | 0.33            | 2      | Low        |
| Total fish/seafood           | Schwingshackl 2017 <sup>226</sup>  | 14                     | Dose-response     | per 100 g/d     | 582'656 / 37'645                   | 1.11 (0.94 to 1.31) | 0.22    | 84.9%          | 0.0664         | 0.62 to 2.01  | 0.49            | 9      | Low        |
| Lean fish                    | Zhang 2013 <sup>235</sup>          | 4                      | High v low intake | 166 v 0 g/d     | 103'949 / 12'899                   | 1.03 (0.89 to 1.20) | 0.65    | 55.7%          | 0.0124         | 0.58 to 1.84  | 0.25            | 8      | Low        |
| Oily fish                    | Zhang 2013 <sup>235</sup>          | 4                      | High v low intake | 166 v 0 g/d     | 103'949 / 12'899                   | 0.89 (0.82 to 0.96) | 0.004   | 0.0%           | 0.0000         | 0.74 to 1.06  | 0.27            | 9      | Low        |
| Shellfish                    | Zhang 2013 <sup>235</sup>          | 3                      | High v low intake | 79.6 v <2.9 g/d | 162'953 / 15'399                   | 1.03 (0.83 to 1.28) | 0.78    | 83.3%          | 0.0309         | 0.07 to 14.78 | 0.35            | 9      | Low        |
| Fish                         | Zhang 2013 <sup>235</sup>          | 7                      | High v low intake | 166 v 0 g/d     | 419'613 / 26'596                   | 1.01 (0.92 to 1.22) | 0.89    | 67.2%          | 0.0134         | 0.72 to 1.40  | 0.98            | 9      | Low        |
| Butter                       | Pimpin 2016 <sup>236</sup>         | 4                      | Dose-response     | per 14 g/d      | 201'628 / 23'954                   | 0.96 (0.93 to 1.00) | 0.03    | 49.6%          | 0.0007         | 0.84 to 1.10  | 0.46            | 11     | Low        |
| Olive oil                    | Schwingshackl 2017b <sup>237</sup> | 4                      | Dose-response     | per 10 g/d      | 183'370 / 21'688                   | 0.91 (0.87 to 0.96) | 0.000   | 0.0%           | 0.0000         | 0.82 to 1.01  | 0.10            | 8      | Low        |
| Potatoes                     | Schwingshackl 2018 <sup>238</sup>  | 7                      | Dose-response     | per 150 g/d     | 360'914 / 18'334                   | 1.18 (1.10 to 1.27) | 0.000   | 30.8%          | 0.0028         | 1.00 to 1.39  | 0.11            | 7      | Low        |
| French fries                 | Schwingshackl 2018 <sup>238</sup>  | 4                      | Dose-response     | per 150 g/d     | 222'712 / 16'199                   | 1.66 (1.43 to 1.93) | 0.000   | 0.0%           | 0.0000         | NA            | NA              | 7      | Moderate   |
| Boiled/baked/mashed potatoes | Schwingshackl 2018 <sup>238</sup>  | 4                      | Dose-response     | per 150 g/d     | 222'712 / 16'199                   | 1.09 (1.01 to 1.18) | 0.03    | 0.0%           | 0.0000         | NA            | NA              | 7      | Low        |
| Whole grain                  | Schwingshackl 2017 <sup>226</sup>  | 12                     | Dose-response     | per 30 g/d      | 459'603 / 22'267                   | 0.87 (0.82 to 0.93) | 0.000   | 91.0%          | 0.0105         | 0.68 to 1.11  | 0.79            | 9      | High       |
| Refined grain                | Schwingshackl 2017 <sup>226</sup>  | 14                     | Dose-response     | per 30 g/d      | 620'319 / 24'463                   | 1.01 (1.00 to 1.03) | 0.34    | 59.4%          | 0.0004         | 0.96 to 1.06  | 0.65            | 9      | Moderate   |
| Total grains                 | Aune 2013 <sup>239</sup>           | 4                      | Dose-response     | per 3 s/d       | 147'466 / 3'541                    | 0.83 (0.75 to 0.92) | 0.000   | 36.1%          | 0.0035         | 0.70 to 1.16  | 0.50            | 6      | Low        |
| Whole grain bread*           | Aune 2013 <sup>239</sup>           | 3                      | Dose-response     | per 3 s/d       | 168'217 / 4'229                    | 0.74 (0.56 to 0.98) | NA      | 44.1%          | NA             | NA            | -               | 6      | Low        |
| Whole grain cereals*         | Aune 2013 <sup>239</sup>           | 3                      | Dose-response     | per 1 s/d       | 132'661 / 4'978                    | 0.73 (0.59 to 0.91) | NA      | 80.3%          | NA             | NA            | -               | 6      | Low        |

\*summary hazard ratio extracted from published meta-analysis, no re-analysis possible, SHR = Summary hazard ratio, NA = not available

Supplemental Table 3 continued...

| Exposure               | Reference                         | No. of primary studies | Comparison        | Range / Amount     | No. of participants / No. of cases | SHR (95%-CI)        | p-value | I <sup>2</sup> | T <sup>2</sup> | 95%-PI       | Egger's p-value | AMSTAR | NutriGrade |
|------------------------|-----------------------------------|------------------------|-------------------|--------------------|------------------------------------|---------------------|---------|----------------|----------------|--------------|-----------------|--------|------------|
| Wheat bran*            | Aune 2013 <sup>239</sup>          | 3                      | Dose-response     | per 10 g/d         | 197'228 / 10'507                   | 0.79 (0.72 to 0.87) | NA      | 49.1%          | NA             | NA           | -               | 6      | Moderate   |
| Wheat germ*            | Aune 2013 <sup>239</sup>          | 3                      | Dose-response     | per 2 g/d          | 197'228 / 10'507                   | 0.98 (0.87 to 1.11) | NA      | 50.1%          | NA             | NA           | -               | 6      | Low        |
| Total rice             | Saneei 2017 <sup>240</sup>        | 7                      | High v low intake | 700 g/d v <1/mo    | 352'953 / 13'637                   | 1.18 (0.94 to 1.48) | 0.15    | 77.7%          | 0.0669         | 0.57 to 2.44 | 0.02            | 7      | Low        |
| White rice*            | Aune 2013 <sup>239</sup>          | 7                      | Dose-response     | per 1 s/d          | 352'879 / 13'637                   | 1.23 (1.15 to 1.31) | NA      | 21.4%          | NA             | NA           | -               | 6      | Moderate   |
| Brown rice*            | Aune 2013 <sup>239</sup>          | 3                      | Dose-response     | Per 0.5 s/d        | 197'228 / 10'507                   | 0.87 (0.78 to 0.97) | NA      | 26.1%          | NA             | NA           | -               | 6      | Low        |
| Soy products           | Tian 2017 <sup>241</sup>          | 8                      | High v low intake | NA                 | 457'927 / 78'381                   | 0.83 (0.68 to 1.01) | 0.05    | 89.4%          | 0.0607         | 0.43 to 1.58 | 0.005           | 6      | Very low   |
| Legumes                | Schwingshackl 2017 <sup>226</sup> | 12                     | Dose-response     | per 50 g/d         | 595'641 / 31'297                   | 1.00 (0.92 to 1.09) | 0.99    | 86.9%          | 0.0141         | 0.75 to 1.33 | 0.89            | 9      | Low        |
| Nuts                   | Schwingshackl 2017 <sup>226</sup> | 7                      | Dose-response     | per 28 g/d         | 297'012 / 15'470                   | 0.89 (0.71 to 1.12) | 0.31    | 77.2%          | 0.0592         | 0.44 to 1.78 | 0.14            | 8      | Low        |
| Fruits and vegetables  | Li 2014 <sup>242</sup>            | 5                      | Dose-response     | per 1 s/d          | 160'833 / 19'123                   | 0.96 (0.88 to 1.05) | 0.41    | 32.1%          | 0.0032         | 0.77 to 1.21 | 0.72            | 8      | Low        |
| Fruit total            | Schwingshackl 2017 <sup>226</sup> | 13                     | Dose-response     | per 100 g/d        | 850'985 / 53'317                   | 0.98 (0.97 to 1.00) | 0.009   | 24.8%          | 0.0001         | 0.95 to 1.01 | 0.33            | 9      | Moderate   |
| Berry fruits*          | Guo 2016 <sup>243</sup>           | 4                      | Dose-response     | per 17 g/d         | 189'715 / 12'630                   | 0.95 (0.91 to 0.99) | NA      | 0.0%           | NA             | NA           | -               | 8      | Low        |
| Citrus fruits          | Jia 2016 <sup>244</sup>           | 6                      | High v low intake | 1.57 s/d v <1 s/mo | 304'391 / 1'614                    | 1.02 (0.96 to 1.08) | 0.58    | 0.0%           | 0.0000         | 0.93 to 1.11 | 0.65            | 9      | Very low   |
| Apples and pears       | Guo 2017 <sup>245</sup>           | 5                      | Dose-response     | per 1 s/wk         | 228'315 / 14'120                   | 0.97 (0.96 to 0.98) | 0.000   | 0.0%           | 0.0000         | 0.96 to 0.99 | 0.92            | 8      | Low        |
| Vegetables total       | Schwingshackl 2017 <sup>226</sup> | 11                     | Dose-response     | per 100 g/d        | 734'949 / 45'648                   | 0.98 (0.96 to 1.00) | 0.13    | 64.3%          | 0.0006         | 0.93 to 1.04 | 0.91            | 9      | Moderate   |
| Cruciferous vegetables | Chen 2018 <sup>246</sup>          | 4                      | Dose-response     | Per 40 g/d         | 196'057 / 9325                     | 0.93 (0.84 to 1.02) | 0.16    | 81.2%          | 0.0076         | 0.61 to 1.44 | 0.20            | 8      | Low        |
| Green leafy vegetables | Chen 2018 <sup>246</sup>          | 9                      | Dose-response     | Per 40 g/d         | 697'337 / 50'499                   | 0.97 (0.94 to 1.00) | 0.04    | 74.1%          | 0.0010         | 0.89 to 1.05 | 0.35            | 8      | Low        |
| Yellow vegetables      | Wang 2016 <sup>247</sup>          | 3                      | High v low intake | NA                 | 106'513 / 3'605                    | 0.62 (0.52 to 0.73) | 0.000   | 52.0%          | 0.0114         | 0.11 to 3.53 | 0.12            | 6      | Low        |
| <b>Beverages</b>       |                                   |                        |                   |                    |                                    |                     |         |                |                |              |                 |        |            |
| Tea*                   | Yang WS 2014 <sup>248</sup>       | 13                     | Dose-response     | per 2 cups/d       | 503'165 / 35'574                   | 0.95 (0.92 to 0.99) | NA      | 60.3%          | NA             | NA           | -               | 9      | Moderate   |

\*summary hazard ratio extracted from published meta-analysis, no re-analysis possible, SHR = Summary hazard ratio, NA = not available

Supplemental Table 3 continued...

| Exposure                         | Reference                         | No. of primary studies | Comparison               | Range / Amount             | No. of participants / No. of cases | SHR (95%-CI)        | p-value | I <sup>2</sup> | τ <sup>2</sup> | 95%-PI           | Egger's p-value | AMSTAR | NutriGrade |
|----------------------------------|-----------------------------------|------------------------|--------------------------|----------------------------|------------------------------------|---------------------|---------|----------------|----------------|------------------|-----------------|--------|------------|
| Total coffee                     | Carlström 2018 <sup>249</sup>     | 30                     | Dose-response            | per 1 cup/d                | 1'180'634 / 53'018                 | 0.94 (0.93 to 0.95) | 0.000   | 62.5%          | 0.0004         | 0.90 to 0.98     | 0.02            | 8      | Moderate   |
| Caffeinated coffee*              | Ding 2014 <sup>250</sup>          | 11                     | Dose-response            | per 1 cup/d                | 492'203 / 29'073                   | 0.91 (0.89 to 0.94) | NA      | NA             | NA             | NA               | -               | 8      | Moderate   |
| Decaffeinated coffee*            | Ding 2014 <sup>250</sup>          | 11                     | Dose-response            | per 1 cup/d                | 492'203 / 29'385                   | 0.94 (0.91 to 0.98) | NA      | NA             | NA             | NA               | -               | 8      | Moderate   |
| Sugar sweetened beverages        | Imamura 2015 <sup>251</sup>       | 14                     | Dose-response            | per 1 s/d                  | 384'063 / 36'348                   | 1.26 (1.11 to 1.43) | 0.000   | 73.8%          | 0.0339         | 0.83 to 1.93     | 0.33            | 10     | High       |
| Artificially sweetened beverages | Imamura 2015 <sup>251</sup>       | 8                      | Dose-response            | per 1 s/d                  | 244'228 / 28'394                   | 1.24 (1.10 to 1.39) | 0.000   | 4.8%           | 0.0014         | 1.05 to 1.47     | 0.29            | 10     | Moderate   |
| Total fruit juice                | Imamura 2015 <sup>251</sup>       | 9                      | Dose-response            | per 1 s/d                  | 361'234 / 32'114                   | 1.10 (1.01 to 1.20) | 0.03    | 41.0%          | 0.0063         | 0.89 to 1.37     | 0.93            | 10     | Low        |
| Sugar-sweetened fruit juice      | Xi 2014 <sup>252</sup>            | 2                      | High v low intake        | >1 s/d v 0                 | 191'686 / 12'375                   | 1.28 (1.04 to 1.58) | 0.02    | 43.3%          | 0.0140         | NE (< 3 studies) | NA              | 7      | Low        |
| 100% fruit juice                 | Xi 2014 <sup>252</sup>            | 3                      | High v low intake        | >2 s/d v 0                 | 137'663 / 4'906                    | 1.04 (0.89 to 1.22) | 0.60    | 33.4%          | 0.0066         | 0.24 to 4.48     | 0.47            | 7      | Very low   |
| Fruit juice. not specified       | Xi 2014 <sup>252</sup>            | 2                      | High v low intake        | Q4 or ≥3 s/d v Q1 or 2 s/d | 45'912 / 2'705                     | 1.13 (0.91 to 1.41) | 0.26    | 36.0%          | 0.0091         | NE (< 3 studies) | NA              | 7      | Very low   |
| <b>Alcoholic beverages</b>       |                                   |                        |                          |                            |                                    |                     |         |                |                |                  |                 |        |            |
| Total alcohol                    | Li et al (2016) <sup>33</sup>     | 16                     | Non-linear dose-response | 0-12 g/d                   | 421'698 / 10'622                   | 0.82 (0.71 to 0.94) | 0.004   | 85.2%          | 0.0512         | 0.49 to 1.36     | 0.45            | 8      | Moderate   |
|                                  |                                   | 23                     |                          | 12-24 g/d                  | 664'873 / 30'122                   | 0.75 (0.67 to 0.83) | 0.000   | 75.7%          | 0.0356         | 0.50 to 1.12     | 0.64            | 8      | High       |
|                                  |                                   | 16                     |                          | ≥24 g/d                    | 306'745 / 8419                     | 0.95 (0.83 to 1.09) | 0.476   | 66.2%          | 0.0462         | 0.58 to 1.54     | 0.60            | 8      | Moderate   |
| Wine                             | Huang et al (2017) <sup>253</sup> | 9                      | Non-linear dose-response | < 10 g/d                   | 324'362 / 17'854                   | 0.86 (0.81 to 0.91) | 0.000   | 0.0%           | 0.0000         | 0.80 to 0.92     | 0.25            | 9      | Low        |
|                                  |                                   | 7                      |                          | 10-20 g/d                  | 314'496 / 17'408                   | 0.83 (0.76 to 0.91) | 0.000   | 0.0%           | 0.0000         | 0.74 to 0.94     | 0.18            | 9      | Low        |
|                                  |                                   | 7                      |                          | > 20 g/d                   | 209'544 / 16'757                   | 0.83 (0.76 to 0.91) | 0.000   | 0.0%           | 0.0000         | 0.74 to 0.94     | 0.10            | 9      | Low        |
| Beer                             | Huang et al (2017) <sup>253</sup> | 9                      | Non-linear dose-response | < 10 g/d                   | 324'362 / 17'854                   | 0.93 (0.86 to 1.00) | 0.049   | 0.0%           | 0.0000         | 0.85 to 1.02     | 0.09            | 9      | Low        |
|                                  |                                   | 6                      |                          | 10-20 g/d                  | 298'139 / 16'648                   | 0.90 (0.83 to 0.98) | 0.019   | 0.0%           | 0.0000         | 0.80 to 1.02     | 0.44            | 9      | Moderate   |
|                                  |                                   | 6                      |                          | > 20 g/d                   | 251'440 / 15'628                   | 1.01 (0.88 to 1.16) | 0.895   | 0.0%           | 0.0000         | 0.83 to 1.23     | 0.92            | 9      | Low        |

\*summary hazard ratio extracted from published meta-analysis, no re-analysis possible, SHR = Summary hazard ratio, NA = not available



Supplemental Table 3 continued...

| Exposure                           | Reference                         | No. of primary studies | Comparison               | Range / Amount       | No. of participants / No. of cases | SHR (95%-CI)        | p-value | I <sup>2</sup> | τ <sup>2</sup> | 95%-PI       | Egger's p-value | AMSTAR | NutriGrade |
|------------------------------------|-----------------------------------|------------------------|--------------------------|----------------------|------------------------------------|---------------------|---------|----------------|----------------|--------------|-----------------|--------|------------|
| Spirits                            | Huang et al (2017) <sup>253</sup> | 8                      | Non-linear dose-response | < 10 g/d             | 292'940 / 17'492                   | 0.92 (0.85 to 1.00) | 0.04    | 11.9%          | 0.0015         | 0.80 to 1.06 | 0.08            | 9      | Low        |
|                                    |                                   | 6                      |                          | 10-20 g/d            | 283'047 / 17'046                   | 0.94 (0.82 to 1.08) | 0.40    | 22.0%          | 0.0066         | 0.70 to 1.27 | 0.38            | 9      | Low        |
|                                    |                                   | 5                      |                          | > 20 g/d             | 220'018 / 15'266                   | 1.23 (0.82 to 1.86) | 0.31    | 64.1%          | 0.1183         | 0.34 to 4.44 | 0.64            | 9      | Low        |
| <b>Macronutrients</b>              |                                   |                        |                          |                      |                                    |                     |         |                |                |              |                 |        |            |
| Total protein                      | Zhao et al (2018) <sup>254</sup>  | 9                      | Dose-response            | per 5% of energy/d   | 403'109 / 32'663                   | 1.09 (1.04 to 1.13) | 0.000   | 34.7%          | 0.0011         | 0.99 to 1.19 | 0.70            | 10     | Moderate   |
| Animal protein                     | Zhao et al (2018) <sup>254</sup>  | 8                      | Dose-response            | per 5% of energy/d   | 357'893 / 30'591                   | 1.12 (1.08 to 1.17) | 0.000   | 22.4%          | 0.0007         | 1.03 to 1.22 | 0.22            | 10     | Moderate   |
| Animal protein-to-potassium ratio* | Jayedil 2018 <sup>255</sup>       | 3                      | Dose-response            | NA                   | 187'486 / 15'305                   | 1.11 (1.07 to 1.15) | -       | 41.3%          | NA             | NA           | -               | 9      | Moderate   |
| Plant protein                      | Zhao et al (2018) <sup>254</sup>  | 8                      | Dose-response            | per 5% of energy/d   | 357'893 / 30'591                   | 0.87 (0.74 to 1.01) | 0.07    | 41.9%          | 0.0189         | 0.59 to 1.28 | 0.74            | 10     | Low        |
| Total fat                          | Alhazmi 2012 <sup>256</sup>       | 4                      | High v low intake        | Q5 v Q1              | 247'755 / 10'388                   | 0.93 (0.86 to 1.01) | 0.09    | 0.0%           | 0.0000         | 0.79 to 1.11 | 0.89            | 10     | Low        |
| Animal fat                         | Alhazmi 2012 <sup>256</sup>       | 6                      | High v low intake        | Q5 v Q1              | 392'093 / 12'242                   | 1.03 (0.95 to 1.11) | 0.40    | 0.0%           | 0.0000         | 0.92 to 1.16 | 0.59            | 10     | Low        |
| Vegetable fat                      | Alhazmi 2012 <sup>256</sup>       | 6                      | High v low intake        | Q5 v Q1              | 392'093 / 12'242                   | 0.76 (0.68 to 0.85) | 0.000   | 53.1%          | 0.0102         | 0.55 to 1.05 | 0.43            | 10     | Moderate   |
| MUFAs                              | Alhazmi 2012 <sup>256</sup>       | 6                      | High v low intake        | Q5 v Q1/1g/1% energy | 309'758 / 8245                     | 0.99 (0.90 to 1.09) | 0.90    | 0.0%           | 0.0000         | 0.87 to 1.14 | 0.08            | 10     | Low        |
| Total omega-3 fatty acids*         | Zhou 2012 <sup>257</sup>          | 6                      | Dose-response            | per 0.1 g/d          | 31'017 / 15'560                    | 1.03 (1.00 to 1.06) | NA      | 92.1%          | NA             | NA           | -               | 8      | Low        |
| EPA & DHA                          | Wu 2012 <sup>258</sup>            | 15                     | Dose-response            | per 250 mg/d         | 523'938 / 23'739                   | 1.04 (0.97 to 1.11) | 0.24    | 82.2%          | 0.0112         | 0.82 to 1.32 | 0.85            | 8      | Low        |
| EPA*                               | Wu 2012 <sup>258</sup>            | 5                      | Dose-response            | per 125 mg/d         | 47'644 / 4'051                     | 1.07 (0.85 to 1.34) | NA      | 77.4%          | NA             | NA           | -               | 8      | Low        |
| DHA*                               | Wu 2012 <sup>258</sup>            | 5                      | Dose-response            | per 125 mg/d         | 47'644 / 4'051                     | 1.04 (0.90 to 1.21) | NA      | 80.2%          | NA             | NA           | -               | 8      | Low        |
| ALA                                | Alhazmi 2012 <sup>256</sup>       | 6                      | High v low intake        | Q5 v Q1              | 323'024 / 16'200                   | 0.92 (0.78 to 1.08) | 0.31    | 66.2%          | 0.0245         | 0.56 to 1.50 | 0.73            | 10     | Low        |
| Total omega-6 fatty acids          | Alhazmi 2012 <sup>256</sup>       | 3                      | High v low intake        | Q5 v Q1              | 83'209 / 4'483                     | 0.93 (0.84 to 1.03) | 0.18    | 0.0%           | 0.0000         | 0.48 to 1.81 | 0.70            | 10     | Very low   |
| PUFAs                              | Alhazmi 2012 <sup>256</sup>       | 5                      | High v low intake        | Q5 v Q1/1g/1% energy | 272'449 / 6687                     | 0.90 (0.80 to 1.02) | 0.08    | 46.8%          | 0.0089         | 0.62 to 1.28 | 0.17            | 10     | Low        |
| Saturated fatty acids              | De Souza 2015 <sup>259</sup>      | 7                      | High v low intake        | NA                   | 236'306 / 8'900                    | 0.95 (0.88 to 1.03) | 0.21    | 0.0%           | 0.0000         | 0.86 to 1.05 | 0.74            | 8      | Very low   |

\*summary hazard ratio extracted from published meta-analysis, no re-analysis possible, SHR = Summary hazard ratio, NA = not available

Supplemental Table 3 continued...

| Exposure                   | Reference                               | No. of primary studies | Comparison        | Range / Amount   | No. of participants / No. of cases | SHR (95%-CI)        | p-value | I <sup>2</sup> | τ <sup>2</sup> | 95%-PI        | Egger's p-value | AMSTAR | NutriGrade |
|----------------------------|-----------------------------------------|------------------------|-------------------|------------------|------------------------------------|---------------------|---------|----------------|----------------|---------------|-----------------|--------|------------|
| Trans-fatty acids          | De Souza 2015 <sup>259</sup>            | 6                      | High v low intake | NA               | 230'155 / 8'781                    | 1.10 (0.96 to 1.27) | 0.22    | 66.0%          | 0.0206         | 0.70 to 1.71  | 0.81            | 8      | Very low   |
| Ruminant trans-fatty acids | De Souza 2015 <sup>259</sup>            | 3                      | High v low intake | NA               | 8936 / 796                         | 0.54 (0.36 to 0.79) | 0.002   | 30.8%          | 0.0670         | 0.01 to 33.70 | 0.38            | 8      | Low        |
| Cholesterol                | Tajima 2014 <sup>260</sup>              | 4                      | Dose-response     | per 100 mg/d     | 161'399 / 6'268                    | 1.10 (1.03 to 1.17) | 0.005   | 60.4%          | 0.0026         | 0.85 to 1.43  | 0.59            | 7      | Low        |
| Total carbohydrates        | Alhazmi 2012 <sup>256</sup>             | 8                      | High v low intake | Q5 v Q1          | 488'969 / 11'536                   | 1.11 (1.00 to 1.23) | 0.06    | 48.9%          | 0.0105         | 0.83 to 1.47  | 0.07            | 10     | Low        |
| Total sugars               | Tsilas 2017 <sup>261</sup>              | 5                      | Dose-response     | per 100 g/d      | 135'799 / 22'711                   | 0.87 (0.61 to 1.24) | 0.44    | 90.8%          | 0.1253         | 0.25 to 3-08  | 0.74            | 8      | Very low   |
| Fructose                   | Tsilas 2017 <sup>261</sup>              | 4                      | Dose-response     | per 50 g/d       | 69'492 / 2'915                     | 1.09 (0.68 to 1.75) | 0.71    | 81.0%          | 0.1687         | 0.14 to 8.44  | 0.87            | 8      | Very low   |
| Glucose                    | Alhazmi 2012 <sup>256</sup>             | 4                      | High v low intake | Q5 v Q1          | 104'704 / 3'080                    | 1.18 (0.99 to 1.40) | 0.07    | 50.4%          | 0.0157         | 0.61 to 2.28  | 0.59            | 10     | Very low   |
| Lactose                    | Alhazmi 2012 <sup>256</sup>             | 3                      | High v low Intake | Q5 v Q1          | 79'637 / 2'236                     | 0.96 (0.84 to 1.10) | 0.57    | 0.0%           | 0.0000         | 0.39 to 2.35  | 0.83            | 10     | Very low   |
| Maltose                    | Alhazmi 2012 <sup>256</sup>             | 2                      | High v low intake | Q5 v Q1          | 40'292 / 1'318                     | 0.88 (0.64 to 1.21) | 0.43    | 44.6%          | 0.0275         | NA            | NA              | 10     | Very low   |
| Sucrose                    | Tsilas 2017 <sup>261</sup>              | 5                      | Dose-response     | per 50 g/d       | 107'972 / 3'833                    | 0.91 (0.84 to 0.99) | 0.03    | 0.0%           | 0.0000         | 0.79 to 1.04  | 0.25            | 8      | Low        |
| Total fibre                | Interact Consortium 2015 <sup>262</sup> | 15                     | Dose-response     | per 10 g/d       | 414'711 / 26'131                   | 0.91 (0.87 to 0.96) | 0.000   | 31.0%          | 0.0023         | 0.81 to 1.03  | 0.14            | 7      | Moderate   |
| Cereal fibre               | Interact Consortium 2015 <sup>262</sup> | 12                     | Dose-response     | per 10 g/d       | 452'367 / 27'677                   | 0.75 (0.65 to 0.86) | 0.000   | 75.4%          | 0.0402         | 0.47 to 1.20  | 0.07            | 7      | High       |
| Fruit fibre                | Interact Consortium 2015 <sup>262</sup> | 11                     | Dose-response     | per 10 g/d       | 408'416 / 25'715                   | 0.95 (0.87 to 1.03) | 0.21    | 30.4%          | 0.0052         | 0.78 to 1.15  | 0.74            | 7      | Moderate   |
| Vegetable fibre            | Interact Consortium 2015 <sup>262</sup> | 10                     | Dose-response     | per 10 g/d       | 396'165 / 24'266                   | 0.93 (0.82 to 1.06) | 0.27    | 44.6%          | 0.0160         | 0.67 to 1.29  | 0.80            | 7      | Moderate   |
| Soluble fibre              | Interact Consortium 2015 <sup>262</sup> | 3                      | Dose-response     | per 10 g/d       | 65'373 / 2'141                     | 0.70 (0.47 to 1.04) | 0.08    | 0.0%           | 0.0000         | 0.05 to 9.02  | 0.35            | 5      | Low        |
| Insoluble fibre            | Interact Consortium 2015 <sup>262</sup> | 3                      | Dose-response     | per 10 g/d       | 65'373 / 2'141                     | 0.73 (0.62 to 0.86) | 0.000   | 0.0%           | 0.0000         | 0.25 to 2.11  | 0.90            | 5      | Low        |
| <b>Micronutrients</b>      |                                         |                        |                   |                  |                                    |                     |         |                |                |               |                 |        |            |
| Vitamin D                  | Zhao 2013 <sup>263</sup>                | 4                      | High v low intake | >800 v <100 IU/d | 187'552 / 9'456                    | 0.92 (0.85 to 1.00) | 0.06    | 0.0%           | 0.0000         | 0.77 to 1.11  | 0.03            | 7      | Very low   |

\*summary hazard ratio extracted from published meta-analysis, no re-analysis possible, SHR = Summary hazard ratio, NA = not available

Supplemental Table 3 continued...

| Exposure          | Reference                          | No. of primary studies | Comparison        | Range / Amount  | No. of participants / No. of cases | SHR (95%-CI)        | p-value | I <sup>2</sup> | T <sup>2</sup> | 95%-PI           | Egger's p-value  | AMSTAR | NutriGrade |
|-------------------|------------------------------------|------------------------|-------------------|-----------------|------------------------------------|---------------------|---------|----------------|----------------|------------------|------------------|--------|------------|
| Total iron        | Bao 2012 <sup>264</sup>            | 3                      | Dose-response     | per 5 mg/d      | 158'038 / 8'078                    | 1.01 (0.99 to 1.03) | 0.18    | 0.0%           | 0.0000         | 0.90 to 1.14     | 0.68             | 6      | Low        |
| Haem iron         | Bao 2012 <sup>264</sup>            | 3                      | Dose-response     | per 1 mg/d      | 158'038 / 8'078                    | 1.16 (1.09 to 1.24) | 0.000   | 38.7%          | 0.0012         | 0.64 to 2.10     | 0.66             | 6      | Low        |
| Magnesium         | Fang Xuexian 2016 <sup>265</sup>   | 17                     | Dose-response     | per 100 mg/d    | 518'339 / 25'557                   | 0.81 (0.77 to 0.86) | 0.000   | 60.6%          | 0.0058         | 0.68 to 0.96     | 0.11             | 9      | Moderate   |
| Calcium           | Dong & Qin 2012 <sup>266</sup>     | 6                      | High v low Intake | 2596 v 500 mg/d | 264'218 / 11'225                   | 0.85 (0.74 to 0.98) | 0.02    | 57.3%          | 0.0161         | 0.57 to 1.28     | 0.82             | 6      | Low        |
| Total polyphenols | Rienks et al (2018) <sup>267</sup> | 2                      | High v low intake | NA              | 9236 / 770                         | 0.56 (0.34 to 0.93) | 0.02    | 77.5%          | 0.1030         | NE (< 3 studies) | NE (< 3 studies) | 8      | Low        |
| Flavonoids*       | Rienks et al (2018) <sup>267</sup> | 7                      | Dose-response     | per 372 mg/d    | 309'780 / 28'976                   | 0.96 (0.92 to 1.00) | NA      | 33.2%          | NA             | NA               | NA               | 8      | Low        |
| Anthocyanins*     | Guo 2016 <sup>243</sup>            | 3                      | Dose-response     | per 7.5 mg/d    | 200'894 / 12'611                   | 0.95 (0.93 to 0.98) | NA      | 0.0%           | NA             | NA               | -                | 8      | Low        |
| Flavanols         | Rienks et al (2018) <sup>267</sup> | 2                      | High v low intake | NA              | 31'894 / 11'286                    | 0.68 (0.45 to 1.02) | 0.06    | 78.8%          | 0.0687         | NE (< 3 studies) | NE (< 3 studies) | 8      | Low        |
| Flavan-3-ols*     | Rienks et al (2018) <sup>267</sup> | 4                      | Dose-response     | per 79 mg/d     | 226'068 / 23'441                   | 0.97 (0.93 to 1.00) | NA      | 61.4%          | NA             | NA               | NA               | 8      | Low        |
| Catechin          | Rienks et al (2018) <sup>267</sup> | 2                      | High v low intake | NA              | 29'518 / 11'144                    | 0.86 (0.75 to 0.97) | 0.02    | 0.0%           | 0.0000         | NE (< 3 studies) | NE (< 3 studies) | 8      | Low        |
| Proanthocyanid s  | Rienks et al (2018) <sup>267</sup> | 2                      | High v low intake | NA              | 29'518 / 11'144                    | 0.88 (0.75 to 1.02) | 0.09    | 11.1%          | 0.0021         | NE (< 3 studies) | NE (< 3 studies) | 8      | Low        |
| Flavanones        | Rienks et al (2018) <sup>267</sup> | 7                      | High v low intake | NA              | 245'182 / 24'737                   | 1.01 (0.93 to 1.10) | 0.81    | 45.5%          | 0.0049         | 0.82 to 1.24     | 0.04             | 8      | Low        |
| Flavones*         | Rienks et al (2018) <sup>267</sup> | 5                      | Dose-response     | per 4.6 mg/d    | 264'086 / 25'055                   | 1.05 (0.95 to 1.16) | NA      | 48.3%          | NA             | NA               | NA               | 8      | Low        |
| Luteolin*         | Rienks et al (2018) <sup>267</sup> | 2                      | Dose-response     | per 0.1 mg/d    | 63'523 / 2274                      | 1.02 (0.94 to 1.10) | NA      | 0.0%           | NA             | NA               | NA               | 8      | Very low   |
| Flavonoles*       | Rienks et al (2018) <sup>267</sup> | 7                      | Dose-response     | per 28 mg/d     | 299'469 / 26'241                   | 0.91 (0.83 to 1.00) | NA      | 80.4%          | NA             | NA               | NA               | 8      | Low        |
| Quercetin*        | Rienks et al (2018) <sup>267</sup> | 4                      | Dose-response     | per 10 mg/d     | 99'486 / 13'630                    | 1.00 (0.94 to 1.05) | NA      | 43.7%          | NA             | NA               | NA               | 8      | Low        |
| Kaempferol*       | Rienks et al (2018) <sup>267</sup> | 4                      | Dose-response     | per 4 mg/d      | 99'486 / 13'630                    | 0.98 (0.94 to 1.01) | NA      | 0.0%           | NA             | NA               | NA               | 8      | Low        |
| Myricetin         | Rienks et al (2018) <sup>267</sup> | 4                      | High v low intake | NA              | 99'486 / 13'630                    | 0.90 (0.76 to 1.05) | 0.18    | 58.6%          | 0.0154         | 0.47 to 1.70     | 0.99             | 8      | Low        |
| Isoflavones*      | Rienks et al (2018) <sup>267</sup> | 7                      | Dose-response     | per 0.63 mg/d   | 293'861 / 24'013                   | 1.00 (1.00 to 1.00) | NA      | 21.0%          | NA             | NA               | NA               | 8      | Low        |
| Daidzein*         | Rienks et al (2018) <sup>267</sup> | 4                      | Dose-response     | per 0.2 mg/d    | 223'248 / 10'295                   | 1.00 (1.00 to 1.00) | NA      | 66.1%          | NA             | NA               | NA               | 8      | Low        |

\*summary hazard ratio extracted from published meta-analysis, no re-analysis possible, SHR = Summary hazard ratio, NA = not available

**Supplemental Table 3 continued...**

| Exposure           | Reference                          | No. of primary studies | Comparison        | Range / Amount     | No. of participants / No. of cases | SHR (95%-CI)        | p-value | I <sup>2</sup> | τ <sup>2</sup> | 95%-PI           | Egger's p-value | AMSTAR | NutriGrade |
|--------------------|------------------------------------|------------------------|-------------------|--------------------|------------------------------------|---------------------|---------|----------------|----------------|------------------|-----------------|--------|------------|
| Genistein*         | Rienks et al (2018) <sup>267</sup> | 4                      | Dose-response     | per 0.25 mg/d      | 223'248 / 10'295                   | 1.00 (1.00 to 1.00) | NA      | 18.5%          | NA             | NA               | NA              | 8      | Low        |
| Dihydrochalcones*  | Rienks et al (2018) <sup>267</sup> | 2                      | Dose-response     | per 2 mg/d         | 9236 / 770                         | 1.01 (0.98 to 1.04) | NA      | 0.0%           | NA             | NA               | NA              | 8      | Very low   |
| Phenolic acids*    | Rienks et al (2018) <sup>267</sup> | 2                      | Dose-response     | per 600 mg/d       | 9236 / 770                         | 0.76 (0.64 to 0.89) | NA      | 0.0%           | NA             | NA               | NA              | 8      | Low        |
| Stilbenes*         | Rienks et al (2018) <sup>267</sup> | 2                      | Dose-response     | per 2.7 mg/d       | 9236 / 770                         | 0.14 (0.01 to 1.51) | NA      | 94.9%          | NA             | NA               | NA              | 8      | Low        |
| Lignans*           | Rienks et al (2018) <sup>267</sup> | 2                      | Dose-response     | per 3 mg/d         | 9236 / 770                         | 1.27 (0.68 to 2.42) | NA      | 52.5%          | NA             | NA               | NA              | 8      | Low        |
| Other polyphenols* | Rienks et al (2018) <sup>267</sup> | 2                      | Dose-response     | per 50 mg/d        | 9236 / 770                         | 1.05 (0.89 to 1.25) | NA      | 0.0%           | NA             | NA               | NA              | 8      | Very low   |
| Vitamin E          | Hamer & Chida 2007 <sup>268</sup>  | 3                      | High v low intake | 10 v <0.5 mg/d     | 14'772 / 1'541                     | 0.77 (0.63 to 0.95) | 0.02    | 0.0%           | 0.0000         | 0.20 to 2.97     | 0.75            | 8      | Very low   |
| Vitamin C          | Hamer & Chida 2007 <sup>268</sup>  | 2                      | High v low intake | 87.9 v <49.7 mg/d  | 13'877 / 1'393                     | 0.66 (0.51 to 0.85) | 0.002   | 0.0%           | 0.0000         | NE (< 3 studies) | NA              | 8      | Very low   |
| Lycopene           | Hamer & Chida 2007 <sup>268</sup>  | 2                      | High v low intake | >7079 v <2307 µg/d | 40'087 / 1'927                     | 0.96 (0.74 to 1.25) | 0.76    | 60.3%          | 0.0233         | NE (< 3 studies) | NA              | 8      | Very low   |
| Caffeine*          | Ding 2014 <sup>250</sup>           | 7                      | Dose-response     | Per 140 mg/d       | 260'090 / 11'842                   | 0.92 (0.90 to 0.94) | NA      | NA             | NA             | NA               | -               | 6      | Low        |

\*summary hazard ratio extracted from published meta-analysis, no re-analysis possible, SHR = Summary hazard ratio, NA = not available

**Supplementary Table 4: Detailed evaluation of the methodological quality with AMSTAR**

| Exposure                                       | Reference                         | Comparison    | Q1    | Q2    | Q3    | Q4    | Q5    | Q6    | Q7    | Q8    | Q9    | Q10   | Q11   | All |
|------------------------------------------------|-----------------------------------|---------------|-------|-------|-------|-------|-------|-------|-------|-------|-------|-------|-------|-----|
| <b>DIETARY BEHAVIOURS/DIET QUALITY INDICES</b> |                                   |               |       |       |       |       |       |       |       |       |       |       |       |     |
| Healthy dietary pattern                        | Esposito 2014 <sup>218</sup>      | High v low    | yes 1 | yes 1 | yes 1 | CA 0  | no 0  | yes 1 | yes 1 | no 0  | yes 1 | yes 1 | yes 1 | 8   |
| Healthy eating index (HEI)                     | Schwingshackl 2017 <sup>220</sup> | High v low    | yes 1 | yes 1 | yes 1 | no 0  | no 0  | yes 1 | 9   |
| Alternative healthy eating index (AHEI)        | Schwingshackl 2017 <sup>220</sup> | High v low    | yes 1 | yes 1 | yes 1 | no 0  | no 0  | yes 1 | 9   |
| Dietary approach to stop hypertension (DASH)   | Schwingshackl 2017 <sup>220</sup> | High v low    | yes 1 | yes 1 | yes 1 | no 0  | no 0  | yes 1 | 9   |
| Mediterranean diet                             | Koloverou 2014 <sup>221</sup>     | High v low    | yes 1 | yes 1 | yes 1 | no 0  | yes 1 | yes 1 | yes 1 | no 0  | yes 1 | yes 1 | yes 1 | 9   |
| Vegetarian diet                                | Lee & Park 2017 <sup>222</sup>    | High v low    | yes 1 | yes 1 | yes 1 | no 0  | no 0  | yes 1 | no 0  | no 0  | yes 1 | yes 1 | yes 1 | 7   |
| Low carbohydrate diet                          | Namazi 2017 <sup>223</sup>        | High v low    | yes 1 | yes 1 | yes 1 | no 0  | no 0  | yes 1 | no 0  | 8   |
| Unhealthy dietary pattern                      | Alhazmi 2014 <sup>219</sup>       | High v low    | yes 1 | yes 1 | yes 1 | yes 1 | no 0  | yes 1 | yes 1 | no 0  | yes 1 | yes 1 | yes 1 | 9   |
| Breakfast skipping                             | Bi 2015 <sup>224</sup>            | High v low    | yes 1 | yes 1 | yes 1 | CA 0  | no 0  | yes 1 | yes 1 | no 0  | yes 1 | yes 1 | yes 1 | 8   |
| Glycemic index                                 | Bhupathiraju 2014 <sup>225</sup>  | High v low    | yes 1 | yes 1 | yes 1 | CA 0  | no 0  | yes 1 | yes 1 | no 0  | yes 1 | yes 1 | yes 1 | 8   |
| Glycemic load                                  | Bhupathiraju 2014 <sup>225</sup>  | High v low    | yes 1 | yes 1 | yes 1 | CA 0  | no 0  | yes 1 | yes 1 | no 0  | yes 1 | yes 1 | yes 1 | 8   |
| Dietary acid load                              | Jayedi 2018 <sup>255</sup>        | Dose-response | yes 1 | yes 1 | yes 1 | no 0  | no 0  | yes 1 | 9   |
| <b>FOOD GROUPS, FOODS &amp; BEVERAGES</b>      |                                   |               |       |       |       |       |       |       |       |       |       |       |       |     |
| Total dairy                                    | Schwingshackl 2017 <sup>226</sup> | Dose-response | yes 1 | yes 1 | yes 1 | CA 0  | no 0  | yes 1 | 9   |
| Low-fat dairy products                         | Gijsbers 2016 <sup>227</sup>      | Dose-response | yes 1 | yes 1 | yes 1 | CA 0  | no 0  | yes 1 | yes 1 | no 0  | yes 1 | yes 1 | yes 1 | 8   |
| High-fat dairy products                        | Gijsbers 2016 <sup>227</sup>      | Dose-response | yes 1 | yes 1 | yes 1 | CA 0  | no 0  | yes 1 | yes 1 | no 0  | yes 1 | yes 1 | yes 1 | 8   |
| Milk                                           | Gijsbers 2016 <sup>227</sup>      | Dose-response | yes 1 | yes 1 | yes 1 | CA 0  | no 0  | yes 1 | yes 1 | no 0  | yes 1 | yes 1 | yes 1 | 8   |
| Low-fat milk                                   | Gijsbers 2016 <sup>227</sup>      | Dose-response | yes 1 | yes 1 | yes 1 | CA 0  | no 0  | yes 1 | yes 1 | no 0  | yes 1 | no 0  | yes 1 | 7   |
| High-fat milk                                  | Gijsbers 2016 <sup>227</sup>      | Dose-response | yes 1 | yes 1 | yes 1 | CA 0  | no 0  | yes 1 | yes 1 | no 0  | yes 1 | yes 1 | yes 1 | 8   |
| Yogurt                                         | Gijsbers 2016 <sup>227</sup>      | Dose-response | yes 1 | yes 1 | yes 1 | CA 0  | no 0  | yes 1 | yes 1 | no 0  | yes 1 | yes 1 | yes 1 | 8   |
| Cheese                                         | Gijsbers 2016 <sup>227</sup>      | Dose-response | yes 1 | yes 1 | yes 1 | CA 0  | no 0  | yes 1 | yes 1 | no 0  | yes 1 | yes 1 | yes 1 | 8   |
| Cottage cheese                                 | Aune 2013 <sup>228</sup>          | High v low    | yes 1 | no 0  | yes 1 | no 0  | yes 1 | yes 1 | no 0  | no 0  | yes 1 | NA 0  | yes 1 | 6   |
| Fermented dairy products                       | Gao 2013 <sup>229</sup>           | High v low    | yes 1 | yes 1 | yes 1 | no 0  | no 0  | yes 1 | yes 1 | yes 1 | yes 1 | no 0  | yes 1 | 8   |
| Cream                                          | Gijsbers 2016 <sup>227</sup>      | Dose-response | yes 1 | yes 1 | yes 1 | CA 0  | no 0  | yes 1 | yes 1 | no 0  | yes 1 | no 0  | yes 1 | 7   |
| Ice cream                                      | Gijsbers 2016 <sup>227</sup>      | Dose-response | yes 1 | yes 1 | yes 1 | CA 0  | no 0  | yes 1 | yes 1 | no 0  | yes 1 | no 0  | yes 1 | 7   |
| Sherbet                                        | Gijsbers 2016 <sup>227</sup>      | Dose-response | yes 1 | yes 1 | yes 1 | CA 0  | no 0  | yes 1 | yes 1 | no 0  | yes 1 | no 0  | yes 1 | 7   |
| Chocolate                                      | Yuan 2017 <sup>230</sup>          | Dose-response | yes 1 | yes 1 | yes 1 | no 0  | no 0  | yes 1 | no 0  | 8   |
| Eggs                                           | Schwingshackl 2017 <sup>226</sup> | Dose-response | yes 1 | yes 1 | yes 1 | CA 0  | no 0  | yes 1 | 9   |
| Total meat                                     | Feskens 2013 <sup>231</sup>       | Dose-response | CA 0  | CA 0  | CA 0  | CA 0  | no 0  | no 0  | no 0  | no 0  | yes 1 | yes 1 | yes 1 | 3   |
| Red meat                                       | Schwingshackl 2017 <sup>226</sup> | Dose-response | yes 1 | yes 1 | yes 1 | CA 0  | no 0  | yes 1 | 9   |

Q = Question; Q1: Was an ,a priori' design provided?, Q2: Was there duplicate study selection and data extraction?, Q3: Was a comprehensive literature search performed?, Q4: Was the status of publication (i.e. grey literature) used as an inclusion criterion?, Q5: Was a list of studies (included and excluded) provided?, Q6: Were the characteristics of the included studies provided?, Q7: Was the scientific quality of the included studies assessed and documented?, Q8: Was the scientific quality of the included studies used appropriately in formulation conclusions?, Q9: Were the methods used to combine the findings of studies appropriate?, Q10: Was the likelihood of publication bias assessed?, Q11: Was the conflict of interest included?

**Supplementary Table 4 continued...**

| Exposure                     | Reference                          | Comparison    | Q1    | Q2    | Q3    | Q4    | Q5    | Q6    | Q7    | Q8    | Q9    | Q10   | Q11   | All |
|------------------------------|------------------------------------|---------------|-------|-------|-------|-------|-------|-------|-------|-------|-------|-------|-------|-----|
| Processed meat               | Schwingshackl 2017 <sup>226</sup>  | Dose-response | yes 1 | yes 1 | yes 1 | CA 0  | no 0  | yes 1 | 9   |
| Hamburger                    | Aune 2009 <sup>232</sup>           | High v low    | yes 1 | CA 0  | yes 1 | CA 0  | no 0  | yes 1 | no 0  | no 0  | yes 1 | CA 0  | yes 1 | 5   |
| Bacon                        | Micha 2010 <sup>233</sup>          | High v low    | yes 1 | no 0  | yes 1 | CA 0  | yes 1 | 9   |
| Hot Dogs                     | Micha 2010 <sup>233</sup>          | High v low    | yes 1 | no 0  | yes 1 | CA 0  | yes 1 | 9   |
| Poultry                      | Feskens 2013 <sup>231</sup>        | Dose-response | CA 0  | CA 0  | CA 0  | CA 0  | no 0  | no 0  | no 0  | no 0  | yes 1 | no 0  | yes 1 | 2   |
| Processed red meat           | Pan 2011 <sup>234</sup>            | Dose-response | yes 1 | CA 0  | yes 1 | no 0  | no 0  | yes 1 | no 0  | no 0  | yes 1 | yes 1 | yes 1 | 6   |
| Unprocessed red meat         | Feskens 2013 <sup>231</sup>        | Dose-response | CA 0  | CA 0  | CA 0  | CA 0  | no 0  | no 0  | no 0  | no 0  | yes 1 | no 0  | yes 1 | 2   |
| Total fish/seafood           | Schwingshackl 2017 <sup>226</sup>  | Dose-response | yes 1 | yes 1 | yes 1 | CA 0  | no 0  | yes 1 | 9   |
| Lean fish                    | Zhang 2013 <sup>235</sup>          | High v low    | yes 1 | yes 1 | yes 1 | CA 0  | no 0  | yes 1 | yes 1 | yes 1 | no 0  | yes 1 | yes 1 | 8   |
| Oily fish                    | Zhang 2013 <sup>235</sup>          | High v low    | yes 1 | yes 1 | yes 1 | CA 0  | no 0  | yes 1 | 9   |
| Shellfish                    | Zhang 2013 <sup>235</sup>          | High v low    | yes 1 | yes 1 | yes 1 | CA 0  | no 0  | yes 1 | 9   |
| Fish                         | Zhang 2013 <sup>235</sup>          | High v low    | yes 1 | yes 1 | yes 1 | CA 0  | no 0  | yes 1 | 9   |
| Butter                       | Pimpin 2016 <sup>236</sup>         | Dose-response | yes 1 | 11  |
| Olive oil                    | Schwingshackl 2017b <sup>237</sup> | Dose-response | yes 1 | yes 1 | yes 1 | CA 0  | no 0  | yes 1 | yes 1 | yes 1 | yes 1 | NA 0  | yes 1 | 8   |
| Potatoes                     | Schwingshackl 2018 <sup>238</sup>  | Dose-response | yes 1 | yes 1 | yes 1 | no 0  | yes 1 | yes 1 | no 0  | no 0  | yes 1 | no 0  | yes 1 | 7   |
| French fries                 | Schwingshackl 2018 <sup>238</sup>  | Dose-response | yes 1 | yes 1 | yes 1 | no 0  | yes 1 | yes 1 | no 0  | no 0  | yes 1 | no 0  | yes 1 | 7   |
| Boiled/baked mashed potatoes | Schwingshackl 2018 <sup>238</sup>  | Dose-response | yes 1 | yes 1 | yes 1 | no 0  | yes 1 | yes 1 | no 0  | no 0  | yes 1 | no 0  | yes 1 | 7   |
| Whole grain                  | Schwingshackl 2017 <sup>226</sup>  | Dose-response | yes 1 | yes 1 | yes 1 | CA 0  | no 0  | yes 1 | 9   |
| Refined grain                | Schwingshackl 2017 <sup>226</sup>  | Dose-response | yes 1 | yes 1 | yes 1 | CA 0  | no 0  | yes 1 | 9   |
| Total grains                 | Aune 2013 <sup>239</sup>           | Dose-response | yes 1 | no 0  | yes 1 | CA 0  | no 0  | yes 1 | no 0  | yes 1 | yes 1 | CA 0  | yes 1 | 6   |
| Whole grain bread            | Aune 2013 <sup>239</sup>           | High v low    | yes 1 | no 0  | yes 1 | CA 0  | no 0  | yes 1 | no 0  | yes 1 | yes 1 | CA 0  | yes 1 | 6   |
| Whole grain cereals          | Aune 2013 <sup>239</sup>           | High v low    | yes 1 | no 0  | yes 1 | CA 0  | no 0  | yes 1 | no 0  | yes 1 | yes 1 | CA 0  | yes 1 | 6   |
| Wheat bran                   | Aune 2013 <sup>239</sup>           | High v low    | yes 1 | no 0  | yes 1 | CA 0  | no 0  | yes 1 | no 0  | yes 1 | yes 1 | CA 0  | yes 1 | 6   |
| Wheat germ                   | Aune 2013 <sup>239</sup>           | High v low    | yes 1 | no 0  | yes 1 | CA 0  | no 0  | yes 1 | no 0  | yes 1 | yes 1 | CA 0  | yes 1 | 6   |
| Rice                         | Saneei 2017 <sup>240</sup>         | High v low    | yes 1 | yes 1 | yes 1 | no 0  | no 0  | yes 1 | yes 1 | no 0  | yes 1 | CA 0  | yes 1 | 7   |
| White rice                   | Aune 2013 <sup>239</sup>           | Dose-response | yes 1 | no 0  | yes 1 | CA 0  | no 0  | yes 1 | no 0  | yes 1 | yes 1 | CA 0  | yes 1 | 6   |
| Brown rice                   | Aune 2013 <sup>239</sup>           | Dose-response | yes 1 | no 0  | yes 1 | CA 0  | no 0  | yes 1 | no 0  | yes 1 | yes 1 | CA 0  | yes 1 | 6   |
| Soy products                 | Tian 2017 <sup>241</sup>           | High v low    | yes 1 | CA 0  | yes 1 | no 0  | no 0  | yes 1 | no 0  | no 0  | yes 1 | yes 1 | yes 1 | 6   |
| Legumes                      | Schwingshackl 2017 <sup>226</sup>  | Dose-response | yes 1 | yes 1 | yes 1 | CA 0  | no 0  | yes 1 | 9   |
| Nuts                         | Schwingshackl 2017 <sup>226</sup>  | Dose-response | yes 1 | yes 1 | yes 1 | CA 0  | no 0  | yes 1 | yes 1 | yes 1 | yes 1 | no 0  | yes 1 | 8   |
| Fruits and vegetables        | Li 2014 <sup>242</sup>             | Dose-response | yes 1 | yes 1 | yes 1 | CA 0  | no 0  | yes 1 | yes 1 | yes 1 | yes 1 | no 0  | yes 1 | 8   |
| Fruit total                  | Schwingshackl 2017 <sup>226</sup>  | Dose-response | yes 1 | yes 1 | yes 1 | CA 0  | no 0  | yes 1 | 9   |
| Berry fruits                 | Guo 2016 <sup>243</sup>            | High v low    | yes 1 | yes 1 | yes 1 | CA 0  | no 0  | yes 1 | yes 1 | yes 1 | yes 1 | no 0  | yes 1 | 8   |
| Citrus fruits                | Jia 2016 <sup>244</sup>            | High v low    | yes 1 | yes 1 | yes 1 | no 0  | no 0  | yes 1 | 9   |
| Apples and pears             | Guo 2017 <sup>245</sup>            | Dose-response | yes 1 | yes 1 | yes 1 | CA 0  | no 0  | yes 1 | yes 1 | yes 1 | yes 1 | no 0  | yes 1 | 8   |
| Vegetables total             | Schwingshackl 2017 <sup>226</sup>  | Dose-response | yes 1 | yes 1 | yes 1 | CA 0  | no 0  | yes 1 | 9   |

Q = Question; Q1: Was an „a priori“ design provided?, Q2: Was there duplicate study selection and data extraction?, Q3: Was a comprehensive literature search performed?, Q4: Was the status of publication (i.e. grey literature) used as an inclusion criterion?, Q5: Was a list of studies (included and excluded) provided?, Q6: Were the characteristics of the included studies provided?, Q7: Was the scientific quality of the included studies assessed and documented?, Q8: Was the scientific quality of the included studies used appropriately in formulation conclusions?, Q9: Were the methods used to combine the findings of studies appropriate?, Q10: Was the likelihood of publication bias assessed?, Q11: Was the conflict of interest included?

Supplementary Table 4 continued...

| Exposure                          | Reference                     | Comparison               | Q1    | Q2    | Q3    | Q4    | Q5    | Q6    | Q7    | Q8    | Q9    | Q10   | Q11   | All |
|-----------------------------------|-------------------------------|--------------------------|-------|-------|-------|-------|-------|-------|-------|-------|-------|-------|-------|-----|
| Green leafy vegetables            | Chen 2018 <sup>246</sup>      | Dose-response            | yes 1 | CA 0  | no 0  | no 0  | yes 1 | 8   |
| Cruciferous vegetables            | Chen 2018 <sup>246</sup>      | Dose-response            | yes 1 | CA 0  | no 0  | no 0  | yes 1 | 8   |
| Yellow vegetables                 | Wang 2016 <sup>247</sup>      | High v low               | CA 0  | yes 1 | yes 1 | CA 0  | no 0  | yes 1 | yes 1 | yes 1 | CA 0  | CA 0  | yes 1 | 6   |
| Tea                               | Yang WS 2014 <sup>192</sup>   | High v low               | yes 1 | yes 1 | yes 1 | CA 0  | no 0  | yes 1 | 9   |
| Total coffee                      | Carlström 2018 <sup>249</sup> | High v low               | yes 1 | yes 1 | no 0  | no 0  | no 0  | yes 1 | 8   |
| Caffeinated coffee                | Ding 2014 <sup>250</sup>      | Dose-response            | yes 1 | no 0  | yes 1 | CA 0  | no 0  | yes 1 | 8   |
| Decaffeinated coffee              | Ding 2014 <sup>250</sup>      | Dose-response            | yes 1 | no 0  | yes 1 | CA 0  | no 0  | yes 1 | 8   |
| Sugar sweetened beverages         | Imamura 2015 <sup>251</sup>   | Dose-response            | yes 1 | yes 1 | yes 1 | CA 0  | yes 1 | 10  |
| Artificially sweetened beverages  | Imamura 2015 <sup>251</sup>   | Dose-response            | yes 1 | yes 1 | yes 1 | CA 0  | yes 1 | 10  |
| Total fruit Juice                 | Imamura 2015 <sup>251</sup>   | Dose-response            | yes 1 | yes 1 | yes 1 | CA 0  | yes 1 | 10  |
| Sugar-sweetened fruit juice       | Xi 2014 <sup>252</sup>        | High v low               | yes 1 | yes 1 | yes 1 | CA 0  | no 0  | yes 1 | yes 1 | no 0  | yes 1 | no 0  | yes 1 | 7   |
| 100% fruit juice                  | Xi 2014 <sup>252</sup>        | High v low               | yes 1 | yes 1 | yes 1 | CA 0  | no 0  | yes 1 | yes 1 | no 0  | yes 1 | no 0  | yes 1 | 7   |
| Fruit juice, not specified        | Xi 2014 <sup>252</sup>        | High v low               | yes 1 | yes 1 | yes 1 | CA 0  | no 0  | yes 1 | yes 1 | no 0  | yes 1 | no 0  | yes 1 | 7   |
| Total alcohol                     | Li 2016 <sup>33</sup>         | Non-linear dose-response | yes 1 | yes 1 | yes 1 | no 0  | no 0  | yes 1 | yes 1 | no 0  | yes 1 | yes 1 | yes 1 | 8   |
| Wine                              | Huang 2017 <sup>253</sup>     | Non-linear dose-response | yes 1 | yes 1 | yes 1 | no 0  | no 0  | yes 1 | 9   |
| Beer                              | Huang 2017 <sup>253</sup>     | Non-linear dose-response | yes 1 | yes 1 | yes 1 | no 0  | no 0  | yes 1 | 9   |
| Spirits                           | Huang 2017 <sup>253</sup>     | Non-linear dose-response | yes 1 | yes 1 | yes 1 | no 0  | no 0  | yes 1 | 9   |
| <b>MACRONUTRIENTS</b>             |                               |                          |       |       |       |       |       |       |       |       |       |       |       |     |
| Total protein                     | Zhao 2018 <sup>254</sup>      | Dose-response            | yes 1 | yes 1 | yes 1 | no 0  | yes 1 | 10  |
| Animal protein                    | Zhao 2018 <sup>254</sup>      | Dose-response            | yes 1 | yes 1 | yes 1 | no 0  | yes 1 | 10  |
| Animal protein-to-potassium ratio | Jayedi 2018 <sup>255</sup>    | Dose-response            | yes 1 | yes 1 | yes 1 | no 0  | no 0  | yes 1 | 9   |
| Plant protein                     | Zhao 2018 <sup>254</sup>      | Dose-response            | yes 1 | yes 1 | yes 1 | no 0  | yes 1 | 10  |
| Total fat                         | Alhazmi 2012 <sup>256</sup>   | High v low               | yes 1 | yes 1 | yes 1 | yes 1 | no 0  | yes 1 | 10  |
| Animal fat                        | Alhazmi 2012 <sup>256</sup>   | High v low               | yes 1 | yes 1 | yes 1 | yes 1 | no 0  | yes 1 | 10  |
| Vegetable fat                     | Alhazmi 2012 <sup>256</sup>   | High v low               | yes 1 | yes 1 | yes 1 | yes 1 | no 0  | yes 1 | 10  |
| MUFAs                             | Alhazmi 2012 <sup>256</sup>   | High v low               | yes 1 | yes 1 | yes 1 | yes 1 | no 0  | yes 1 | 10  |

Q = Question; Q1: Was an „a priori“ design provided?, Q2: Was there duplicate study selection and data extraction?, Q3: Was a comprehensive literature search performed?, Q4: Was the status of publication (i.e. grey literature) used as an inclusion criterion?, Q5: Was a list of studies (included and excluded) provided?, Q6: Were the characteristics of the included studies provided?, Q7: Was the scientific quality of the included studies assessed and documented?, Q8: Was the scientific quality of the included studies used appropriately in formulation conclusions?, Q9: Were the methods used to combine the findings of studies appropriate?, Q10: Was the likelihood of publication bias assessed?, Q11: Was the conflict of interest included?

**Supplementary Table 4 continued...**

| Exposure                   | Reference                               | Comparison    | Q1    | Q2    | Q3    | Q4    | Q5   | Q6    | Q7    | Q8    | Q9    | Q10   | Q11   | All |
|----------------------------|-----------------------------------------|---------------|-------|-------|-------|-------|------|-------|-------|-------|-------|-------|-------|-----|
| Total omega-3 fatty acids  | Zhou 2012 <sup>257</sup>                | High v low    | yes 1 | yes 1 | yes 1 | CA 0  | no 0 | yes 1 | yes 1 | no 0  | yes 1 | yes 1 | yes 1 | 8   |
| EPA & DHA                  | Wu 2012 <sup>258</sup>                  | Dose-response | yes 1 | yes 1 | yes 1 | CA 0  | no 0 | yes 1 | yes 1 | yes 1 | yes 1 | CA 0  | yes 1 | 8   |
| EPA                        | Wu 2012 <sup>258</sup>                  | Dose-response | yes 1 | yes 1 | yes 1 | CA 0  | no 0 | yes 1 | yes 1 | yes 1 | yes 1 | CA 0  | yes 1 | 8   |
| DHA                        | Wu 2012 <sup>258</sup>                  | Dose-response | yes 1 | yes 1 | yes 1 | CA 0  | no 0 | yes 1 | yes 1 | yes 1 | yes 1 | CA 0  | yes 1 | 8   |
| ALA                        | Alhazmi 2012 <sup>256</sup>             | High v low    | yes 1 | yes 1 | yes 1 | yes 1 | no 0 | yes 1 | 10  |
| Total omega-6 fatty acids  | Alhazmi 2012 <sup>256</sup>             | High v low    | yes 1 | yes 1 | yes 1 | yes 1 | no 0 | yes 1 | 10  |
| PUFAs                      | Alhazmi 2012 <sup>256</sup>             | High v low    | yes 1 | yes 1 | yes 1 | yes 1 | no 0 | yes 1 | 10  |
| Saturated fatty acids      | De Souza 2015 <sup>259</sup>            | High v low    | yes 1 | yes 1 | yes 1 | CA 0  | no 0 | yes 1 | yes 1 | yes 1 | yes 1 | no 0  | yes 1 | 8   |
| Trans-fatty acids          | De Souza 2015 <sup>259</sup>            | High v low    | yes 1 | yes 1 | yes 1 | CA 0  | no 0 | yes 1 | yes 1 | yes 1 | yes 1 | NA 0  | yes 1 | 8   |
| Ruminant trans-fatty acids | De Souza 2015 <sup>259</sup>            | High v low    | yes 1 | yes 1 | yes 1 | CA 0  | no 0 | yes 1 | yes 1 | yes 1 | yes 1 | no 0  | yes 1 | 8   |
| Cholesterol                | Tajima 2014 <sup>260</sup>              | Dose-response | yes 1 | yes 1 | yes 1 | CA 0  | no 0 | yes 1 | yes 1 | no 0  | no 0  | yes 1 | yes 1 | 7   |
| Total carbohydrates        | Alhazmi 2012 <sup>256</sup>             | High v low    | yes 1 | yes 1 | yes 1 | yes 1 | no 0 | yes 1 | 10  |
| Total sugars               | Tsilas 2017 <sup>261</sup>              | Dose-response | yes 1 | yes 1 | yes 1 | CA 0  | no 0 | yes 1 | yes 1 | yes 1 | yes 1 | NA 0  | yes 1 | 8   |
| Fructose                   | Tsilas 2017 <sup>261</sup>              | Dose-response | yes 1 | yes 1 | yes 1 | CA 0  | no 0 | yes 1 | yes 1 | yes 1 | yes 1 | NA 0  | yes 1 | 8   |
| Glucose                    | Alhazmi 2012 <sup>256</sup>             | High v low    | yes 1 | yes 1 | yes 1 | yes 1 | no 0 | yes 1 | 10  |
| Lactose                    | Alhazmi 2012 <sup>256</sup>             | High v low    | yes 1 | yes 1 | yes 1 | yes 1 | no 0 | yes 1 | 10  |
| Maltose                    | Alhazmi 2012 <sup>256</sup>             | High v low    | yes 1 | yes 1 | yes 1 | yes 1 | no 0 | yes 1 | 10  |
| Sucrose                    | Tsilas 2017 <sup>261</sup>              | Dose-response | yes 1 | yes 1 | yes 1 | CA 0  | no 0 | yes 1 | yes 1 | yes 1 | yes 1 | NA 0  | yes 1 | 8   |
| Total fibre                | Interact Consortium 2015 <sup>262</sup> | Dose-response | yes 1 | yes 1 | yes 1 | CA 0  | no 0 | yes 1 | no 0  | no 0  | yes 1 | yes 1 | yes 1 | 7   |
| Cereal fibre               | Interact Consortium 2015 <sup>262</sup> | Dose-response | yes 1 | yes 1 | yes 1 | CA 0  | no 0 | yes 1 | no 0  | no 0  | yes 1 | yes 1 | yes 1 | 7   |
| Fruit fibre                | Interact Consortium 2015 <sup>262</sup> | Dose-response | yes 1 | yes 1 | yes 1 | CA 0  | no 0 | yes 1 | no 0  | no 0  | yes 1 | yes 1 | yes 1 | 7   |
| Vegetable fibre            | Interact Consortium 2015 <sup>262</sup> | Dose-response | yes 1 | yes 1 | yes 1 | CA 0  | no 0 | yes 1 | no 0  | no 0  | yes 1 | yes 1 | yes 1 | 7   |
| Soluble fibre              | Interact Consortium 2015 <sup>262</sup> | Dose-response | CA 0  | yes 1 | yes 1 | CA 0  | no 0 | yes 1 | no 0  | no 0  | yes 1 | no 0  | yes 1 | 5   |
| Insoluble fibre            | Interact Consortium 2015 <sup>262</sup> | Dose-response | CA 0  | yes 1 | yes 1 | CA 0  | no 0 | yes 1 | no 0  | no 0  | yes 1 | no 0  | yes 1 | 5   |
| <b>MICRONUTRIENTS</b>      |                                         |               |       |       |       |       |      |       |       |       |       |       |       |     |
| Vitamin D                  | Zhao 2013 <sup>263</sup>                | High v low    | yes 1 | yes 1 | yes 1 | yes 1 | no 0 | yes 1 | no 0  | no 0  | yes 1 | yes 1 | no 0  | 7   |
| Total iron                 | Bao 2012 <sup>264</sup>                 | Dose-response | yes 1 | yes 1 | yes 1 | CA 0  | no 0 | yes 1 | no 0  | no 0  | yes 1 | CA 0  | yes 1 | 6   |
| Haem iron                  | Bao 2012 <sup>264</sup>                 | Dose-response | yes 1 | yes 1 | yes 1 | CA 0  | no 0 | yes 1 | no 0  | no 0  | yes 1 | CA 0  | yes 1 | 6   |
| Magnesium                  | Fang Xuexian 2016 <sup>265</sup>        | Dose-response | yes 1 | yes 1 | yes 1 | yes 1 | no 0 | yes 1 | yes 1 | no 0  | yes 1 | yes 1 | yes 1 | 9   |
| Calcium                    | Dong & Qin 2012 <sup>266</sup>          | High v low    | yes 1 | CA 0  | yes 1 | CA 0  | no 0 | yes 1 | no 0  | no 0  | yes 1 | yes 1 | yes 1 | 6   |

Q = Question; Q1: Was an ,a priori' design provided?, Q2: Was there duplicate study selection and data extraction?, Q3: Was a comprehensive literature search performed?, Q4: Was the status of publication (i.e. grey literature) used as an inclusion criterion?, Q5: Was a list of studies (included and excluded) provided?, Q6: Were the characteristics of the included studies provided?, Q7: Was the scientific quality of the included studies assessed and documented?, Q8: Was the scientific quality of the included studies used appropriately in formulation conclusions?, Q9: Were the methods used to combine the findings of studies appropriate?, Q10: Was the likelihood of publication bias assessed?, Q11: Was the conflict of interest included?



**Supplementary Table 4 continued...**

| Exposure          | Reference                          | Comparison    | Q1    | Q2    | Q3    | Q4   | Q5    | Q6    | Q7    | Q8    | Q9    | Q10   | Q11   | All |
|-------------------|------------------------------------|---------------|-------|-------|-------|------|-------|-------|-------|-------|-------|-------|-------|-----|
| Total polyphenols | Rienks et al (2018) <sup>267</sup> | High v low    | yes 1 | yes 1 | yes 1 | no 0 | no 0  | yes 1 | yes 1 | no 0  | yes 1 | yes 1 | yes 1 | 8   |
| Flavonoids        | Rienks et al (2018) <sup>267</sup> | Dose-response | yes 1 | yes 1 | yes 1 | no 0 | no 0  | yes 1 | yes 1 | no 0  | yes 1 | yes 1 | yes 1 | 8   |
| Anthocyanins      | Guo 2016 <sup>243</sup>            | Dose-response | yes 1 | yes 1 | yes 1 | CA 0 | no 0  | yes 1 | yes 1 | yes 1 | yes 1 | no 0  | yes 1 | 8   |
| Flavanols         | Rienks et al (2018) <sup>267</sup> | High v low    | yes 1 | yes 1 | yes 1 | no 0 | no 0  | yes 1 | yes 1 | no 0  | yes 1 | yes 1 | yes 1 | 8   |
| Flavan-3-ols      | Rienks et al (2018) <sup>267</sup> | Dose-response | yes 1 | yes 1 | yes 1 | no 0 | no 0  | yes 1 | yes 1 | no 0  | yes 1 | yes 1 | yes 1 | 8   |
| Catechin          | Rienks et al (2018) <sup>267</sup> | High v low    | yes 1 | yes 1 | yes 1 | no 0 | no 0  | yes 1 | yes 1 | no 0  | yes 1 | yes 1 | yes 1 | 8   |
| Proanthocyanids   | Rienks et al (2018) <sup>267</sup> | High v low    | yes 1 | yes 1 | yes 1 | no 0 | no 0  | yes 1 | yes 1 | no 0  | yes 1 | yes 1 | yes 1 | 8   |
| Flavanones        | Rienks et al (2018) <sup>267</sup> | High v low    | yes 1 | yes 1 | yes 1 | no 0 | no 0  | yes 1 | yes 1 | no 0  | yes 1 | yes 1 | yes 1 | 8   |
| Flavones          | Rienks et al (2018) <sup>267</sup> | Dose-response | yes 1 | yes 1 | yes 1 | no 0 | no 0  | yes 1 | yes 1 | no 0  | yes 1 | yes 1 | yes 1 | 8   |
| Luteolin          | Rienks et al (2018) <sup>267</sup> | Dose-response | yes 1 | yes 1 | yes 1 | no 0 | no 0  | yes 1 | yes 1 | no 0  | yes 1 | yes 1 | yes 1 | 8   |
| Flavonoles        | Rienks et al (2018) <sup>267</sup> | Dose-response | yes 1 | yes 1 | yes 1 | no 0 | no 0  | yes 1 | yes 1 | no 0  | yes 1 | yes 1 | yes 1 | 8   |
| Quercetin         | Rienks et al (2018) <sup>267</sup> | Dose-response | yes 1 | yes 1 | yes 1 | no 0 | no 0  | yes 1 | yes 1 | no 0  | yes 1 | yes 1 | yes 1 | 8   |
| Kaempferol        | Rienks et al (2018) <sup>267</sup> | Dose-response | yes 1 | yes 1 | yes 1 | no 0 | no 0  | yes 1 | yes 1 | no 0  | yes 1 | yes 1 | yes 1 | 8   |
| Myricetin         | Rienks et al (2018) <sup>267</sup> | High v low    | yes 1 | yes 1 | yes 1 | no 0 | no 0  | yes 1 | yes 1 | no 0  | yes 1 | yes 1 | yes 1 | 8   |
| Isoflavones       | Rienks et al (2018) <sup>267</sup> | Dose-response | yes 1 | yes 1 | yes 1 | no 0 | no 0  | yes 1 | yes 1 | no 0  | yes 1 | yes 1 | yes 1 | 8   |
| Daidzein          | Rienks et al (2018) <sup>267</sup> | Dose-response | yes 1 | yes 1 | yes 1 | no 0 | no 0  | yes 1 | yes 1 | no 0  | yes 1 | yes 1 | yes 1 | 8   |
| Genistein         | Rienks et al (2018) <sup>267</sup> | Dose-response | yes 1 | yes 1 | yes 1 | no 0 | no 0  | yes 1 | yes 1 | no 0  | yes 1 | yes 1 | yes 1 | 8   |
| Dihydrochalcones  | Rienks et al (2018) <sup>267</sup> | Dose-response | yes 1 | yes 1 | yes 1 | no 0 | no 0  | yes 1 | yes 1 | no 0  | yes 1 | yes 1 | yes 1 | 8   |
| Phenolic acids    | Rienks et al (2018) <sup>267</sup> | Dose-response | yes 1 | yes 1 | yes 1 | no 0 | no 0  | yes 1 | yes 1 | no 0  | yes 1 | yes 1 | yes 1 | 8   |
| Stilbenes         | Rienks et al (2018) <sup>267</sup> | Dose-response | yes 1 | yes 1 | yes 1 | no 0 | no 0  | yes 1 | yes 1 | no 0  | yes 1 | yes 1 | yes 1 | 8   |
| Lignans           | Rienks et al (2018) <sup>267</sup> | Dose-response | yes 1 | yes 1 | yes 1 | no 0 | no 0  | yes 1 | yes 1 | no 0  | yes 1 | yes 1 | yes 1 | 8   |
| Others            | Rienks et al (2018) <sup>267</sup> | Dose-response | yes 1 | yes 1 | yes 1 | no 0 | no 0  | yes 1 | yes 1 | no 0  | yes 1 | yes 1 | yes 1 | 8   |
| Vitamin E         | Hamer & Chida 2007 <sup>268</sup>  | High v low    | yes 1 | CA 0  | yes 1 | CA 0 | yes 1 | CA 0  | yes 1 | 8   |
| Vitamin C         | Hamer & Chida 2007 <sup>268</sup>  | High v low    | yes 1 | CA 0  | yes 1 | CA 0 | yes 1 | CA 0  | yes 1 | 8   |
| Lycopene          | Hamer & Chida 2007 <sup>268</sup>  | High v low    | yes 1 | CA 0  | yes 1 | CA 0 | yes 1 | CA 0  | yes 1 | 8   |
| Caffeine          | Ding 2014 <sup>250</sup>           | Dose-response | no 0  | no 0  | yes 1 | CA 0 | no 0  | yes 1 | yes 1 | yes 1 | yes 1 | CA 0  | yes 1 | 6   |

Q = Question; Q1: Was an 'a priori' design provided?, Q2: Was there duplicate study selection and data extraction?, Q3: Was a comprehensive literature search performed?, Q4: Was the status of publication (i.e. grey literature) used as an inclusion criterion?, Q5: Was a list of studies (included and excluded) provided?, Q6: Were the characteristics of the included studies provided?, Q7: Was the scientific quality of the included studies assessed and documented?, Q8: Was the scientific quality of the included studies used appropriately in formulation conclusions?, Q9: Were the methods used to combine the findings of studies appropriate?, Q10: Was the likelihood of publication bias assessed?, Q11: Was the conflict of interest included?

**Supplementary Table 5: Scoring for the different components of NutriGrade\* for each exposure**

| Exposure                                       | Reference                         | Comparison             | Risk of bias | Precision | Heterogeneity | Directness | Publication bias | Funding bias | Effect size | Dose-response | Sum | NutriGrade |
|------------------------------------------------|-----------------------------------|------------------------|--------------|-----------|---------------|------------|------------------|--------------|-------------|---------------|-----|------------|
| <b>DIETARY BEHAVIOURS/DIET QUALITY INDICES</b> |                                   |                        |              |           |               |            |                  |              |             |               |     |            |
| Healthy dietary pattern                        | Esposito 2014 <sup>218</sup>      | High v low             | 2            | 1         | 0,8           | 1          | 1                | 0,5          | 1           | 0             | 7,3 | Moderate   |
| Healthy eating index (HEI)                     | Schwingshackl 2017 <sup>220</sup> | High v low             | 2            | 1         | 0             | 1          | 0                | 1            | 0           | 0             | 5   | Low        |
| Alternative healthy eating index (AHEI)        | Schwingshackl 2017 <sup>220</sup> | High v low             | 1,5          | 1         | 0,5           | 1          | 0,5              | 1            | 1           | 0             | 6,5 | Moderate   |
| Dietary approach to stop hypertension (DASH)   | Schwingshackl 2017 <sup>220</sup> | High v low             | 1,5          | 1         | 0,5           | 1          | 0,5              | 1            | 0           | 0             | 5,5 | Low        |
| Mediterranean diet                             | Koloverou 2014 <sup>221</sup>     | High v low             | 2            | 1         | 0,4           | 1          | 0,5              | 1            | 0           | 0             | 5,9 | Low        |
| Vegetarian diet                                | Lee & Park 2017 <sup>222</sup>    | Vegetarian v omnivores | 1            | 0         | 0             | 1          | 0                | 1            | 1           | 0             | 4   | Low        |
| Low carbohydrate diet                          | Namazi 2017 <sup>223</sup>        | High v low             | 1,5          | 0         | 0             | 1          | 0                | 1            | 0           | 0             | 3,5 | Very low   |
| Unhealthy dietary pattern                      | Alhazmi 2014 <sup>219</sup>       | High v low             | 1,5          | 1         | 0,8           | 1          | 1                | 1            | 1           | 0             | 7,3 | Moderate   |
| Breakfast skipping                             | Bi 2015 <sup>224</sup>            | Everyday v never       | 2            | 0         | 0             | 1          | 0                | 1            | 1           | 0             | 5   | Low        |
| Glycemic index                                 | Bhupathiraju 2014 <sup>225</sup>  | High v low             | 1,5          | 1         | 0,8           | 1          | 0                | 1            | 0           | 0             | 5,3 | Low        |
| Glycemic load                                  | Bhupathiraju 2014 <sup>225</sup>  | High v low             | 1,5          | 1         | 0,8           | 1          | 1                | 1            | 0           | 0             | 6,3 | Moderate   |
| Dietary acid load                              | Jayedi 2018 <sup>255</sup>        | Dose-response          | 2            | 1         | 0,4           | 1          | 0,5              | 1            | 0           | 1             | 6,9 | Moderate   |
| <b>FOOD GROUPS, FOODS &amp; BEVERAGES</b>      |                                   |                        |              |           |               |            |                  |              |             |               |     |            |
| Total dairy                                    | Schwingshackl 2017 <sup>226</sup> | Dose-response          | 1,5          | 1         | 1             | 1          | 0,5              | 1            | 0           | 1             | 7   | Moderate   |
| Low-fat dairy products                         | Gijsbers 2016 <sup>227</sup>      | Dose-response          | 1,5          | 1         | 0,8           | 1          | 1                | 0,5          | 0           | 0             | 5,8 | Low        |
| High-fat dairy products                        | Gijsbers 2016 <sup>227</sup>      | Dose-response          | 1,5          | 1         | 0,8           | 1          | 1                | 0,5          | 0           | 0             | 5,8 | Low        |
| Milk                                           | Gijsbers 2016 <sup>227</sup>      | Dose-response          | 1            | 1         | 0,8           | 1          | 1                | 0,5          | 0           | 0             | 5,3 | Low        |
| Low-fat milk                                   | Gijsbers 2016 <sup>227</sup>      | Dose-response          | 1,5          | 1         | 0,4           | 1          | 0                | 0,5          | 0           | 0             | 4,4 | Low        |
| High-fat milk                                  | Gijsbers 2016 <sup>227</sup>      | Dose-response          | 1,5          | 1         | 0,4           | 1          | 0                | 0,5          | 0           | 0             | 4,4 | Low        |
| Yogurt                                         | Gijsbers 2016 <sup>227</sup>      | Dose-response          | 1            | 1         | 0,8           | 1          | 1                | 0,5          | 0           | 1             | 6,3 | Moderate   |
| Cheese                                         | Gijsbers 2016 <sup>227</sup>      | Dose-response          | 1,5          | 1         | 0,4           | 1          | 0,5              | 0,5          | 0           | 0             | 4,9 | Low        |
| Cottage cheese                                 | Aune 2013 <sup>228</sup>          | High v low             | 1,5          | 0         | 0             | 1          | 0                | 1            | 0           | 0             | 3,5 | Very low   |
| Fermented dairy products                       | Gao 2013 <sup>229</sup>           | High v low             | 1,5          | 1         | 0             | 1          | 0                | 1            | 0           | 0             | 4,5 | Low        |
| Cream                                          | Gijsbers 2016 <sup>227</sup>      | Dose-response          | 1,5          | 1         | 0,8           | 1          | 1                | 0,5          | 0           | 0             | 5,8 | Low        |
| Ice cream                                      | Gijsbers 2016 <sup>227</sup>      | Dose-response          | 2            | 1         | 0             | 1          | 0                | 0,5          | 0           | 1             | 5,5 | Low        |
| Sherbet                                        | Gijsbers 2016 <sup>227</sup>      | Dose-response          | 2            | 1         | 0             | 1          | 0                | 0,5          | 0           | 0             | 4,5 | Low        |
| Chocolate                                      | Yuan 2017 <sup>230</sup>          | Dose-response          | 2            | 1         | 0             | 1          | 0                | 1            | 0           | 0             | 5   | Moderate   |
| Eggs                                           | Schwingshackl 2017 <sup>226</sup> | Dose-response          | 1,5          | 0         | 1             | 0,5        | 1                | 1            | 0           | 0             | 5   | Low        |
| Total meat                                     | Feskens 2013 <sup>231</sup>       | Dose-response          | 2            | 1         | 0,4           | 1          | 0,5              | 1            | 0           | 1             | 6,9 | Moderate   |

Supplementary Table 5 continued...

| Exposure                     | Reference                         | Comparison    | Risk of bias | Precision | Heterogeneity | Directness | Publication bias | Funding bias | Effect size | Dose-response | Sum | NutriGrade |
|------------------------------|-----------------------------------|---------------|--------------|-----------|---------------|------------|------------------|--------------|-------------|---------------|-----|------------|
| Red meat                     | Schwingshackl 2017 <sup>226</sup> | Dose-response | 2            | 1         | 1             | 1          | 1                | 1            | 0           | 1             | 8   | High       |
| Processed meat               | Schwingshackl 2017 <sup>226</sup> | Dose-response | 2            | 1         | 1             | 1          | 0,5              | 1            | 1           | 1             | 8,5 | High       |
| Hamburger                    | Aune 2009 <sup>232</sup>          | Dose-response | 1,5          | 0         | 0             | 1          | 0                | 1            | 0           | 1             | 4,5 | Low        |
| Bacon                        | Micha 2010 <sup>233</sup>         | Dose-response | 2            | 1         | 0             | 1          | 0                | 1            | 2           | 1             | 8   | High       |
| Hot Dogs                     | Micha 2010 <sup>233</sup>         | Dose-response | 2            | 1         | 0             | 1          | 0                | 1            | 1           | 1             | 7   | Moderate   |
| Poultry                      | Feskens 2013 <sup>231</sup>       | Dose-response | 2            | 0         | 0             | 1          | 0                | 1            | 0           | 0             | 4   | Low        |
| Processed red meat           | Pan 2011 <sup>234</sup>           | Dose-response | 1            | 1         | 0,4           | 1          | 0                | 1            | 1           | 1             | 6,4 | Moderate   |
| Unprocessed red meat         | Feskens 2013 <sup>231</sup>       | Dose-response | 2            | 0         | 0,8           | 1          | 0,5              | 1            | 0           | 0             | 5,3 | Low        |
| Total fish/seafood           | Schwingshackl 2017 <sup>226</sup> | Dose-response | 1,5          | 0         | 1             | 0,5        | 1                | 1            | 0           | 0             | 5   | Low        |
| Lean fish                    | Zhang 2013 <sup>235</sup>         | High v low    | 1,5          | 1         | 0             | 1          | 0                | 1            | 0           | 0             | 4,5 | Low        |
| Oily fish                    | Zhang 2013 <sup>235</sup>         | High v low    | 1,5          | 1         | 0             | 1          | 0                | 1            | 0           | 0             | 4,5 | Low        |
| Shellfish                    | Zhang 2013 <sup>235</sup>         | High v low    | 2            | 0         | 0             | 1          | 0                | 1            | 0           | 0             | 4   | Low        |
| Fish                         | Zhang 2013 <sup>235</sup>         | High v low    | 1,5          | 0         | 0,4           | 1          | 0,5              | 1            | 0           | 0             | 4,4 | Low        |
| Butter                       | Pimpin 2016 <sup>236</sup>        | Dose-response | 1,5          | 0         | 0,4           | 1          | 0,5              | 1            | 0           | 0             | 4,4 | Low        |
| Olive oil                    | Schwingshackl 2017 <sup>237</sup> | Dose-response | 1,5          | 1         | 0             | 1          | 0                | 1            | 0           | 1             | 5,5 | Low        |
| Potatoes                     | Schwingshackl 2018 <sup>238</sup> | Dose-response | 1,5          | 1         | 0,4           | 1          | 0                | 1            | 0           | 1             | 5,9 | Low        |
| French fries                 | Schwingshackl 2018 <sup>238</sup> | Dose-response | 1,5          | 1         | 0             | 1          | 0                | 1            | 1           | 1             | 6,5 | Moderate   |
| Boiled/baked mashed potatoes | Schwingshackl 2018 <sup>238</sup> | Dose-response | 1,5          | 1         | 0             | 1          | 0                | 1            | 0           | 1             | 5,5 | Low        |
| Whole grain                  | Schwingshackl 2017 <sup>226</sup> | Dose-response | 2            | 1         | 1             | 1          | 1                | 1            | 0           | 1             | 8   | High       |
| Refined grain                | Schwingshackl 2017 <sup>226</sup> | Dose-response | 1,5          | 1         | 1             | 1          | 1                | 1            | 0           | 0             | 6,5 | Moderate   |
| Total grains                 | Aune 2013 <sup>239</sup>          | Dose-response | 1,5          | 0         | 0             | 1          | 0                | 1            | 0           | 1             | 4,5 | Low        |
| Whole grain bread            | Aune 2013 <sup>239</sup>          | Dose-response | 1,5          | 0         | 0             | 1          | 0                | 1            | 1           | 1             | 5,5 | Low        |
| Whole grain cereals          | Aune 2013 <sup>239</sup>          | Dose-response | 1,5          | 0         | 0             | 1          | 0                | 1            | 1           | 1             | 5,5 | Low        |
| Wheat bran                   | Aune 2013 <sup>239</sup>          | Dose-response | 1,5          | 1         | 0             | 1          | 0                | 1            | 1           | 1             | 6,5 | Moderate   |
| Wheat germ                   | Aune 2013 <sup>239</sup>          | Dose-response | 1,5          | 1         | 0             | 1          | 0                | 1            | 0           | 0             | 4,5 | Low        |
| Rice                         | Saneei 2017 <sup>240</sup>        | High v low    | 1,5          | 0         | 0,4           | 1          | 0,5              | 1            | 0           | 0             | 4,4 | Low        |
| White rice                   | Aune 2013 <sup>239</sup>          | Dose-response | 1,5          | 1         | 0,4           | 1          | 0                | 1            | 1           | 1             | 6,9 | Moderate   |
| Brown rice                   | Aune 2013 <sup>239</sup>          | Dose-response | 1,5          | 1         | 0             | 1          | 0                | 1            | 0           | 1             | 5,5 | Low        |
| Soy products                 | Tian 2017 <sup>241</sup>          | High v low    | 1            | 0         | 0,4           | 1          | 0,5              | 0,5          | 0           | 0             | 3,4 | Very low   |
| Legumes                      | Schwingshackl 2017 <sup>226</sup> | Dose-response | 1,5          | 1         | 1             | 0,5        | 0,5              | 1            | 0           | 0             | 5,5 | Low        |
| Nuts                         | Schwingshackl 2017 <sup>226</sup> | Dose-response | 1,5          | 1         | 0,5           | 1          | 0,5              | 1            | 0           | 0             | 5,5 | Low        |
| Fruits and vegetables        | Li 2014 <sup>242</sup>            | Dose-response | 1            | 1         | 0             | 1          | 0                | 1            | 0           | 0             | 4   | Low        |
| Fruit total                  | Schwingshackl 2017 <sup>226</sup> | Dose-response | 1,5          | 1         | 1             | 1          | 1                | 1            | 0           | 0             | 6,5 | Moderate   |
| Berry fruits                 | Guo 2016 <sup>243</sup>           | Dose-response | 1,5          | 1         | 0             | 1          | 0                | 1            | 0           | 1             | 5,5 | Low        |
| Citrus fruits                | Jia 2016 <sup>244</sup>           | High v low    | 1            | 0         | 0,4           | 1          | 0,5              | 1            | 0           | 0             | 3,9 | Very low   |
| Apples and pears             | Guo 2017 <sup>245</sup>           | Dose-response | 1,5          | 1         | 0             | 1          | 0                | 1            | 0           | 1             | 5,5 | Low        |
| Vegetables total             | Schwingshackl 2017 <sup>226</sup> | Dose-response | 1,5          | 1         | 1             | 1          | 1                | 1            | 0           | 0             | 6,5 | Moderate   |

Supplementary Table 5 continued...

| Exposure                          | Reference                     | Comparison               | Risk of bias | Precision | Heterogeneity | Directness | Publication bias | Funding bias | Effect size | Dose-response | Sum | NutriGrade |
|-----------------------------------|-------------------------------|--------------------------|--------------|-----------|---------------|------------|------------------|--------------|-------------|---------------|-----|------------|
| Green leafy vegetables            | Chen 2018 <sup>246</sup>      | Dose-response            | 1            | 1         | 0,4           | 1          | 0,5              | 1            | 0           | 0             | 4,9 | Low        |
| Cruciferous vegetables            | Chen 2018 <sup>246</sup>      | Dose-response            | 2            | 1         | 0             | 1          | 0                | 1            | 0           | 0             | 5   | Low        |
| Yellow vegetables                 | Wang 2016 <sup>247</sup>      | High v low               | 1            | 0         | 0             | 1          | 0                | 1            | 1           | 0             | 4   | Low        |
| Tea                               | Yang WS 2014 <sup>192</sup>   | Dose-response            | 1,5          | 1         | 0,8           | 1          | 1                | 1            | 0           | 1             | 7,3 | Moderate   |
| Total coffee                      | Carlström 2018 <sup>249</sup> | Dose-response            | 1,5          | 1         | 0,8           | 1          | 1                | 1            | 0           | 1             | 7,3 | Moderate   |
| Caffeinated coffee                | Ding 2014 <sup>250</sup>      | Dose-response            | 1            | 1         | 0,8           | 1          | 1                | 1            | 0           | 1             | 6,8 | Moderate   |
| Decaffeinated coffee              | Ding 2014 <sup>250</sup>      | Dose-response            | 1            | 1         | 0,8           | 1          | 1                | 1            | 0           | 1             | 6,8 | Moderate   |
| Sugar sweetened beverages         | Imamura 2015 <sup>251</sup>   | Dose-response            | 1,5          | 1         | 0,8           | 1          | 1                | 1            | 1           | 1             | 8,3 | High       |
| Artificially sweetened beverages  | Imamura 2015 <sup>251</sup>   | Dose-response            | 1,5          | 1         | 0,4           | 1          | 0                | 1            | 1           | 1             | 6,9 | Moderate   |
| Total fruit Juice                 | Imamura 2015 <sup>251</sup>   | Dose-response            | 1,5          | 1         | 0,4           | 1          | 0                | 1            | 0           | 1             | 5,9 | Low        |
| Sugar-sweetened fruit juice       | Xi 2014 <sup>252</sup>        | High v low               | 1,5          | 1         | 0             | 1          | 0                | 1            | 1           | 0             | 5,5 | Low        |
| 100% fruit juice                  | Xi 2014 <sup>252</sup>        | High v low               | 1,5          | 0         | 0             | 1          | 0                | 1            | 0           | 0             | 3,5 | Very low   |
| Fruit juice, not specified        | Xi 2014 <sup>252</sup>        | High v low               | 1,5          | 0         | 0             | 1          | 0                | 1            | 0           | 0             | 3,5 | Very low   |
| Total alcohol                     | Li 2016 <sup>33</sup>         | Non-linear dose-response | 1,5          | 1         | 0,8           | 1          | 1                | 1            | 0           | 1             | 7,3 | Moderate   |
| Total alcohol                     | Li 2016 <sup>33</sup>         |                          | 1,5          | 1         | 0,8           | 1          | 1                | 1            | 1           | 1             | 8,3 | High       |
| Total alcohol                     | Li 2016 <sup>33</sup>         |                          | 1,5          | 1         | 0,8           | 1          | 1                | 1            | 0           | 0             | 6,3 | Moderate   |
| Wine                              | Huang 2017 <sup>253</sup>     | Non-linear dose-response | 1            | 1         | 0,4           | 1          | 0                | 1            | 0           | 1             | 5,4 | Low        |
| Wine                              | Huang 2017 <sup>253</sup>     |                          | 1            | 1         | 0,4           | 1          | 0                | 1            | 0           | 1             | 5,4 | Low        |
| Wine                              | Huang 2017 <sup>253</sup>     |                          | 1            | 1         | 0,4           | 1          | 0                | 1            | 0           | 1             | 5,4 | Low        |
| Beer                              | Huang 2017 <sup>253</sup>     | Non-linear dose-response | 1            | 1         | 0,4           | 1          | 1                | 1            | 0           | 0             | 5,4 | Low        |
| Beer                              | Huang 2017 <sup>253</sup>     |                          | 1            | 1         | 0,4           | 1          | 1                | 1            | 0           | 1             | 6,4 | Moderate   |
| Beer                              | Huang 2017 <sup>253</sup>     |                          | 1            | 1         | 0,4           | 1          | 1                | 1            | 0           | 0             | 5,4 | Low        |
| Spirits                           | Huang 2017 <sup>253</sup>     | Non-linear dose-response | 1            | 1         | 0,4           | 1          | 1                | 1            | 0           | 0             | 5,4 | Low        |
| Spirits                           | Huang 2017 <sup>253</sup>     |                          | 1            | 1         | 0,4           | 1          | 1                | 1            | 0           | 0             | 5,4 | Low        |
| Spirits                           | Huang 2017 <sup>253</sup>     |                          | 1            | 0         | 0             | 1          | 1                | 1            | 1           | 0             | 5   | Low        |
| <b>MACRONUTRIENTS</b>             |                               |                          |              |           |               |            |                  |              |             |               |     |            |
| Total protein                     | Zhao 2018 <sup>254</sup>      | Dose-response            | 1,5          | 1         | 0,4           | 1          | 0,5              | 1            | 0           | 1             | 6,4 | Moderate   |
| Animal protein                    | Zhao 2018 <sup>254</sup>      | Dose-response            | 1,5          | 1         | 0,4           | 1          | 0,5              | 1            | 0           | 1             | 6,4 | Moderate   |
| Animal protein-to-potassium ratio | Jayedi 2018 <sup>255</sup>    | Dose-response            | 2            | 1         | 0             | 1          | 0                | 1            | 0           | 1             | 6   | Moderate   |
| Plant protein                     | Zhao 2018 <sup>254</sup>      | Dose-response            | 1,5          | 1         | 0,4           | 1          | 0,5              | 1            | 0           | 0             | 5,4 | Low        |
| Total fat                         | Alhazmi 2012 <sup>256</sup>   | High v low               | 1,5          | 1         | 0             | 1          | 0                | 1            | 0           | 0             | 4,5 | Low        |
| Animal fat                        | Alhazmi 2012 <sup>256</sup>   | High v low               | 1,5          | 1         | 0,4           | 1          | 0,5              | 1            | 0           | 0             | 5,4 | Low        |
| Vegetable fat                     | Alhazmi 2012 <sup>256</sup>   | High v low               | 1,5          | 1         | 0,4           | 1          | 0,5              | 1            | 1           | 0             | 6,4 | Moderate   |
| MUFAs                             | Alhazmi 2012 <sup>256</sup>   | High v low               | 1,5          | 1         | 0,4           | 1          | 0,5              | 1            | 0           | 0             | 5,4 | Low        |

Supplementary Table 5 continued...

| Exposure                   | Reference                               | Comparison    | Risk of bias | Precision | Heterogeneity | Directness | Publication bias | Funding bias | Effect size | Dose-response | Sum  | NutriGrade |
|----------------------------|-----------------------------------------|---------------|--------------|-----------|---------------|------------|------------------|--------------|-------------|---------------|------|------------|
| Total omega-3 fatty acids  | Zhou 2012 <sup>257</sup>                | High v low    | 1            | 1         | 0,4           | 1          | 0,5              | 1            | 0           | 0             | 4,9  | Low        |
| EPA & DHA                  | Wu 2012 <sup>258</sup>                  | Dose-response | 2            | 1         | 0,8           | 1          | 0,5              | 0            | 0           | 0             | 5,3  | Low        |
| EPA                        | Wu 2012 <sup>258</sup>                  | Dose-response | 2            | 0         | 0             | 1          | 0,5              | 1            | 0           | 0             | 4,5  | Low        |
| DHA                        | Wu 2012 <sup>258</sup>                  | Dose-response | 2            | 0         | 0             | 1          | 0,5              | 1            | 0           | 0             | 4,5  | Low        |
| ALA                        | Alhazmi 2012 <sup>256</sup>             | High v low    | 1,5          | 1         | 0,2           | 1          | 0,5              | 1            | 0           | 0             | 5,2  | Low        |
| Total omega-6 fatty acids  | Alhazmi 2012 <sup>256</sup>             | High v low    | 1,5          | 0         | 0             | 1          | 0                | 1            | 0           | 0             | 3,5  | Very low   |
| PUFAs                      | Alhazmi 2012 <sup>256</sup>             | High v low    | 1,5          | 1         | 0             | 1          | 0,5              | 1            | 0           | 0             | 5    | Low        |
| Saturated fatty acids      | De Souza 2015 <sup>259</sup>            | High v low    | 1            | 1         | 0,4           | 1          | 0                | 0,5          | 0           | 0             | 3,9  | Very low   |
| Trans-fatty acids          | De Souza 2015 <sup>259</sup>            | High v low    | 1,5          | 0         | 0,4           | 1          | 0                | 0,5          | 0           | 0             | 3,4  | Very low   |
| Ruminant trans-fatty acids | De Souza 2015 <sup>259</sup>            | High v low    | 2            | 0         | 0             | 1          | 0                | 0,5          | 1           | 0             | 4,5  | Low        |
| Cholesterol                | Tajima 2014 <sup>260</sup>              | Dose-response | 1            | 1         | 0             | 1          | 0                | 1            | 0           | 1             | 5    | Low        |
| Total carbohydrates        | Alhazmi 2012 <sup>256</sup>             | High v low    | 1,5          | 1         | 0,4           | 1          | 0,5              | 1            | 0           | 0             | 5,4  | Low        |
| Total sugars               | Tsilas 2017 <sup>261</sup>              | Dose-response | 1,5          | 0         | 0             | 1          | 0                | 0            | 0           | 0             | 2,5  | Very low   |
| Fructose                   | Tsilas 2017 <sup>261</sup>              | Dose-response | 2            | 0         | 0             | 1          | 0                | 0            | 0           | 0             | 3    | Very low   |
| Glucose                    | Alhazmi 2012 <sup>256</sup>             | High v low    | 1,5          | 0         | 0             | 1          | 0                | 1            | 0           | 0             | 3,5  | Very low   |
| Lactose                    | Alhazmi 2012 <sup>256</sup>             | High v low    | 1,5          | 0         | 0             | 1          | 0                | 1            | 0           | 0             | 3,5  | Very low   |
| Maltose                    | Alhazmi 2012 <sup>256</sup>             | High v low    | 1,5          | 0         | 0             | 1          | 0                | 1            | 0           | 0             | 3,5  | Very low   |
| Sucrose                    | Tsilas 2017 <sup>261</sup>              | Dose-response | 2            | 1         | 0             | 1          | 0                | 0            | 0           | 1             | 5    | Low        |
| Total fibre                | Interact Consortium 2015 <sup>262</sup> | Dose-response | 1,75         | 1         | 0,8           | 1          | 1                | 1            | 0           | 1             | 7,55 | Moderate   |
| Cereal fibre               | Interact Consortium 2015 <sup>262</sup> | Dose-response | 1,75         | 1         | 0,8           | 1          | 1                | 1            | 1           | 1             | 8,55 | High       |
| Fruit fibre                | Interact Consortium 2015 <sup>262</sup> | Dose-response | 1,75         | 1         | 0,8           | 1          | 1                | 1            | 0           | 0             | 6,55 | Moderate   |
| Vegetable fibre            | Interact Consortium 2015 <sup>262</sup> | Dose-response | 1,75         | 1         | 0,8           | 1          | 1                | 1            | 0           | 0             | 6,55 | Moderate   |
| Soluble fibre              | Interact Consortium 2015 <sup>262</sup> | Dose-response | 1,75         | 0         | 0             | 1          | 0                | 1            | 1           | 0             | 4,75 | Low        |
| Insoluble fibre            | Interact Consortium 2015 <sup>262</sup> | Dose-response | 1,75         | 0         | 0             | 1          | 0                | 1            | 1           | 1             | 5,75 | Low        |
| <b>MICRONUTRIENTS</b>      |                                         |               |              |           |               |            |                  |              |             |               |      |            |
| Vitamin D                  | Zhao 2013 <sup>263</sup>                | High v low    | 1            | 1         | 0             | 1          | 0                | 0,5          | 0           | 0             | 3,5  | Very low   |
| Total iron                 | Bao 2012 <sup>264</sup>                 | Dose-response | 1,5          | 1         | 0             | 1          | 0                | 1            | 0           | 0             | 4,5  | Low        |
| Haem iron                  | Bao 2012 <sup>264</sup>                 | Dose-response | 1,5          | 1         | 0             | 1          | 0                | 1            | 0           | 1             | 5,5  | Low        |
| Magnesium                  | Fang Xuexian 2016 <sup>265</sup>        | Dose-response | 2            | 1         | 0,8           | 1          | 0,5              | 1            | 0           | 1             | 7,3  | Moderate   |
| Calcium                    | Dong & Qin 2012 <sup>266</sup>          | High v low    | 1,25         | 1         | 0,4           | 1          | 0,5              | 0,5          | 0           | 0             | 4,65 | Low        |
| Total polyphenols          | Rienks et al (2018) <sup>267</sup>      | High v low    | 1            | 0         | 0             | 1          | 0                | 1            | 1           | 0             | 4    | Low        |
| Flavonoids                 | Rienks et al (2018) <sup>267</sup>      | Dose-response | 1            | 1         | 0,4           | 1          | 0,5              | 1            | 0           | 0             | 4,9  | Low        |
| Anthocyanins               | Guo 2016 <sup>243</sup>                 | Dose-response | 1,5          | 1         | 0             | 1          | 0                | 1            | 0           | 1             | 5,5  | Low        |
| Flavanols                  | Rienks et al (2018) <sup>267</sup>      | High v low    | 1            | 1         | 0             | 1          | 0                | 1            | 1           | 0             | 5    | Low        |
| Flavan-3-ols               | Rienks et al (2018) <sup>267</sup>      | Dose-response | 1            | 1         | 0             | 1          | 0                | 1            | 0           | 0             | 4    | Low        |
| Catechin                   | Rienks et al (2018) <sup>267</sup>      | High v low    | 1            | 1         | 0             | 1          | 0                | 1            | 0           | 0             | 4    | Low        |
| Proanthocyanids            | Rienks et al (2018) <sup>267</sup>      | High v low    | 1            | 1         | 0             | 1          | 0                | 1            | 0           | 0             | 4    | Low        |
| Flavanones                 | Rienks et al (2018) <sup>267</sup>      | High v low    | 1            | 1         | 0,2           | 1          | 0                | 1            | 0           | 0             | 4,2  | Low        |

Supplementary Table 5 continued...

| Exposure         | Reference                          | Comparison    | Risk of bias | Precision | Heterogeneity | Directness | Publication bias | Funding bias | Effect size | Dose-response | Sum | NutriGrade |
|------------------|------------------------------------|---------------|--------------|-----------|---------------|------------|------------------|--------------|-------------|---------------|-----|------------|
| Flavones         | Rienks et al (2018) <sup>267</sup> | Dose-response | 1            | 1         | 0             | 1          | 0                | 1            | 0           | 0             | 4   | Low        |
| Luteolin         | Rienks et al (2018) <sup>267</sup> | Dose-response | 1            | 0         | 0             | 1          | 0                | 1            | 0           | 0             | 3   | Very low   |
| Flavonoles       | Rienks et al (2018) <sup>267</sup> | Dose-response | 1            | 1         | 0,2           | 1          | 0,5              | 1            | 0           | 0             | 4,7 | Low        |
| Quercetin        | Rienks et al (2018) <sup>267</sup> | Dose-response | 1            | 1         | 0             | 1          | 0                | 1            | 0           | 0             | 4   | Low        |
| Kaempferol       | Rienks et al (2018) <sup>267</sup> | Dose-response | 1            | 1         | 0             | 1          | 0                | 1            | 0           | 0             | 4   | Low        |
| Myricetin        | Rienks et al (2018) <sup>267</sup> | High v low    | 1            | 1         | 0             | 1          | 0                | 1            | 0           | 0             | 4   | Low        |
| Isoflavones      | Rienks et al (2018) <sup>267</sup> | Dose-response | 1            | 1         | 0,4           | 1          | 0,5              | 1            | 0           | 0             | 4,9 | Low        |
| Daidzein         | Rienks et al (2018) <sup>267</sup> | Dose-response | 1            | 1         | 0             | 1          | 0                | 1            | 0           | 0             | 4   | Low        |
| Genistein        | Rienks et al (2018) <sup>267</sup> | Dose-response | 1            | 1         | 0             | 1          | 0                | 1            | 0           | 0             | 4   | Low        |
| Dihydrochalcones | Rienks et al (2018) <sup>267</sup> | Dose-response | 1            | 0         | 0             | 1          | 0                | 1            | 0           | 0             | 3   | Very low   |
| Phenolic acids   | Rienks et al (2018) <sup>267</sup> | Dose-response | 1            | 0         | 0             | 1          | 0                | 1            | 1           | 1             | 5   | Low        |
| Stilbenes        | Rienks et al (2018) <sup>267</sup> | Dose-response | 1            | 0         | 0             | 1          | 0                | 1            | 1           | 0             | 4   | Low        |
| Lignans          | Rienks et al (2018) <sup>267</sup> | Dose-response | 1            | 0         | 0             | 1          | 0                | 1            | 1           | 0             | 4   | Very low   |
| Others           | Rienks et al (2018) <sup>267</sup> | Dose-response | 1            | 0         | 0             | 1          | 0                | 1            | 0           | 0             | 3   | Very low   |
| Vitamin E        | Hamer & Chida 2007 <sup>268</sup>  | High v low    | 1            | 0         | 0             | 1          | 0                | 0,5          | 1           | 0             | 3,5 | Very low   |
| Vitamin C        | Hamer & Chida 2007 <sup>268</sup>  | High v low    | 1            | 0         | 0             | 1          | 0                | 0,5          | 1           | 0             | 3,5 | Very low   |
| Lycopene         | Hamer & Chida 2007 <sup>268</sup>  | High v low    | 1            | 0         | 0             | 1          | 0                | 0,5          | 1           | 0             | 3,5 | Very low   |
| Caffeine         | Ding 2014 <sup>250</sup>           | Dose-response | 1            | 1         | 0,4           | 1          | 0                | 1            | 0           | 1             | 5,4 | Low        |

\* Modifications of original NutriGrade-scoring system: Precision: >5000 cases; Study quality Newcastle Ottawa Scale (NOS): >=8 (2 P); >=7-<8 (1.5P), >=6-<7(1 P)

**Supplementary Figure 1:** Flow chart of the selection of published meta-analyses

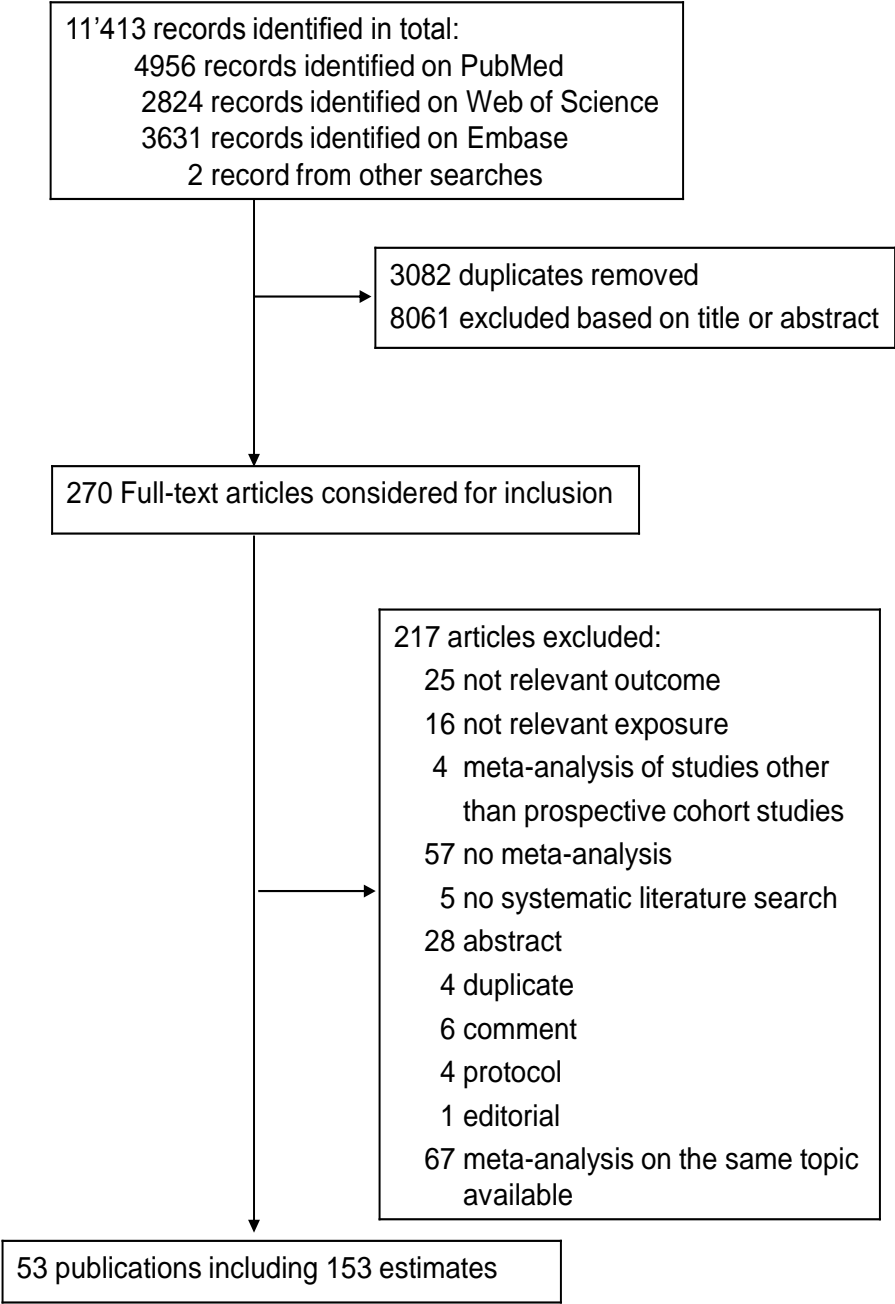

**Supplementary Figure 2:** Funnel plots for the association between A) healthy dietary patterns, B) unhealthy dietary patterns, C) healthy eating index (HEI), D) the alternative healthy eating index (AHEI), E) dietary approaches to stop hypertension (DASH), F) the mediterranean diet, G) vegetarian diet, H) low carbohydrate diet, I) breakfast skipping, J) glycemic index, K) glycemic load and incidence of type 2 diabetes. For each meta-analysis the study-specific estimates were plotted in the funnel.

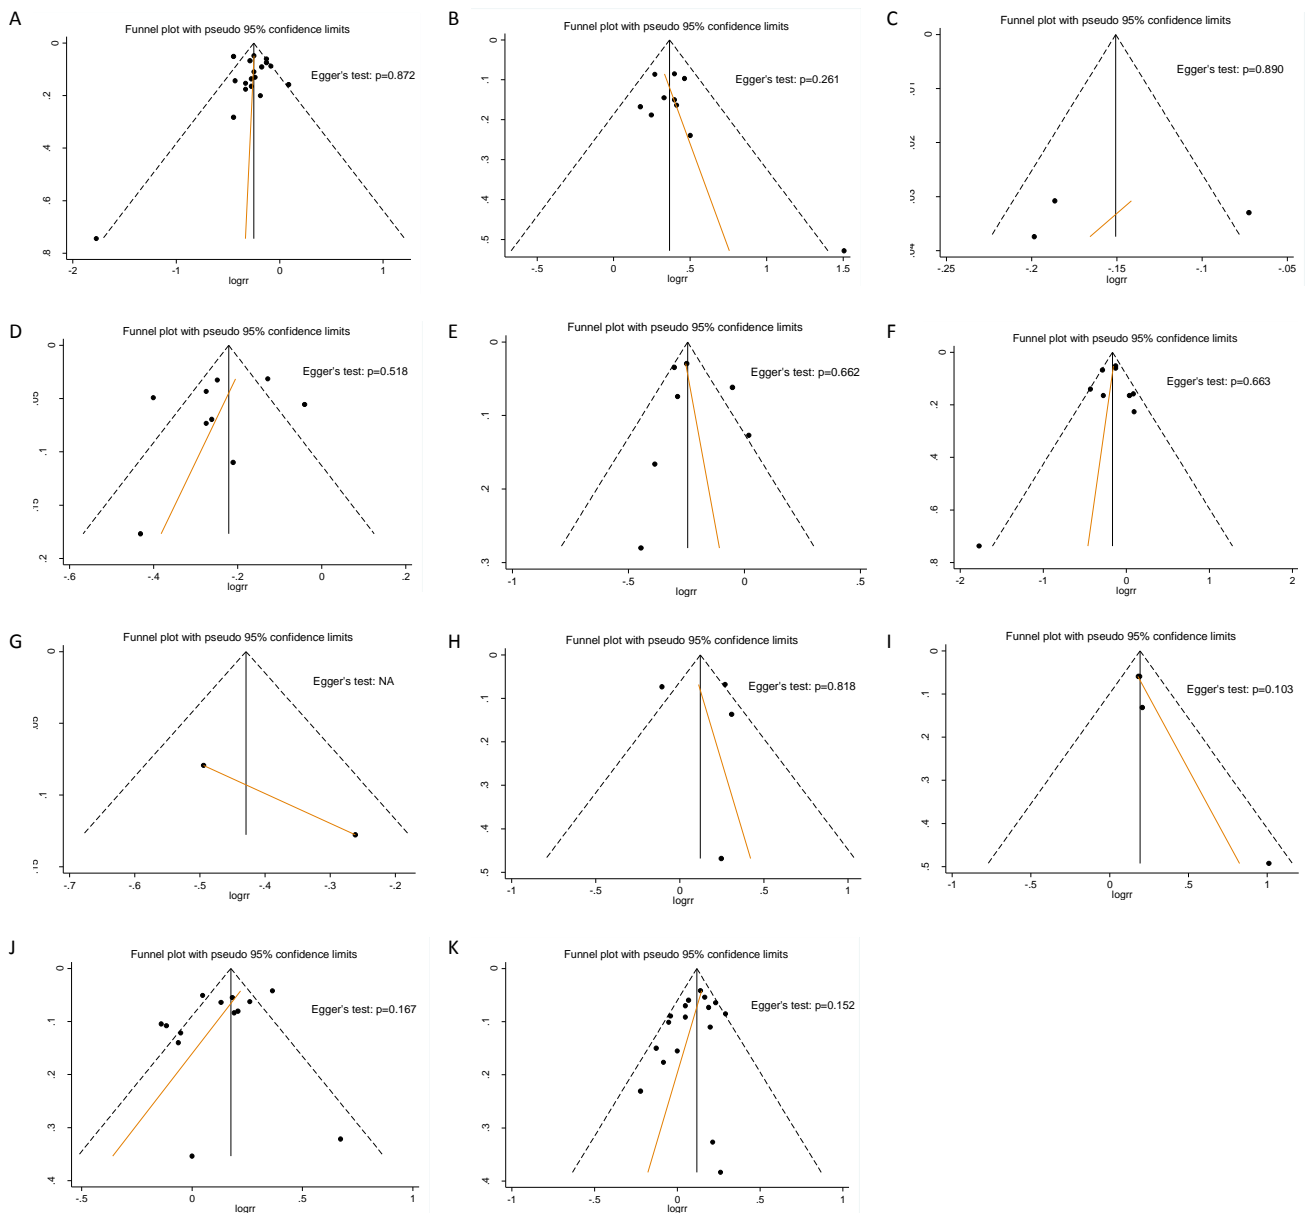



**Supplementary Figure 3:** Funnel plots for the association between A) total dairy (dose-response), B) low-fat dairy products (dose-response), C) high-fat dairy products (dose-response), D) milk (dose-response), E) low-fat milk (dose-response), F) high-fat milk (dose-response), G) yogurt (dose-response), H) cheese (dose-response), I) cottage cheese (high vs. low), J) fermented dairy products (high vs. low), K) cream (dose-response), L) ice cream (dose-response) and M) sherbet (dose-response) and incidence of type 2 diabetes. For each meta-analysis the study-specific estimates were plotted in the funnel.

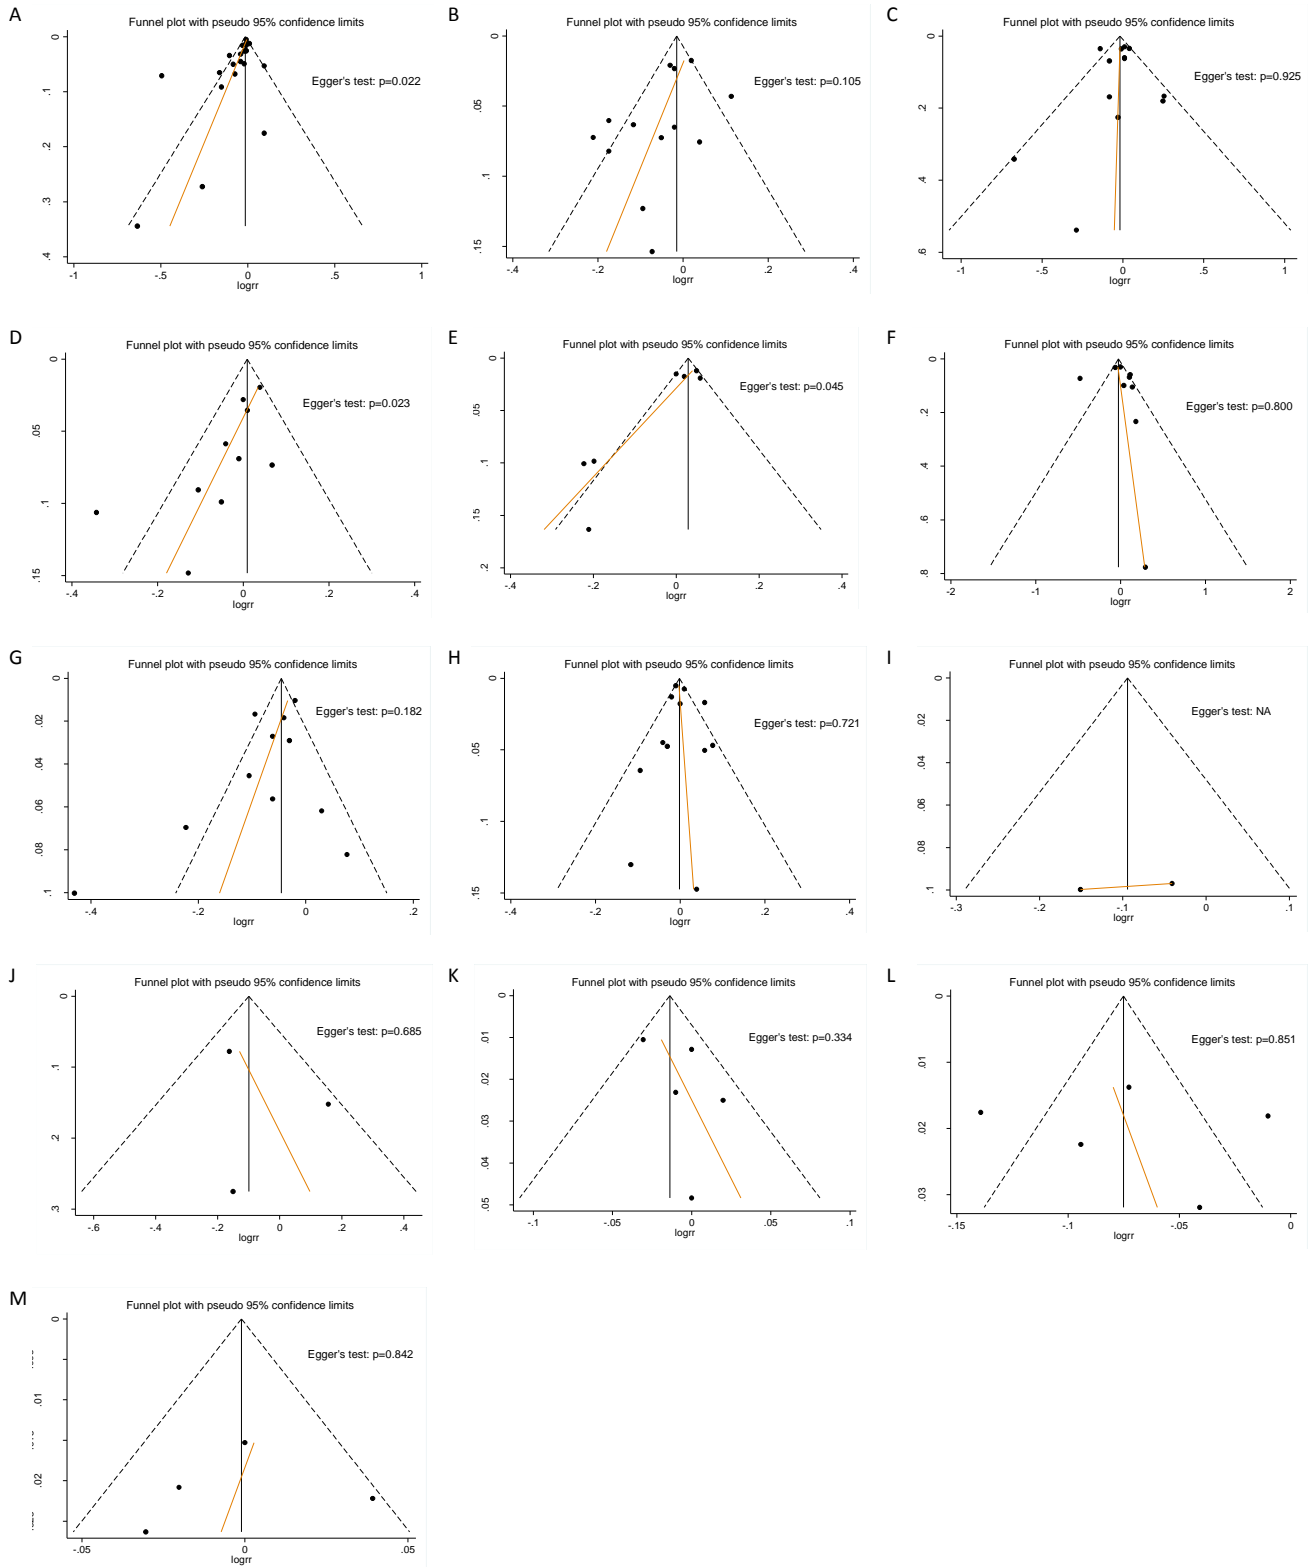

**Supplementary Figure 4:** Funnel plots for the association between A) eggs (dose-response) and incidence of type 2 diabetes. For each meta-analysis the study-specific estimates were plotted in the funnel.

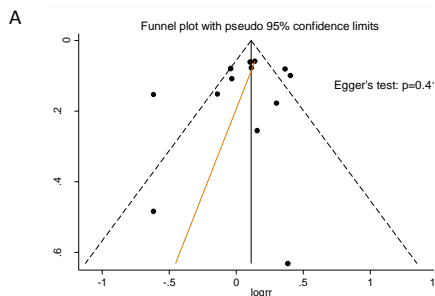

**Supplementary Figure 5:** Funnel plots for the association between A) total meat (dose-response), B) red meat (dose-response), C) processed meat (dose-response), D) poultry (dose-response), E) processed red meat (dose-response), F) unprocessed red meat (dose-response) and incidence of type 2 diabetes. For each meta-analysis the study-specific estimates were plotted in the funnel.

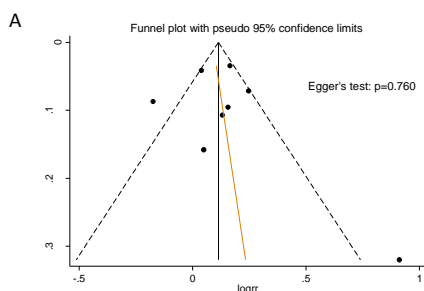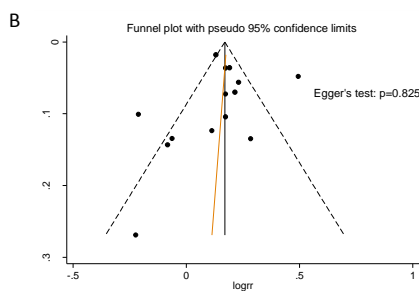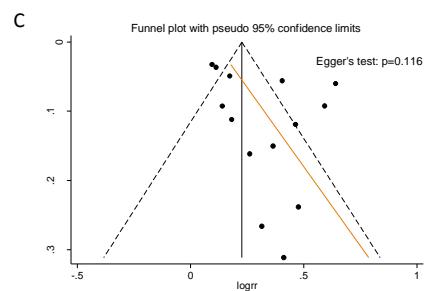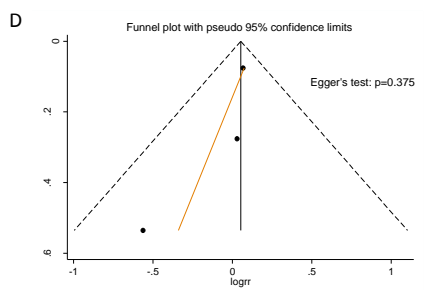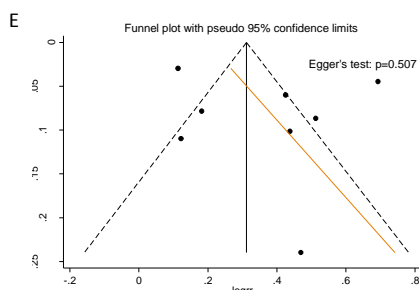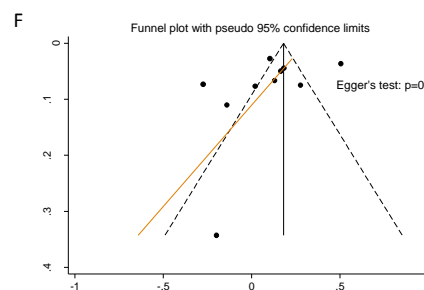

**Supplementary Figure 6:** Funnel plots for the association between A) total fish/seafood (dose-response), B) lean fish (high vs. low), C) oily fish (high vs. low), D) shellfish (high vs. low) and E) fish (high vs. low) and incidence of type 2 diabetes. For each meta-analysis the study-specific estimates were plotted in the funnel.

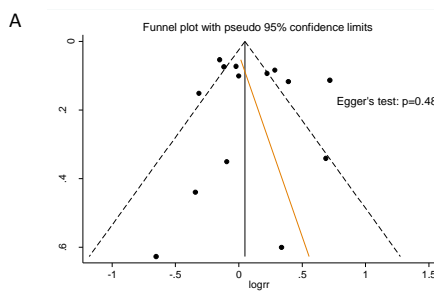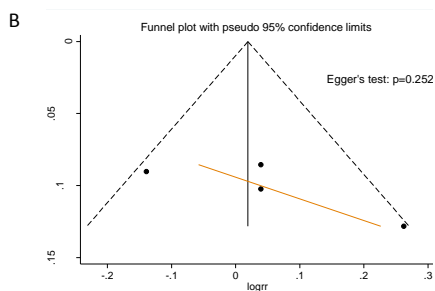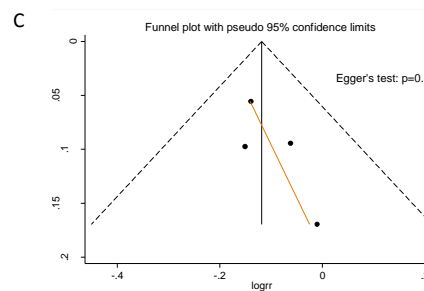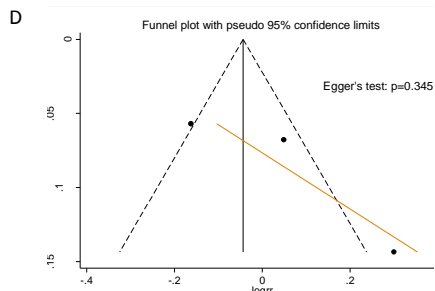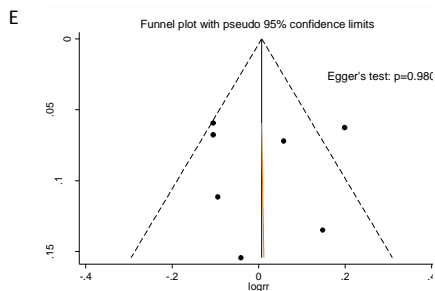

**Supplementary Figure 7:** Funnel plots for the association between A) olive oil (dose-response) and B) butter (dose-response) and incidence of type 2 diabetes. For each meta-analysis the study-specific estimates were plotted in the funnel.

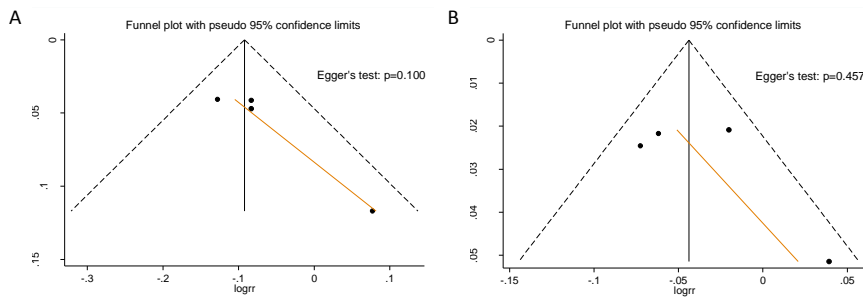

**Supplementary Figure 8:** Funnel plots for the association between A) total potatoes (dose-response), B) boiled/baked/mashed potatoes (dose-response), C) french fries (dose-response) and incidence of type 2 diabetes. For each meta-analysis the study-specific estimates were plotted in the funnel.

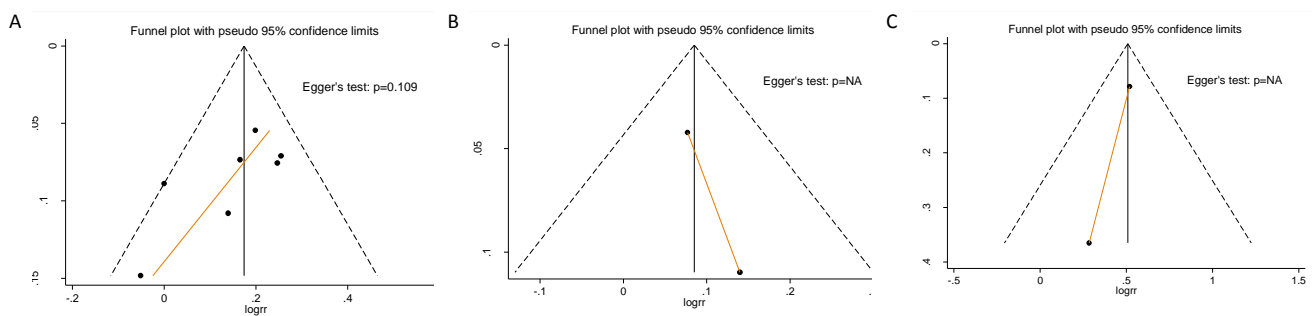

**Supplementary Figure 9:** Funnel plots for the association between A) total grains (dose-response), B) whole grain (dose-response), C) refined grain (dose-response), D) rice (high vs. low), E) soy products and incidence of type 2 diabetes. For each meta-analysis the study-specific estimates were plotted in the funnel.

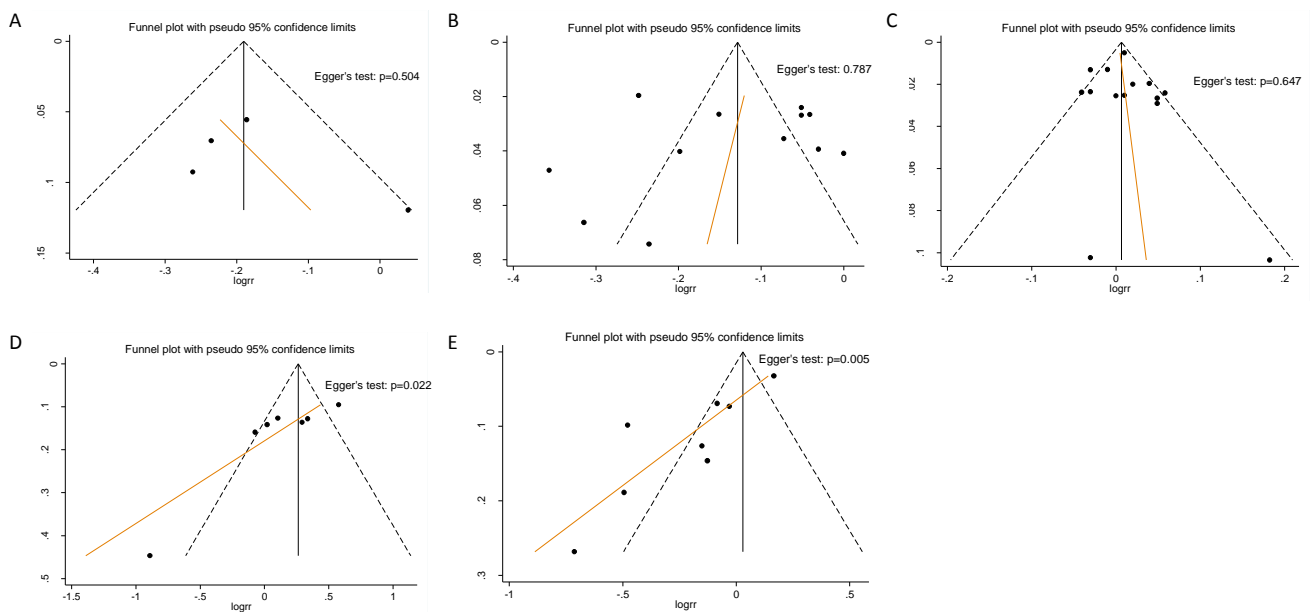

**Supplementary Figure 10:** Funnel plots for the association between A) legumes (dose-response), B) nuts (dose-response) and incidence of type 2 diabetes. For each meta-analysis the study-specific estimates were plotted in the funnel.

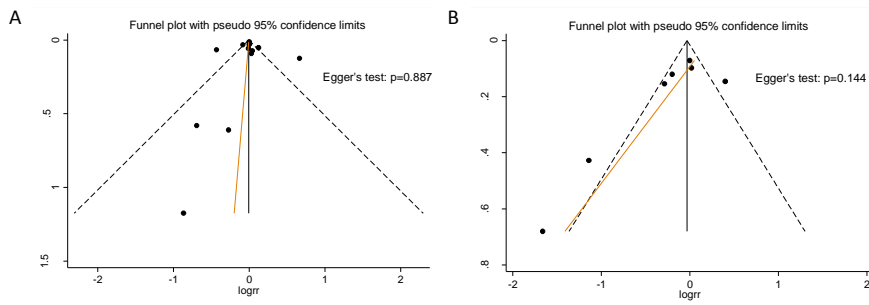

**Supplementary Figure 11:** Funnel plots for the association between A) fruits and vegetables (dose-response), B) fruit total (dose-response), C) citrus fruits (high vs. low), D) apples and pears (dose-response), E) vegetables total (dose-response), F) cruciferous vegetables (dose-response), G) green leafy vegetables (dose-response) and H) yellow vegetables (high vs. low) and incidence of type 2 diabetes. For each meta-analysis the study-specific estimates were plotted in the funnel.

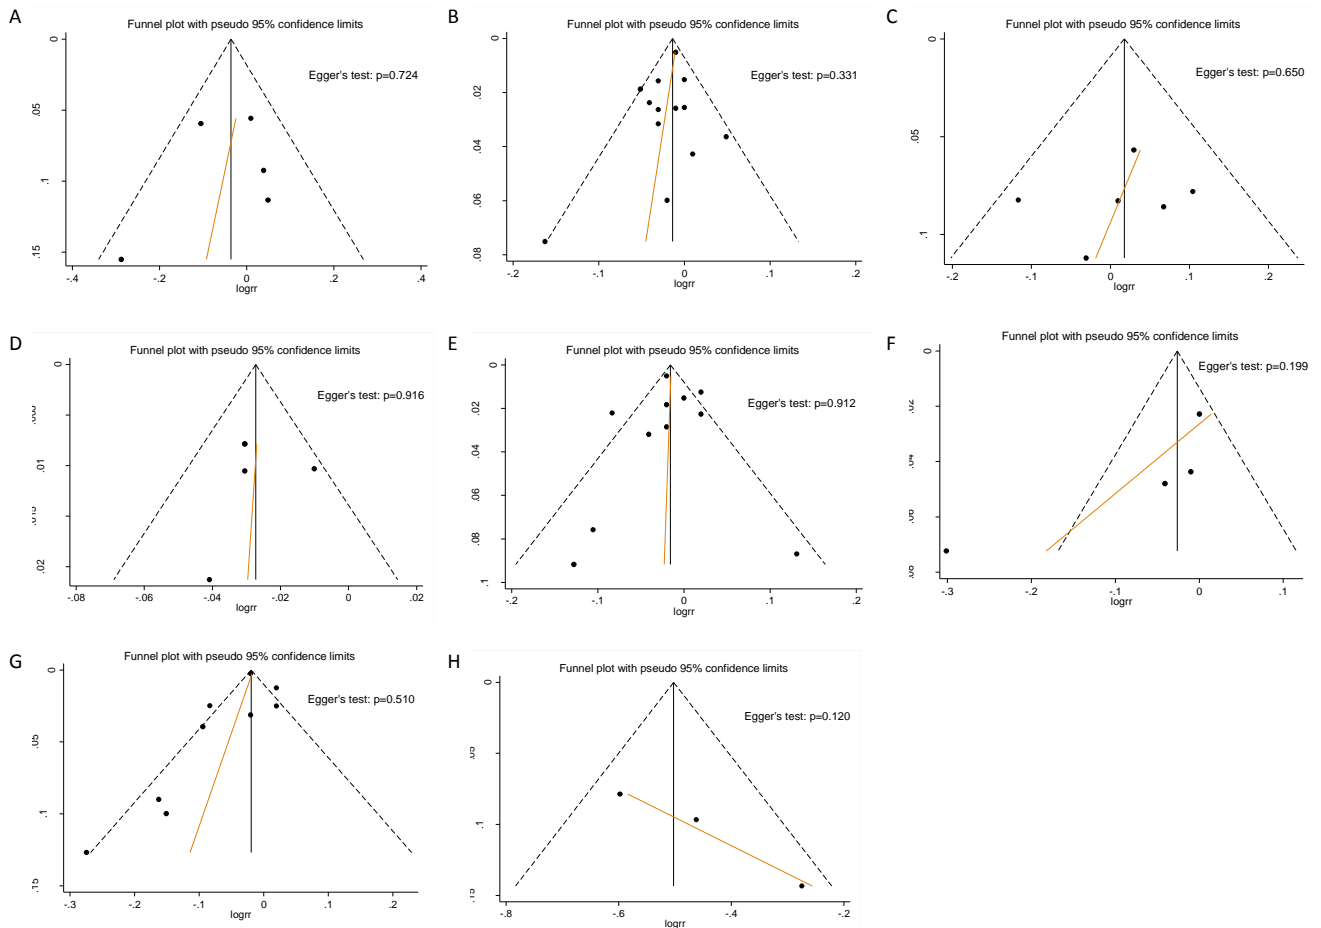

**Supplementary Figure 12:** Funnel plots for the association between A) total coffee (dose-response), B) sugar sweetened beverages (dose-response), C) artificially sweetened beverages (dose-response), D) total fruit juice (dose-response), E) sugar-sweetened fruit juice (high vs. low), F) 100% fruit juice (high vs. low) and G) fruit juice, not specified (high vs. low) and incidence of type 2 diabetes. For each meta-analysis the study-specific estimates were plotted in the funnel.

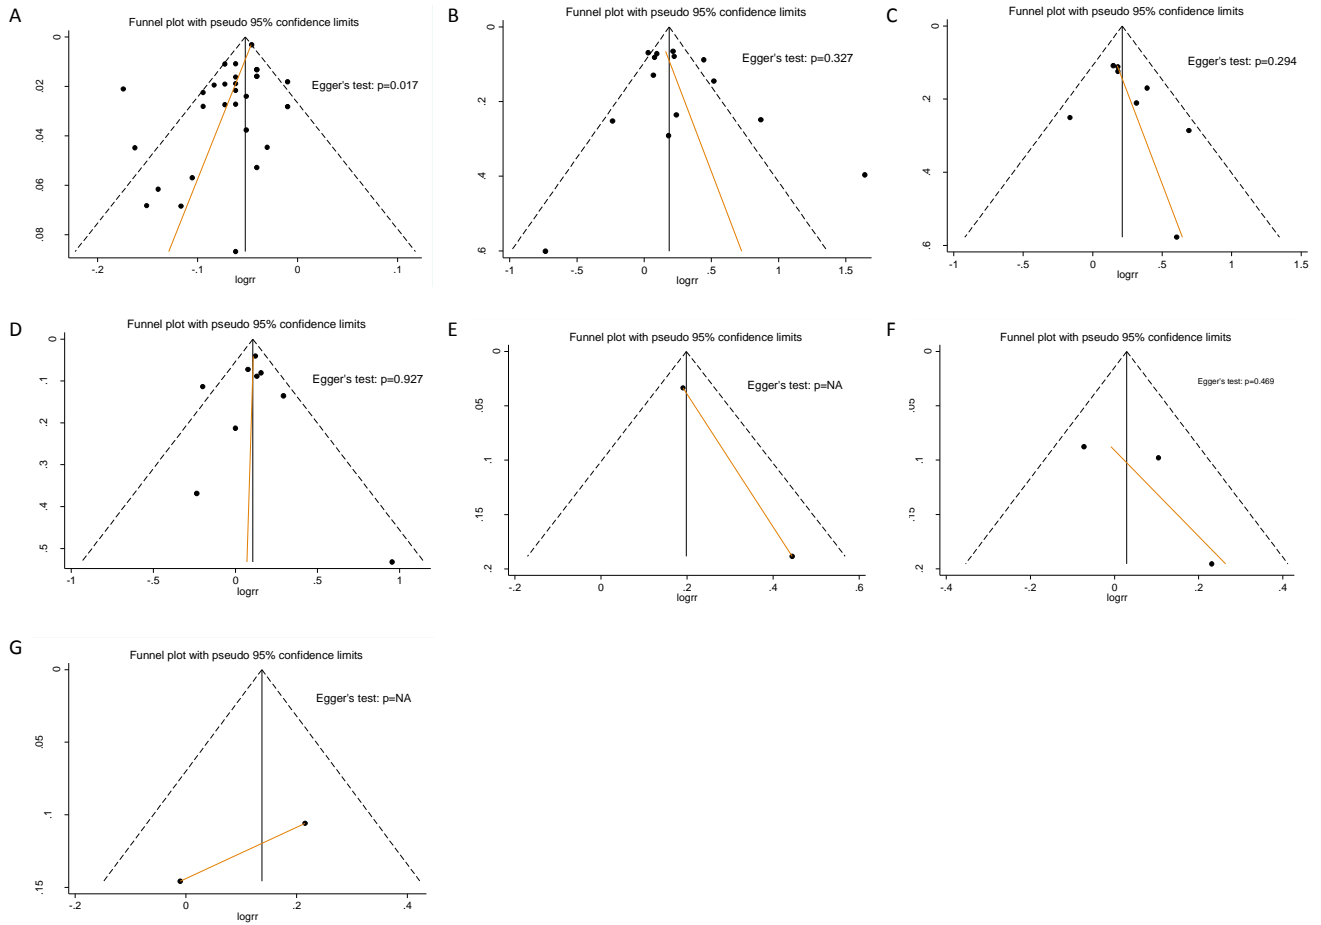

**Supplementary Figure 13:** Funnel plots for the association between A) total alcohol (light), B) total alcohol (moderate), C) total alcohol (heavy), D) wine (light), E) wine (moderate), F) wine (heavy), G) beer (light), H) beer (moderate), I) beer (heavy), J) spirits (light), K) spirits (moderate), L) spirits (heavy) and incidence of T2D. For each meta-analysis the study-specific estimates were plotted in the funnel.

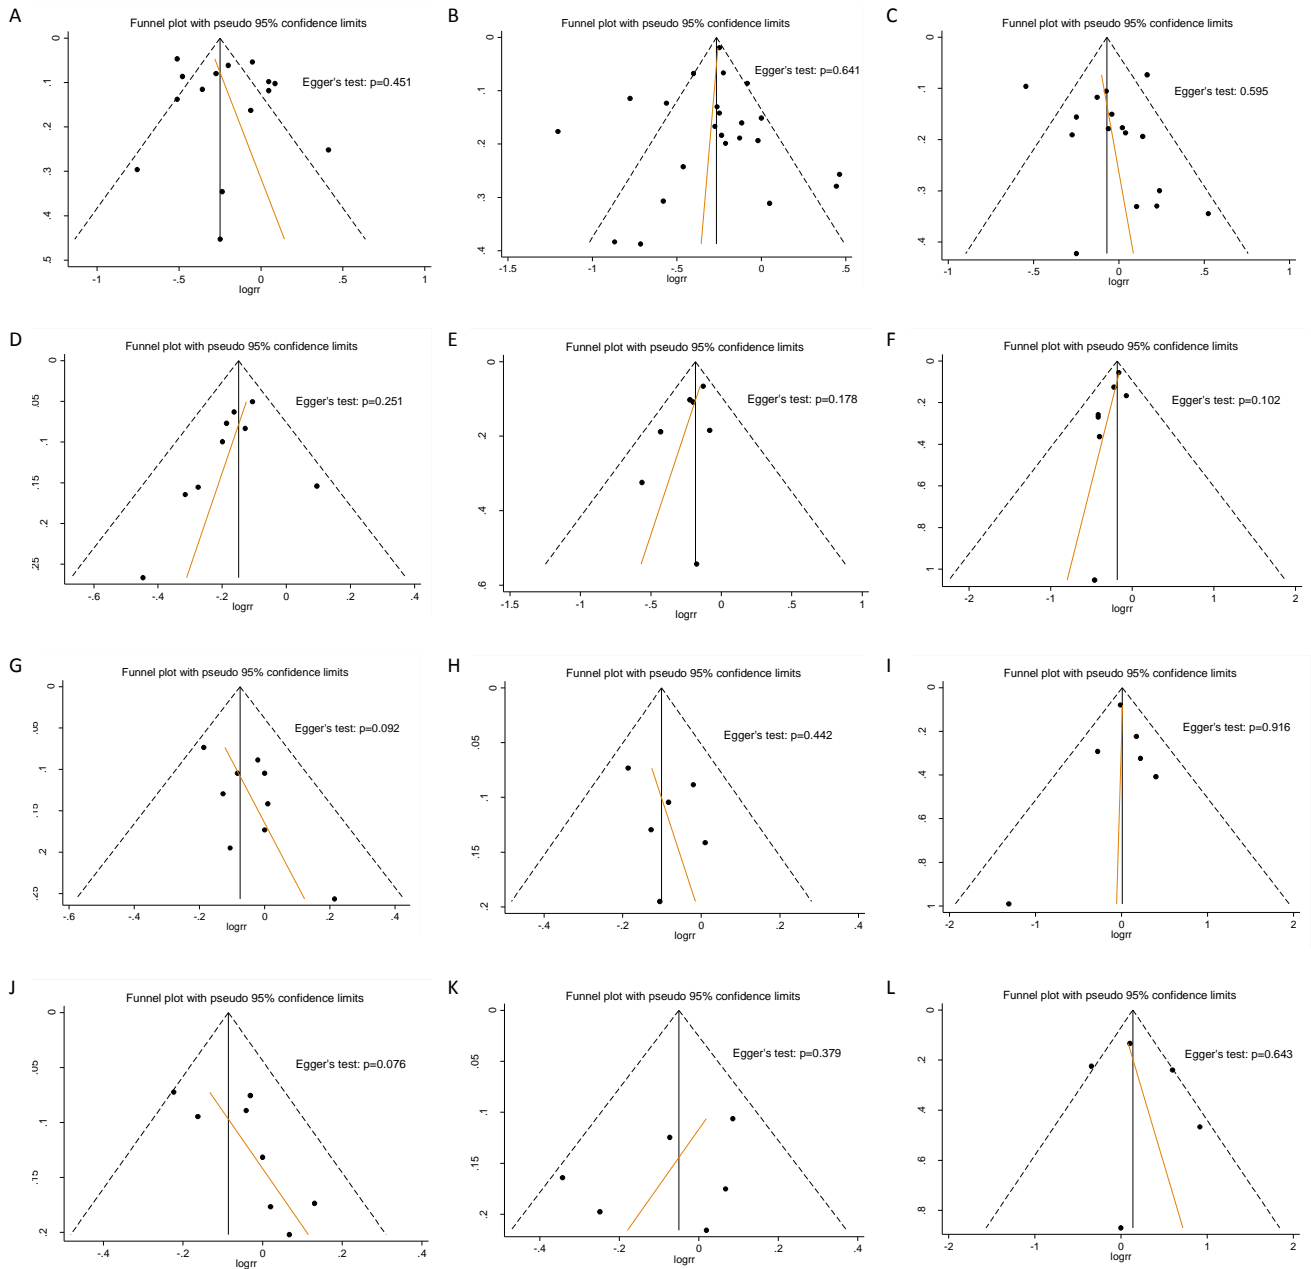

**Supplementary Figure 14:** Funnel plots for the association between A) total protein (dose-response), B) animal protein (dose-response), C) plant protein (dose-response) and incidence of type 2 diabetes. For each meta-analysis the study-specific estimates were plotted in the funnel.

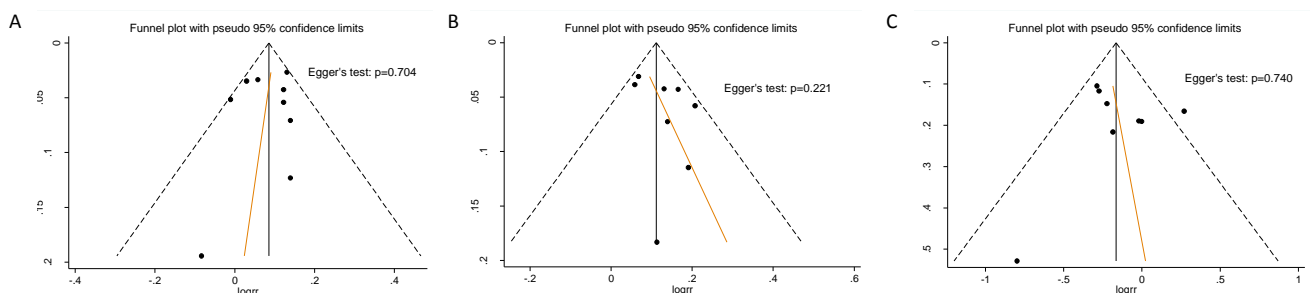

**Supplementary Figure 15:** Funnel plots for the association between A) total fat (high vs. low), B) animal fat (high vs. low), C) vegetable fat ((high vs. low), D) MUFAs (high vs. low), E) EPA & DHA (dose-response), F) ALA (high vs. low), G) total omega-6 fatty acids (high vs. low), H) PUFAs (high vs. low), I) saturated fatty acids (high vs. low), J) trans-fatty acids (high vs. low), K) ruminant trans-fatty acids (high vs. low), and L) cholesterol (dose-response) and incidence of type 2 diabetes. For each meta-analysis the study-specific estimates were plotted in the funnel.

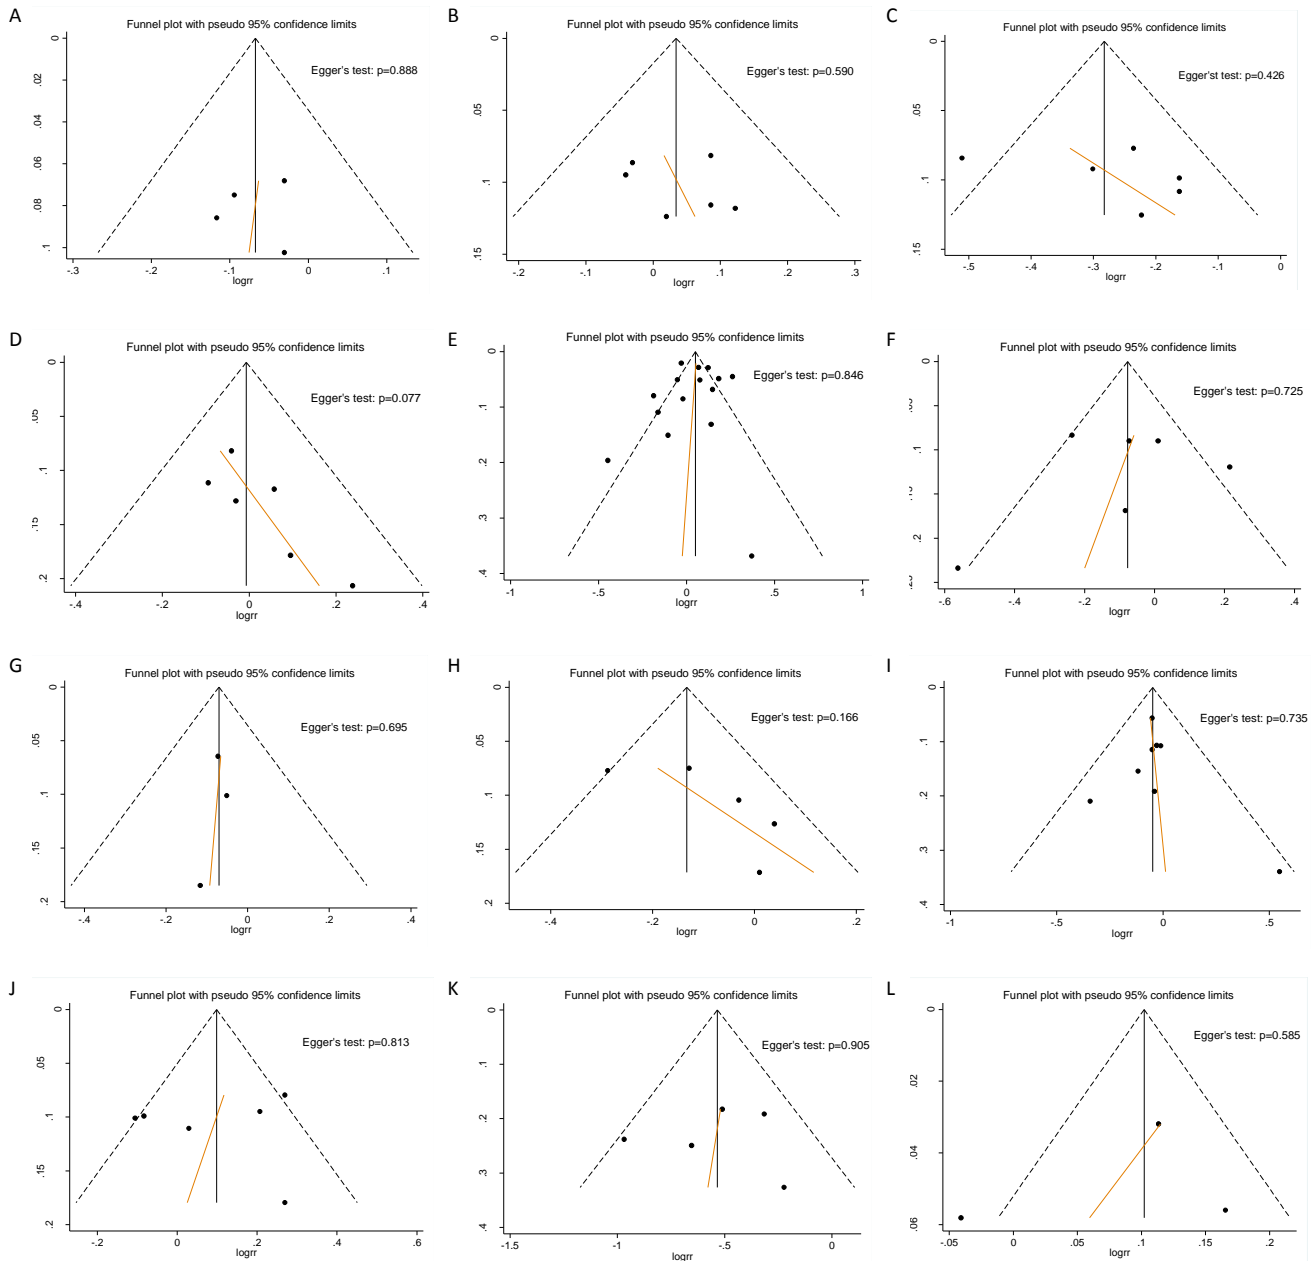

**Supplementary Figure 16:** Funnel plots for the association between A) total carbohydrates (high vs. low), B) total sugars (dose-response), C) fructose (dose-response), D) glucose (high vs. low), E) lactose (high vs. low), F) maltose (high vs. low), G) sucrose (dose-response) and incidence of type 2 diabetes. For each meta-analysis the study-specific estimates were plotted in the funnel.

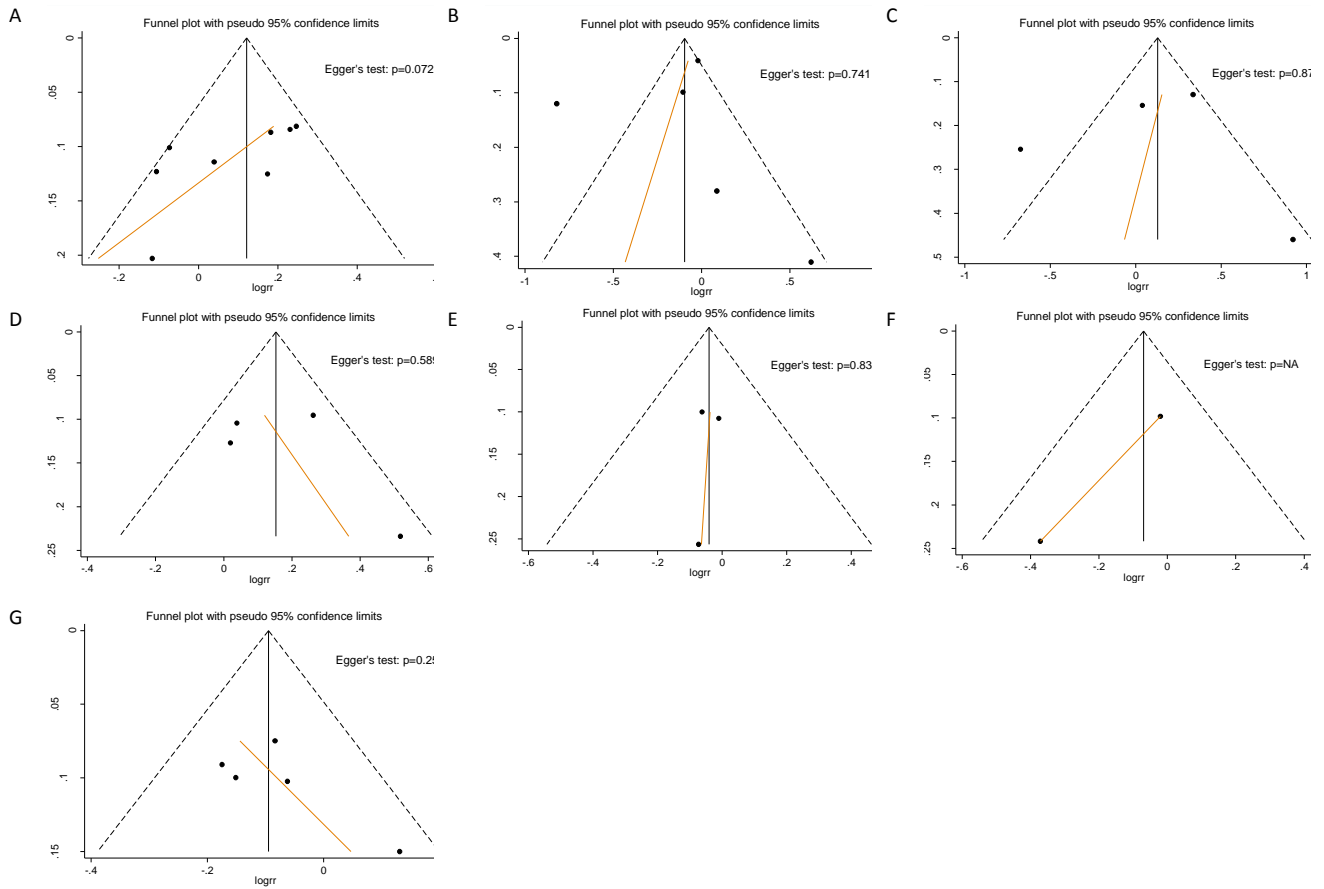

**Supplementary Figure 17:** Funnel plots for the association between A) total fibre (dose-response), B) cereal fibre (dose-response), C) fruit fibre (dose-response), D) vegetable fibre (dose-response), E) soluble fibre (dose-response), F) insoluble fibre (dose-response) and incidence of type 2 diabetes. For each meta-analysis the study-specific estimates were plotted in the funnel.

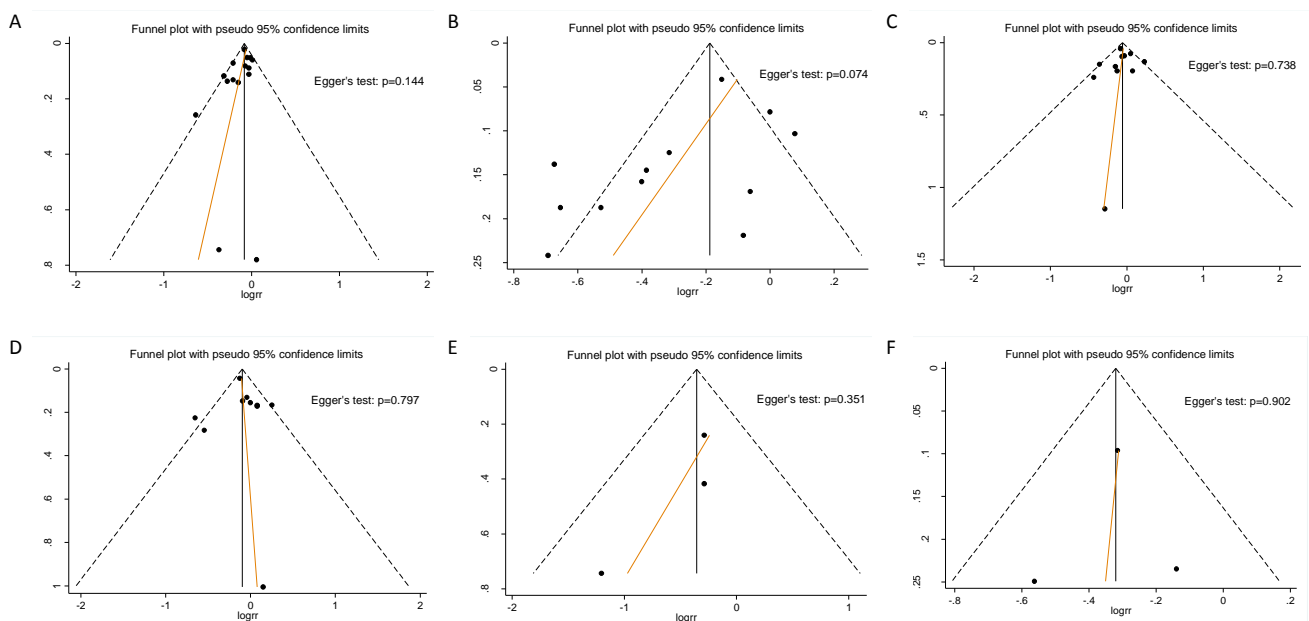



**Supplementary Figure 18:** Funnel plots for the association between A) vitamin D (high vs. low), B) total iron (dose-response), C) heme iron (dose-response), D) magnesium (dose-response), F) vitamin E (high vs. low), G) vitamin C (high vs. low) and H) lycopene (high vs. low) and incidence of type 2 diabetes. For each meta-analysis the study-specific estimates were plotted in the funnel.

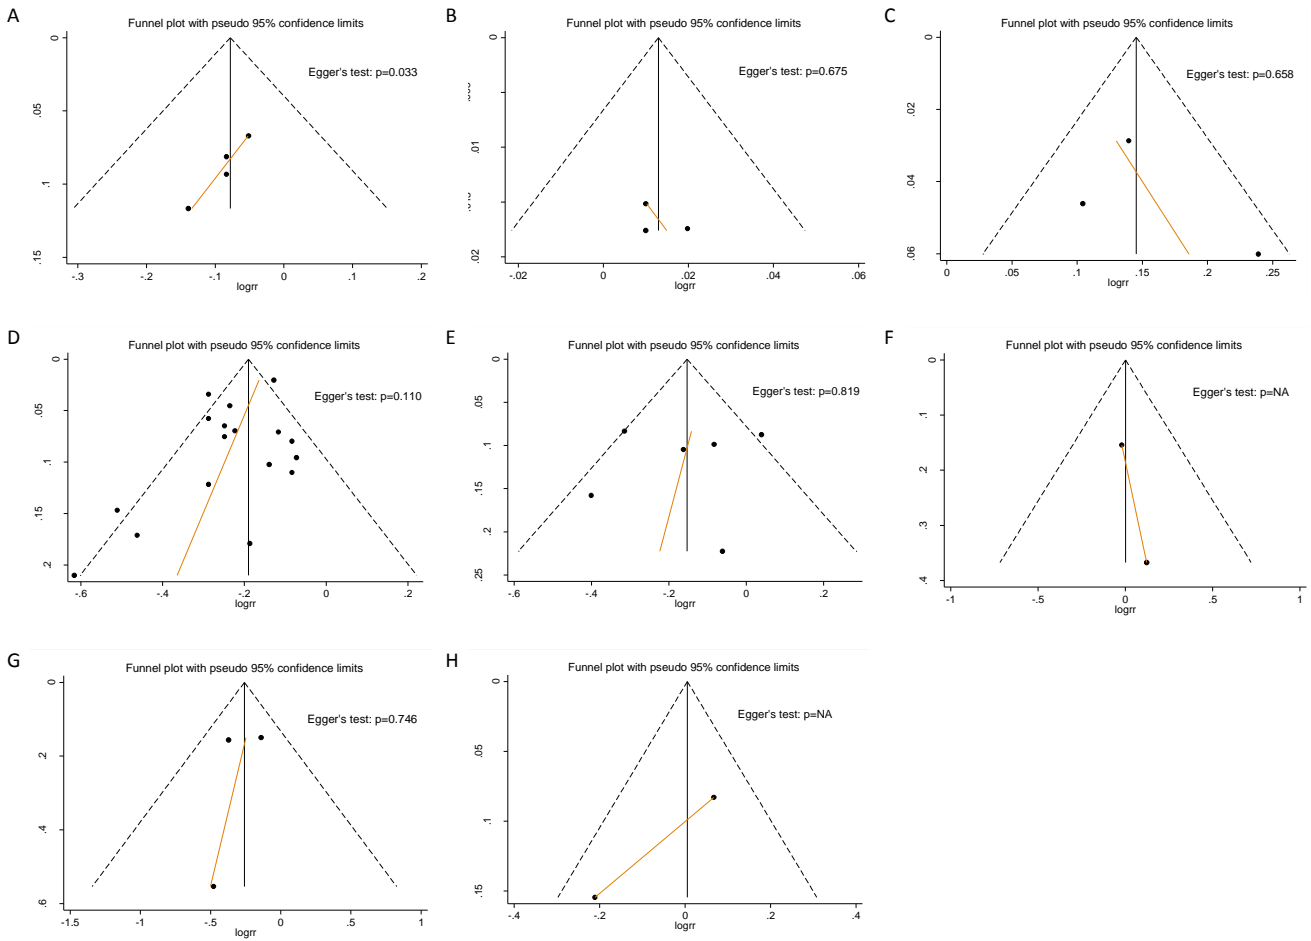

**Supplementary Figure 19:** Funnel plots for the association between A) total polyphenols (high vs low), B) flavanols (high vs low), C) catechin (high vs low), D) proanthocyanids (high vs low), E) flavanones (high vs low), F) Myricetin (high vs low) and incidence of T2D. For each meta-analysis the study-specific estimates were plotted in the funnel.

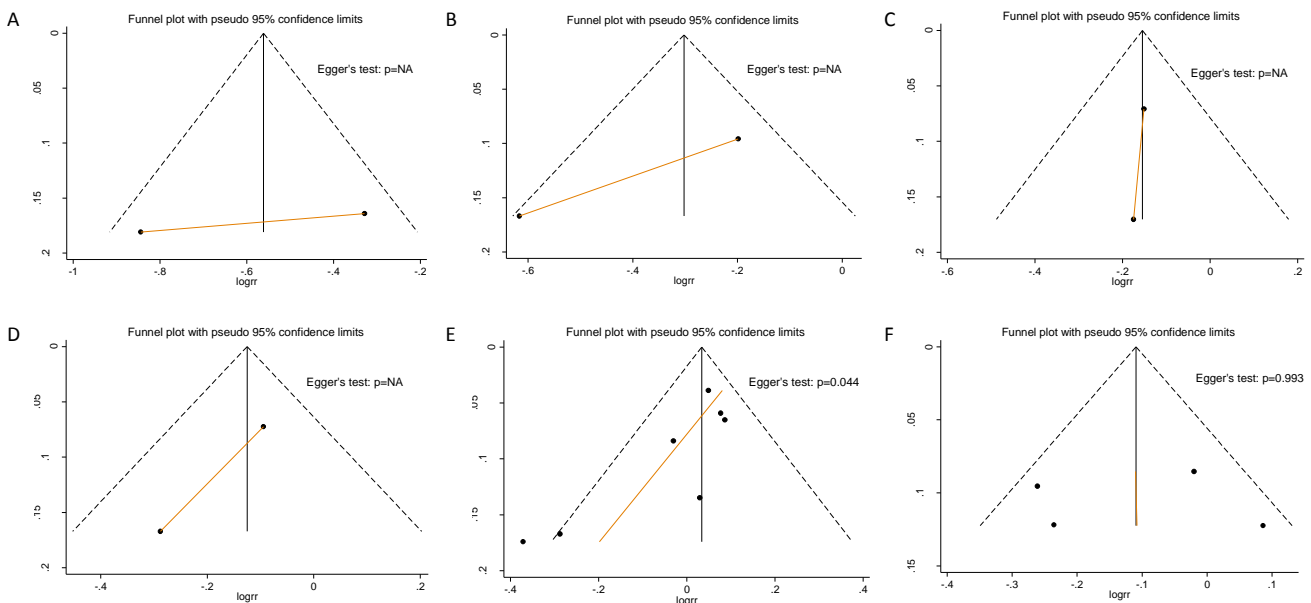

## References

1. Ricci E, Cipriani S, Chiaffarino F, et al. Effects of soy isoflavones and genistein on glucose metabolism in perimenopausal and postmenopausal non-Asian women: a meta-analysis of randomized controlled trials. *Menopause-the Journal of the North American Menopause Society* 2010;17(5) doi: <Go to ISI>://WOS:000281614700031
2. Akinkuolie AO, Ngwa JS, Meigs JB, et al. Omega-3 polyunsaturated fatty acid and insulin sensitivity: A meta-analysis of randomized controlled trials. *Clinical Nutrition* 2011;30(6) doi: <Go to ISI>://WOS:000298939400002
3. Kastorini CM, Milionis HJ, Esposito K, et al. The Effect of Mediterranean Diet on Metabolic Syndrome and its Components A Meta-Analysis of 50 Studies and 534,906 Individuals. *Journal of the American College of Cardiology* 2011;57(11) doi: <Go to ISI>://WOS:000288160000010
4. Schwingshackl L, Strasser B, Hoffmann G. Effects of Monounsaturated Fatty Acids on Cardiovascular Risk Factors: A Systematic Review and Meta-Analysis. *Annals of Nutrition and Metabolism* 2011;59(2-4) doi: <Go to ISI>://WOS:000299078800015
5. Jayawardena R, Ranasinghe P, Galappatthy P, et al. Effects of zinc supplementation on diabetes mellitus: a systematic review and meta-analysis. *Diabetol Metab Syndr* 2012;4(1) doi: 10.1186/1758-5996-4-13.
6. Shirani F, Salehi-Abargouei A, Azadbakht L. Effects of Dietary Approaches to Stop Hypertension (DASH) diet on some risk for developing type 2 diabetes: A systematic review and meta-analysis on controlled clinical trials. *Nutrition* 2013;29(7-8) doi: <Go to ISI>://WOS:000321029700003
7. Dibaba DT, Xun P, Fly AD, et al. Dietary magnesium intake and risk of metabolic syndrome: a meta-analysis. *Diabetic Medicine* 2014;31(11) doi: <Go to ISI>://WOS:000344010200005
8. Ju SY, Choi WS, Ock SM, et al. Dietary Magnesium Intake and Metabolic Syndrome in the Adult Population: Dose-Response Meta-Analysis and Meta-Regression. *Nutrients* 2014;6(12) doi: <Go to ISI>://WOS:000346796100039
9. Mejia SB, Kendall CWC, Viguioliouk E, et al. Effect of tree nuts on metabolic syndrome criteria: a systematic review and meta-analysis of randomised controlled trials. *Bmj Open* 2014;4(7) doi: <Go to ISI>://WOS:000339720900012
10. Tabatabaei-Malazy O, Nikfar S, Larijani B, et al. Influence of ascorbic acid supplementation on type 2 diabetes mellitus in observational and randomized controlled trials; a systematic review with meta-analysis. *J Pharm Pharm Sci* 2014;17(4)
11. Te Morenga LA, Howatson AJ, Jones RM, et al. Dietary sugars and cardiometabolic risk: systematic review and meta-analyses of randomized controlled trials of the effects on blood pressure and lipids. *Am J Clin Nutr* 2014;100(1) doi: 10.3945/ajcn.113.081521. Epub 2014 May 7.
12. Torris C, Molin M, Smastuen MC. Fish consumption and its possible preventive role on the development and prevalence of metabolic syndrome - a systematic review. *Diabetology & Metabolic Syndrome* 2014;6 doi: <Go to ISI>://WOS:000344554700001
13. Siervo M, Lara J, Chowdhury S, et al. Effects of the Dietary Approach to Stop Hypertension (DASH) diet on cardiovascular risk factors: a systematic review and meta-analysis. *British Journal of Nutrition* 2015;113(1) doi: <Go to ISI>://WOS:000347105000001
14. Bloomfield HE, Koeller E, Greer N, et al. Effects on Health Outcomes of a Mediterranean Diet With No Restriction on Fat Intake A Systematic Review and Meta-analysis. *Annals of Internal Medicine* 2016;165(7) doi: <Go to ISI>://WOS:000384771300007
15. Li B, Zhang G, Tan M, et al. Consumption of whole grains in relation to mortality from all causes, cardiovascular disease, and diabetes: Dose-response meta-analysis of prospective cohort studies. *Medicine (Baltimore)* 2016;95(33) doi: 10.1097/MD.0000000000004229.
16. Shang F, Li X, Jiang X. Coffee consumption and risk of the metabolic syndrome: A meta-analysis. *Diabetes & Metabolism* 2016;42(2) doi: <Go to ISI>://WOS:000375890500003
17. Simental-Mendia LE, Sahebkar A, Rodriguez-Moran M, et al. A systematic review and meta-analysis of randomized controlled trials on the effects of magnesium supplementation on insulin

- sensitivity and glucose control. *Pharmacol Res* 2016;111 doi: 10.1016/j.phrs.2016.06.019. Epub 2016 Jun 18.
18. Huang M, Li J, Ha MA, et al. A systematic review on the relations between pasta consumption and cardio-metabolic risk factors. *Nutrition Metabolism and Cardiovascular Diseases* 2017;27(11) doi: <Go to ISI>://WOS:000414543100001
  19. Micha R, Penalvo JL, Cudhea F, et al. Association Between Dietary Factors and Mortality From Heart Disease, Stroke, and Type 2 Diabetes in the United States. *Jama-Journal of the American Medical Association* 2017;317(9) doi: <Go to ISI>://WOS:000395541500011
  20. Murray M, Dordevic AL, Bonham MP, et al. Do marine algal polyphenols have antidiabetic, antihyperlipidemic or anti-inflammatory effects in humans? A systematic review. *Crit Rev Food Sci Nutr* 2017 doi: 10.1080/10408398.2017.1301876.
  21. Richard C, Cristall L, Fleming E, et al. Impact of Egg Consumption on Cardiovascular Risk Factors in Individuals with Type 2 Diabetes and at Risk for Developing Diabetes: A Systematic Review of Randomized Nutritional Intervention Studies. *Canadian Journal of Diabetes* 2017;41(4) doi: <Go to ISI>://WOS:000406018000018
  22. Siscovick DS, Barringer TA, Fretts AM, et al. Omega-3 Polyunsaturated Fatty Acid (Fish Oil) Supplementation and the Prevention of Clinical Cardiovascular Disease: A Science Advisory From the American Heart Association. *Circulation* 2017;135(15) doi: <Go to ISI>://WOS:000398851900001
  23. Chen JP, Chen GC, Wang XP, et al. Dietary Fiber and Metabolic Syndrome: A Meta-Analysis and Review of Related Mechanisms. *Nutrients* 2018;10(1) doi: <Go to ISI>://WOS:000424088000024
  24. Ismail SR, Maarof SK, Siedar Ali S, et al. Systematic review of palm oil consumption and the risk of cardiovascular disease. *Plos One* 2018;13(2) doi: 10.1371/journal.pone.0193533. eCollection 2018.
  25. Owen CG, Martin RM, Whincup PH, et al. Does breastfeeding influence risk of type 2 diabetes in later life? A quantitative analysis of published evidence. *Am J Clin Nutr* 2006;84(5):1043-54.
  26. Javed F, Al-Hezaimi K, Warnakulasuriya S. Areca-nut chewing habit is a significant risk factor for metabolic syndrome: A systematic review. *Journal of Nutrition Health & Aging* 2012;16(5) doi: <Go to ISI>://WOS:000305239200006
  27. Afzal S, Bojesen SE, Nordestgaard BG. Low 25-hydroxyvitamin D and risk of type 2 diabetes: a prospective cohort study and metaanalysis. *Clin Chem* 2013;59(2) doi: 10.1373/clinchem.2012.193003. Epub 2012 Dec 11.
  28. Schellenberg ES, Dryden DM, Vandermeer B, et al. Lifestyle Interventions for Patients With and at Risk for Type 2 Diabetes A Systematic Review and Meta-analysis. *Annals of Internal Medicine* 2013;159(8) doi: <Go to ISI>://WOS:000326751200017
  29. Jager S, Jacobs S, Kroger J, et al. Breast-feeding and maternal risk of type 2 diabetes: a prospective study and meta-analysis. *Diabetologia* 2014;57(7) doi: <Go to ISI>://WOS:000337498700013
  30. Orban E, Schwab S, Thorand B, et al. Association of iron indices and type 2 diabetes: a meta-analysis of observational studies. *Diabetes-Metabolism Research and Reviews* 2014;30(5) doi: <Go to ISI>://WOS:000339416900005
  31. Balk EM, Earley A, Raman G, et al. Combined Diet and Physical Activity Promotion Programs to Prevent Type 2 Diabetes Among Persons at Increased Risk: A Systematic Review for the Community Preventive Services Task Force. *Annals of Internal Medicine* 2015;163(6) doi: <Go to ISI>://WOS:000361365900018
  32. Stevens JW, Khunti K, Harvey R, et al. Preventing the progression to Type 2 diabetes mellitus in adults at high risk: A systematic review and network meta-analysis of lifestyle, pharmacological and surgical interventions. *Diabetes Research and Clinical Practice* 2015;107(3) doi: <Go to ISI>://WOS:000349959600005
  33. Li XH, Yu FF, Zhou YH, et al. Association between alcohol consumption and the risk of incident type 2 diabetes: a systematic review and dose-response meta-analysis. *American Journal of Clinical Nutrition* 2016;103(3) doi: <Go to ISI>://WOS:000371650200019

34. Sing CW, Cheng VK, Ho DK, et al. Serum calcium and incident diabetes: an observational study and meta-analysis. *Osteoporos Int* 2016;27(5) doi: 10.1007/s00198-015-3444-z. Epub 2015 Dec 11.
35. Wang XL, Yang TB, Wei J, et al. Association between serum selenium level and type 2 diabetes mellitus: a non-linear dose-response meta-analysis of observational studies. *Nutrition Journal* 2016;15 doi: <Go to ISI>://WOS:000375656500002
36. Ekmekcioglu C, Haluza D, Kundi M. 25-Hydroxyvitamin D Status and Risk for Colorectal Cancer and Type 2 Diabetes Mellitus: A Systematic Review and Meta-Analysis of Epidemiological Studies. *International Journal of Environmental Research and Public Health* 2017;14(2) doi: <Go to ISI>://WOS:000395467900019
37. Hemmingsen B, Gimenez-Perez G, Mauricio D, et al. Diet, physical activity or both for prevention or delay of type 2 diabetes mellitus and its associated complications in people at increased risk of developing type 2 diabetes mellitus. *Cochrane Database Syst Rev* 2017;12 doi: 10.1002/14651858.CD003054.pub4.
38. Rienks J, Barbaresko J, Nothlings U. Association of isoflavone biomarkers with risk of chronic disease and mortality: a systematic review and meta-analysis of observational studies. *Nutrition Reviews* 2017;75(8) doi: <Go to ISI>://WOS:000408233400003
39. Wu J, Xun P, Tang Q, et al. Circulating magnesium levels and incidence of coronary heart diseases, hypertension, and type 2 diabetes mellitus: a meta-analysis of prospective cohort studies. *Nutr J* 2017;16(1):60. doi: 10.1186/s12937-017-0280-3
40. Wu JHY, Marklund M, Imamura F, et al. Omega-6 fatty acid biomarkers and incident type 2 diabetes: pooled analysis of individual-level data for 39 740 adults from 20 prospective cohort studies. *Lancet Diabetes Endocrinol* 2017 doi: 10.1016/S2213-8587(17)30307-8
41. Lucato P, Solmi M, Maggi S, et al. Low vitamin D levels increase the risk of type 2 diabetes in older adults: A systematic review and meta-analysis. *Maturitas* 2017;100 doi: <Go to ISI>://WOS:000406731800002
42. Rees K, Hartley L, Day C, et al. Selenium supplementation for the primary prevention of cardiovascular disease. *Cochrane Database Syst Rev* 2013(1):CD009671. doi: 10.1002/14651858.CD009671.pub2
43. Mao S, Zhang A, Huang S. Selenium supplementation and the risk of type 2 diabetes mellitus: a meta-analysis of randomized controlled trials. *Endocrine* 2014;47(3):758-63. doi: 10.1007/s12020-014-0298-7
44. Goldie C, Taylor AJ, Nguyen P, et al. Niacin therapy and the risk of new-onset diabetes: a meta-analysis of randomised controlled trials. *Heart* 2016;102(3):198-203. doi: 10.1136/heartjnl-2015-308055
45. He S, Yu S, Zhou Z, et al. Effect of vitamin D supplementation on fasting plasma glucose, insulin resistance and prevention of type 2 diabetes mellitus in non-diabetics: A systematic review and meta-analysis. *Biomedical Reports* 8 (5) (pp 475-484) 2018:May.
46. Taylor JS, Kacmar JE, Nothnagle M, et al. A systematic review of the literature associating breastfeeding with type 2 diabetes and gestational diabetes. *Journal of the American College of Nutrition* 2005;24(5) doi: <Go to ISI>://WOS:000232074800003
47. Legrand D, Scheen AJ. [Does coffee protect against type 2 diabetes?]. *Rev Med Liege* 2007;62(9)
48. Povey RC, Clark-Carter D. Diabetes and healthy eating - A systematic review of the literature. *Diabetes Educator* 2007;33(6) doi: <Go to ISI>://WOS:000251449000003
49. van de Laar FA, Akkermans RP, Van Binsbergen JJ. Limited evidence for effects of diet for type 2 diabetes from systematic reviews. *European Journal of Clinical Nutrition* 2007;61(8) doi: <Go to ISI>://WOS:000248556300001
50. Venn BJ, Green TJ. Glycemic index and glycemic load: measurement issues and their effect on diet-disease relationships. *European Journal of Clinical Nutrition* 2007;61 doi: <Go to ISI>://WOS:000250894800008
51. Bartlett HE, Eperjesi F. Nutritional supplementation for type 2 diabetes: a systematic review. *Ophthalmic and Physiological Optics* 2008;28(6) doi: <Go to ISI>://WOS:000260528900001

52. Priebe MG, Van Binsbergen JJ, De Vos R, et al. Whole grain foods for the prevention of type 2 diabetes mellitus - A systematic review. *Diabetes* 2008;57 doi: <Go to ISI>://WOS:000256612001307
53. Kastorini CM, Panagiotakos DB. Dietary patterns and prevention of type 2 diabetes: from research to clinical practice; a systematic review. *Curr Diabetes Rev* 2009;5(4)
54. Esposito K, Maiorino MI, Ceriello A, et al. Prevention and control of type 2 diabetes by Mediterranean diet: a systematic review. *Diabetes Res Clin Pract* 2010;89(2):97-102. doi: 10.1016/j.diabres.2010.04.019
55. Malik VS, Popkin BM, Bray GA, et al. Sugar-Sweetened Beverages, Obesity, Type 2 Diabetes Mellitus, and Cardiovascular Disease Risk. *Circulation* 2010;121(11) doi: <Go to ISI>://WOS:000275863200012
56. Pittas AG, Chung M, Trikalinos T, et al. Systematic Review: Vitamin D and Cardiometabolic Outcomes. *Annals of Internal Medicine* 2010;152(5) doi: <Go to ISI>://WOS:000275329600006
57. Martinez-Gonzalez MA, de la Fuente-Arrillaga C, Lopez-del-Burgo C, et al. Low consumption of fruit and vegetables and risk of chronic disease: a review of the epidemiological evidence and temporal trends among Spanish graduates. *Public Health Nutrition* 2011;14(12A) doi: <Go to ISI>://WOS:000298730800007
58. Rafnsson SB, Saravanan P, Bhopal RS, et al. Is a low blood level of vitamin B12 a cardiovascular and diabetes risk factor? A systematic review of cohort studies. *European Journal of Nutrition* 2011;50(2) doi: <Go to ISI>://WOS:000287750300003
59. Imam MU, Azmi NH, Bhangar MI, et al. Antidiabetic Properties of Germinated Brown Rice: A Systematic Review. *Evidence-Based Complementary and Alternative Medicine* 2012 doi: <Go to ISI>://WOS:000312315100001
60. McEvoy CT, Temple N, Woodside JV. Vegetarian diets, low-meat diets and health: a review. *Public Health Nutrition* 2012;15(12) doi: <Go to ISI>://WOS:000311285500018
61. Muley A, Muley P, Shah M. Coffee to reduce risk of type 2 diabetes?: a systematic review. *Curr Diabetes Rev* 2012;8(3)
62. Sonestedt E, Overby NC, Laaksonen DE, et al. Does high sugar consumption exacerbate cardiometabolic risk factors and increase the risk of type 2 diabetes and cardiovascular disease? *Food & Nutrition Research* 2012;56 doi: <Go to ISI>://WOS:000317133400001
63. Akesson A, Andersen LF, Kristjansdottir AG, et al. Health effects associated with foods characteristic of the Nordic diet: a systematic literature review. *Food & Nutrition Research* 2013;57 doi: <Go to ISI>://WOS:000325546800001
64. Al-Khudairy L, Stranges S, Kumar S, et al. Dietary Factors and Type 2 Diabetes in the Middle East: What Is the Evidence for an Association?-A Systematic Review. *Nutrients* 2013;5(10) doi: <Go to ISI>://WOS:000328627900005
65. Neves Ribeiro D, Goncalves Alfenas Rde C, Bressan J, et al. The effect of oilseed consumption on appetite and on the risk of developing type 2 diabetes mellitus. *Nutr Hosp* 2013;28(2) doi: 10.3305/nh.2013.28.2.6309.
66. Rebello SA, van Dam RM. Coffee Consumption and Cardiovascular Health: Getting to the Heart of the Matter. *Current Cardiology Reports* 2013;15(10) doi: <Go to ISI>://WOS:000345083500003
67. Sluijs I, Beulens JW, van der Schouw YT, et al. Dietary glycemic index, glycemic load, and digestible carbohydrate intake are not associated with risk of type 2 diabetes in eight European countries. *J Nutr* 2013;143(1) doi: 10.3945/jn.112.165605. Epub 2012 Nov 28.
68. Tanabe FH, Drehmer M, Neutzling MB. Food consumption and dietary factors involved in health and disease in Nikkeis: systematic review. *Revista De Saude Publica* 2013;47(3) doi: <Go to ISI>://WOS:000328943800022
69. van Dam RM, Naidoo N, Landberg R. Dietary flavonoids and the development of type 2 diabetes and cardiovascular diseases: review of recent findings. *Current Opinion in Lipidology* 2013;24(1) doi: <Go to ISI>://WOS:000313550500005

70. White DL, Collinson A. Red Meat, Dietary Heme Iron, and Risk of Type 2 Diabetes: The Involvement of Advanced Lipoxidation Endproducts. *Advances in Nutrition* 2013;4(4) doi: <Go to ISI>://WOS:000323141000001
71. Barnard N, Levin S, Trapp C. Meat consumption as a risk factor for type 2 diabetes. *Nutrients* 2014;6(2) doi: 10.3390/nu6020897.
72. Fardet A, Boirie Y. Associations between food and beverage groups and major diet-related chronic diseases: an exhaustive review of pooled/meta-analyses and systematic reviews. *Nutrition Reviews* 2014;72(12) doi: <Go to ISI>://WOS:000347171400002
73. Fernandez ML, Andersen CJ. Effects of dietary cholesterol in diabetes and cardiovascular disease. *Clinical Lipidology* 2014;9(6) doi: <Go to ISI>://WOS:000346665200003
74. Grosso G, Mistretta A, Frigiola A, et al. Mediterranean Diet and Cardiovascular Risk Factors: A Systematic Review. *Critical Reviews in Food Science and Nutrition* 2014;54(5) doi: <Go to ISI>://WOS:000327186000005
75. Lopez VL, Medina JAL, Gutierrez MV, et al. CARBOHYDRATE: CURRENT ROLE IN DIABETES MELLITUS AND METABOLIC DISEASE. *Nutricion Hospitalaria* 2014;30(5) doi: <Go to ISI>://WOS:000345058900005
76. Derbyshire E, Ruxton C. Red meat consumption and type 2 diabetes mellitus risk A systematic review of the evidence. *Nutrition & Food Science* 2015;45(4) doi: <Go to ISI>://WOS:000213483700002
77. Dutta S. SWEET POTATOES FOR DIABETES MELLITUS: A SYSTEMATIC REVIEW. *Pharmacophore* 2015;6(1) doi: <Go to ISI>://WOS:000219816100005
78. El Dib R, Gameiro OL, Ogata MS, et al. Zinc supplementation for the prevention of type 2 diabetes mellitus in adults with insulin resistance. *Cochrane Database Syst Rev* 2015(5) doi: 10.1002/14651858.CD005525.pub3.
79. Ha V, Cozma AI, Choo VLW, et al. Do Fructose-Containing Sugars Lead to Adverse Health Consequences? Results of Recent Systematic Reviews and Meta-analyses. *Advances in Nutrition* 2015;6(4) doi: <Go to ISI>://WOS:000358224000015
80. Izadi V, Azadbakht L. Is there any association between rice consumption and some of the cardiovascular diseases risk factors? A systematic review. *Arya Atherosclerosis* 2015;11 doi: <Go to ISI>://WOS:000374288800008
81. Li D. Omega-3 polyunsaturated fatty acids and non-communicable diseases: meta-analysis based systematic review. *Asia Pacific Journal of Clinical Nutrition* 2015;24(1) doi: <Go to ISI>://WOS:000350828000002
82. Sayon-Orea C, Carlos S, Martinez-Gonzalez MA. Does cooking with vegetable oils increase the risk of chronic diseases?: a systematic review. *British Journal of Nutrition* 2015;113 doi: <Go to ISI>://WOS:000372517300006
83. Borch D, Juul-Hindsgaul N, Veller M, et al. Potatoes and risk of obesity, type 2 diabetes, and cardiovascular disease in apparently healthy adults: a systematic review of clinical intervention and observational studies. *American Journal of Clinical Nutrition* 2016;104(2) doi: <Go to ISI>://WOS:000381870200030
84. Chu A, Foster M, Samman S. Zinc Status and Risk of Cardiovascular Diseases and Type 2 Diabetes Mellitus-A Systematic Review of Prospective Cohort Studies. *Nutrients* 2016;8(11) doi: <Go to ISI>://WOS:000388666400042
85. Drouin-Chartier JP, Brassard D, Tessier-Grenier M, et al. Systematic Review of the Association between Dairy Product Consumption and Risk of Cardiovascular-Related Clinical Outcomes. *Advances in Nutrition* 2016;7(6) doi: <Go to ISI>://WOS:000392284700004
86. Khan TA, Sievenpiper JL. Controversies about sugars: results from systematic reviews and meta-analyses on obesity, cardiometabolic disease and diabetes. *European Journal of Nutrition* 2016;55 doi: <Go to ISI>://WOS:000394167500003
87. Kouvari M, Notara V, Kalogeropoulos N, et al. Diabetes mellitus associated with processed and unprocessed red meat: an overview. *International Journal of Food Sciences and Nutrition* 2016;67(7) doi: <Go to ISI>://WOS:000382817500002

88. Rippe JM, Angelopoulos TJ. Relationship between Added Sugars Consumption and Chronic Disease Risk Factors: Current Understanding. *Nutrients* 2016;8(11) doi: <Go to ISI>://WOS:000388666400032
89. Stanhope KL. Sugar consumption, metabolic disease and obesity: The state of the controversy. *Critical Reviews in Clinical Laboratory Sciences* 2016;53(1) doi: <Go to ISI>://WOS:000377601700005
90. Grosso G, Godos J, Galvano F, et al. Coffee, Caffeine, and Health Outcomes: An Umbrella Review. In: Stover PJ, Balling R, eds. 2017.
91. McRae MP. Health Benefits of Dietary Whole Grains: An Umbrella Review of Meta-analyses. *Journal of Chiropractic Medicine* 2017;16(1) doi: <Go to ISI>://WOS:000395327500002
92. Tabeshpour J, Razavi BM, Hosseinzadeh H. Effects of Avocado (*Persea americana*) on Metabolic Syndrome: A Comprehensive Systematic Review. *Phytotherapy Research* 2017;31(6) doi: <Go to ISI>://WOS:000402958900001
93. Vigiouliouk E, Blanco Mejia S, Kendall CW, et al. Can pulses play a role in improving cardiometabolic health? Evidence from systematic reviews and meta-analyses. *Ann N Y Acad Sci* 2017;1392(1) doi: 10.1111/nyas.13312. Epub 2017 Mar 2.
94. Dinu M, Pagliai G, Casini A, et al. Mediterranean diet and multiple health outcomes: an umbrella review of meta-analyses of observational studies and randomised trials. *European Journal of Clinical Nutrition* 2018;72(1) doi: <Go to ISI>://WOS:000419795000004
95. Yip CSC, Lam W, Fielding R. A summary of meat intakes and health burdens. *European Journal of Clinical Nutrition* 2018;72(1) doi: <Go to ISI>://WOS:000419795000003
96. Qiu Q, Zhang F, Zhu W, et al. Copper in Diabetes Mellitus: a Meta-Analysis and Systematic Review of Plasma and Serum Studies. *Biol Trace Elem Res* 2017;177(1) doi: 10.1007/s12011-016-0877-y. Epub 2016 Oct 26.
97. Howard AA, Arnsten JH, Gourevitch MN. Effect of alcohol consumption on diabetes mellitus - A systematic review. *Annals of Internal Medicine* 2004;140(3) doi: <Go to ISI>://WOS:000188704500007
98. Seike N, Noda M, Kadowaki T. Alcohol consumption and risk of type 2 diabetes mellitus in Japanese: a systematic review. *Asia Pacific Journal of Clinical Nutrition* 2008;17(4) doi: <Go to ISI>://WOS:000262520400001
99. Akhuemokhan IK, Eregie A, Fasanmade OA. Diabetes prevention and Management: The role of trace minerals. *African Journal of Diabetes Medicine* 21 (2) (pp 37-41) 2013:2013.
100. Muraki I, Imamura F, Hu FB, et al. Consumption of specific fruits and incidence of type 2 diabetes in men and women. *Circulation Conference: American Heart Association's Epidemiology and Prevention/Physical Activity, Nutrition and Metabolism* 2013(var.pagings):26.
101. Chanson-Rolle A, Meynier A, Aubin F, et al. Systematic review and meta-analysis of human studies to support a quantitative recommendation for whole grain intake in relation to type 2 diabetes. *PLoS ONE* 10 (6) (no pagination) 2015:e0131377.
102. Sluik D, Jankovic N, Hughes M, et al. Alcoholic beverage preference and diabetes incidence across Europe: The Consortium on Health and Ageing Network of Cohorts in Europe and the United States (CHANCES) project. *European Journal of Clinical Nutrition* 71 (5) (pp 659-668) 2017:01.
103. Laaksonen MA, Knekt P, Rissanen H, et al. The relative importance of modifiable potential risk factors of type 2 diabetes: a meta-analysis of two cohorts. *European Journal of Epidemiology* 2010;25(2) doi: <Go to ISI>://WOS:000274461600007
104. van Woudenberg GJ, Kuijsten A, Drogan D, et al. Tea Consumption and Incidence of Type 2 Diabetes in Europe: The EPIC-InterAct Case-Cohort Study. *Plos One* 2012;7(5) doi: <Go to ISI>://WOS:000305353400016
105. Buijsse B, Boeing H, Drogan D, et al. Consumption of fatty foods and incident type 2 diabetes in populations from eight European countries. *European Journal of Clinical Nutrition* 2015;69(4) doi: <Go to ISI>://WOS:000352216300008

106. Kieft-de Jong JC, Li Y, Chen M, et al. Diet-dependent acid load and type 2 diabetes: pooled results from three prospective cohort studies. *Diabetologia* 2017;60(2) doi: 10.1007/s00125-016-4153-7. Epub 2016 Nov 17.
107. Mamluk L, O'Doherty MG, Orfanos P, et al. Fruit and vegetable intake and risk of incident of type 2 diabetes: results from the consortium on health and ageing network of cohorts in Europe and the United States (CHANCES). *Eur J Clin Nutr* 2017;71(1):83-91. doi: 10.1038/ejcn.2016.143
108. Povey R, Clark-Carter D. Diabetes and healthy eating: A systematic review of dietary interventions. *Psychology & Health* 2008;23 doi: <Go to ISI>://WOS:000260047300491
109. Kendall CW, Sievenpiper JL, Esfahani A, et al. DIETARY PULSES AND DIABETES CONTROL: A META-ANALYSIS OF RANDOMIZED CONTROLLED TRIALS. *Annals of Nutrition and Metabolism* 2009;55 doi: <Go to ISI>://WOS:000270827201410
110. Hruby A, Ngwa JS, Meigs JB, et al. Meta-analysis of interaction between dietary magnesium intake and genetic risk variants on diabetes phenotypes in the CHARGE Consortium. *Faseb Journal* 2012;26 doi: <Go to ISI>://WOS:000310711300935
111. Afshin A, Micha R, Khatibzadeh S, et al. Consumption of Nuts and Beans and Risk of Incident Coronary Heart Disease, Stroke, and Diabetes Mellitus: A Systematic Review and Meta-analysis. *Circulation* 2013;127(12) doi: <Go to ISI>://WOS:000330596100073
112. Chanson-Rolle A, Lappi J, Meynier A, et al. HEALTH BENEFITS OF WHOLEGRAIN - A SYSTEMATIC REVIEW OF THE SCIENTIFIC EVIDENCE TO PROPOSE A DAILY INTAKE. *Annals of Nutrition and Metabolism* 2013;63 doi: <Go to ISI>://WOS:000324548203586
113. McEvoy C, Cardwell C, Woodside J, et al. A SYSTEMATIC REVIEW AND META-ANALYSIS EXAMINING 'A POSTERIORI' DIETARY PATTERNS AND RISK OF TYPE 2 DIABETES. *Annals of Nutrition and Metabolism* 2013;63 doi: <Go to ISI>://WOS:000324548203129
114. Tamez M, Micha R, Lajous M, et al. Processed and Unprocessed Red Meat Consumption and Incident Type 2 Diabetes Mellitus: An Updated Systematic Review and Meta-Analysis. *Circulation* 2013;127(12) doi: <Go to ISI>://WOS:000330596100138
115. Threapleton DE, Greenwood DC, Evans C, et al. Dietary fibre intake and diabetes risk: a systematic review and meta-analysis of prospective studies. *Proceedings of the Nutrition Society* 2013;72(OCE4) doi: <Go to ISI>://WOS:000330353600075
116. Autier P, Pizot C, Boniol M, et al. Vitamin D Status and Diabetes: Meta-analyses of Randomized Intervention Studies. *Diabetes* 2014;63 doi: <Go to ISI>://WOS:000359481602144
117. Panagiotakos D, Pitsavos C, Koloverou E, et al. MEDITERRANEAN DIET AND DIABETES DEVELOPMENT: A META-ANALYSIS OF 12 STUDIES AND 140,001 INDIVIDUALS. *Journal of the American College of Cardiology* 2014;63(12) doi: <Go to ISI>://WOS:000359579102107
118. Seida JC, Mitri J, Colmers IN, et al. Effect of Vitamin D Supplementation on Improving Glycemic Control and Preventing Diabetes: A Systematic Review. *Diabetes* 2014;63 doi: <Go to ISI>://WOS:000359481602204
119. Bylsma L, Miller P, Alexander D. A Review and Meta-Analysis of Red Meat Consumption and Type 2 Diabetes. *Faseb Journal* 2015;29 doi: <Go to ISI>://WOS:000361722705442
120. Derbyshire EJ, Ruxton CHS. Red meat consumption and type 2 diabetes: a systematic review of the evidence. *Proceedings of the Nutrition Society* 2015;74(OCE5) doi: <Go to ISI>://WOS:000362835100071
121. Murphy AM, Murphy L, Smith CE, et al. Meta-Analysis of 19,005 Individuals Identifies Interplay Between Dietary Saturated Fats and Genetic Variants of the NLRP3 Inflammasome, to Modulate Insulin Resistance and Diabetes Risk. *Faseb Journal* 2017;31 doi: <Go to ISI>://WOS:000405986500045
122. Sievenpiper JL. Sugars in obesity and diabetes: Results of systematic reviews and meta-analyses. *Annals of Nutrition and Metabolism* 2015;67 doi: <Go to ISI>://WOS:000374988800020
123. Alhazmi A, Stojanovski E, McEvoy M, et al. Association between dietary pattern and type 2 diabetes: A systematic literature review and meta-analysis. *Australasian Medical JournalConference: 35th Annual Scientific Meeting Joint Annual Scientific Meeting of the*



- Nutrition Society of New Zealand and the Nutrition Society of Australia Queenstown New Zealand Conference Publication: (varpagings)4 (12) 2011:2011.*
124. Aguiar E, Morgan P, Collins C, et al. Effectiveness of lifestyle interventions including resistance training for type 2 diabetes prevention: A systematic review and meta-analysis. *Journal of Science and Medicine in Sport Conference: Be Active 2012*(var.pagings):December.
  125. Aguiar E, Morgan P, Collins C, et al. The effectiveness of multi-component Type 2 Diabetes prevention programs including diet, aerobic exercise and resistance training: A systematic review and meta-analyses. *Obesity Research and Clinical Practice Conference: 2012*(var.pagings):October.
  126. Chacko S, Ye EQ, Chou EL, et al. Relation of whole grain intake to risk of type 2 diabetes, cardiovascular disease and weight gain: A systematic review and meta-analysis. *FASEB Journal Conference: Experimental Biology 2012*(var.pagings):April.
  127. Hu EA, Sun Q, Pan A, et al. White rice consumption and risk of type 2 diabetes: A meta-analysis and systematic review. *Circulation Conference: Epidemiology and Prevention/Physical Activity, Nutrition and Metabolism 2012*(var.pagings):13.
  128. Shin JY, Xun P, He K. Egg consumption and risk of cardiovascular disease: Meta-analysis. *Diabetes Conference: 72nd Scientific Sessions of the American Diabetes Association Philadelphia, PA United States Conference Publication: (varpagings)61 (SUPPL1) (pp A379-A380) 2012:June.*
  129. Tajima R, Kodama S, Horikawa C, et al. A meta-analysis of the quantitative relationship between fat intake and incident DM. *Diabetes Conference: 72nd Scientific Sessions of the American Diabetes Association Philadelphia, PA United States Conference Publication: (varpagings)61 (SUPPL1) (pp A190-A191) 2012:June.*
  130. Merlotti C, Morabito A, Pontiroli AE. Prevention of type 2 diabetes; A systematic review and meta-analysis of different intervention strategies. *Diabetologia Conference: 49th Annual Meeting of the European Association for the Study of Diabetes, EASD 2013*(var.pagings):September.
  131. Morabito A, Merlotti C, Pontiroli AE. Prevention of type 2 diabetes: A systematic review and meta-analysis of different intervention strategies. *Diabetes Conference: 73rd Scientific Sessions of the American Diabetes Association Chicago, IL United States Conference Publication: (varpagings)62 (SUPPL1) (pp A409) 2013:July.*
  132. Chen M, Sun Q, Giovannucci E, et al. Dairy consumption and risk of type 2 diabetes: 3 cohorts of us adults and an updated meta-analysis. *Circulation Conference: American Heart Association's Epidemiology and Prevention/Nutrition, Physical Activity, and Metabolism 2014*(var.pagings):25.
  133. Matsumoto C, Sesso HD, Gaziano JM, et al. Caffeine intake may be associated with a lower risk of type 2 diabetes in the physicians' health study and meta-analysis. *Circulation Conference: American Heart Association's Epidemiology and Prevention/Nutrition, Physical Activity, and Metabolism 2014*(var.pagings):25.
  134. Panagiotakos D, Pitsavos C, Koloverou E, et al. Mediterranean diet and diabetes development: A meta-analysis of 12 studies and 140,001 individuals. *Journal of the American College of Cardiology Conference: 63rd Annual Scientific Session of the American College of Cardiology and i2 Summit: Innovation in Intervention, ACC14 Washington, DC United States Conference Publication: (varpagings)63 (12 2014:01.*
  135. Jannasch F, Kroger J, Schulze M. Dietary patterns and Type 2 Diabetes-systematic review and meta-analysis. *European Journal of Epidemiology Conference: Health - Exploring Complexity: An Interdisciplinary Systems Approach, HEC 2016*(Supplement 1):August.
  136. Malik VS, Popkin BM, Bray GA, et al. Sugar-sweetened beverages and risk of metabolic syndrome and type 2 diabetes: a meta-analysis. *Diabetes Care 2010*;33(11) doi: 10.2337/dc10-1079. Epub 2010 Aug 6.
  137. Aune D, Norat T, Romundstad P, et al. Whole grain and refined grain consumption and the risk of type 2 diabetes: a systematic review and dose-response meta-analysis of cohort studies. *Eur J Epidemiol 2013*;28(11) doi: 10.1007/s10654-013-9852-5. Epub 2013 Oct 25.
  138. Imamura F, O'Connor L, Ye Z, et al. Consumption of sugar sweetened beverages, artificially sweetened beverages, and fruit juice and incidence of type 2 diabetes: systematic review, meta-

- analysis, and estimation of population attributable fraction. *British Journal of Sports Medicine* 2016;50(8) doi: <Go to ISI>://WOS:000373706000013
139. Carter P, Troughton J, Gray L, et al. Increasing green leafy vegetable consumption can decrease the risk of type 2 diabetes. *Diabetic Medicine Conference: Diabetes UK Annual Professional Conference Liverpool United Kingdom Conference Publication: (varpagings)27 (2 SUPPL1) (pp 109)* 2010:March.
  140. Liu Z, Wei P, Li X. Is nut consumption associated with decreased risk of type 2 diabetes? *Am J Clin Nutr* 2014;100(5) doi: 10.3945/ajcn.114.093302.
  141. Zhao M, Liu W. Nut consumption decreases risk of some diseases. *Am J Clin Nutr* 2014;100(3) doi: 10.3945/ajcn.114.091942.
  142. Hurtado-Torres GF. Comment on: Chocolate Consumption and Risk of Coronary Heart Disease, Stroke, and Diabetes: A Meta-analysis of prospective Studies, *Nutrients* 2017, 9, 688. *Nutrients* 2017;9(8) doi: <Go to ISI>://WOS:000408688100059
  143. Shang XW, Scott D, Hodge AM, et al. Nonlinear relation between animal protein intake and risk of type 2 diabetes: a dose-response meta-analysis of prospective studies Reply. *American Journal of Clinical Nutrition* 2017;105(4) doi: <Go to ISI>://WOS:000398941700036
  144. Cene CW, Pignone M. The effect of fruit and vegetable intake on the incidence of diabetes. *Clinical Diabetes* 29 (3) (pp 113-115) 2011:2011.
  145. Esposito K, Giugliano D. Increased consumption of green leafy vegetables, but not fruit, vegetables or fruit and vegetables combined, is associated with reduced incidence of type 2 diabetes. *Evidence-Based Medicine* 16 (1) (pp 27-28) 2011:February.
  146. The Effects of Macronutrient Intake on the Risk of Developing Type 2 Diabetes: A Systematic Review. *JBI Libr Syst Rev* 2011;9(16 Suppl)
  147. The Effects of Dietary Pattern on the Risk of Developing Type 2 Diabetes: A Systematic Review. *JBI Libr Syst Rev* 2011;9(16 Suppl)
  148. Muilwijk M, Stronks K, Qureshi SA, et al. Dietary and physical activity strategies to prevent type 2 diabetes in South Asian adults: protocol for a systematic review. *Bmj Open* 2017;7(6) doi: 10.1136/bmjopen-2016-012783.
  149. Probst YC, Guan VX, Kent K. Dietary phytochemical intake from foods and health outcomes: a systematic review protocol and preliminary scoping. *Bmj Open* 2017;7(2) doi: <Go to ISI>://WOS:000397872400064
  150. Laparra AT. Systematic review and meta-analysis of different dietary approaches to the management of type 2 diabetes. *Revista Espanola De Nutricion Humana Y Dietetica* 2017;21(4) doi: <Go to ISI>://WOS:000423944100010
  151. Esposito K, Kastorini CM, Panagiotakos DB, et al. Prevention of type 2 diabetes by dietary patterns: a systematic review of prospective studies and meta-analysis. *Metab Syndr Relat Disord* 2010;8(6):471-6. doi: 10.1089/met.2010.0009
  152. McEvoy CT, Cardwell CR, Woodside JV, et al. A posteriori dietary patterns are related to risk of type 2 diabetes: findings from a systematic review and meta-analysis. *J Acad Nutr Diet* 2014;114(11):1759-75 e4. doi: 10.1016/j.jand.2014.05.001
  153. Jannasch F, Kroger J, Schulze MB. Dietary Patterns and Type 2 Diabetes: A Systematic Literature Review and Meta-Analysis of Prospective Studies. *J Nutr* 2017;147(6):1174-82. doi: 10.3945/jn.116.242552
  154. Schwingshackl L, Hoffmann G. Diet quality as assessed by the Healthy Eating Index, the Alternate Healthy Eating Index, the Dietary Approaches to Stop Hypertension score, and health outcomes: a systematic review and meta-analysis of cohort studies. *J Acad Nutr Diet* 2015;115(5):780-800 e5. doi: 10.1016/j.jand.2014.12.009
  155. Schwingshackl L, Missbach B, Konig J, et al. Adherence to a Mediterranean diet and risk of diabetes: a systematic review and meta-analysis. *Public Health Nutr* 2015;18(7):1292-9. doi: 10.1017/S1368980014001542
  156. Barclay AW, Petocz P, McMillan-Price J, et al. Glycemic index, glycemic load, and chronic disease risk--a meta-analysis of observational studies. *Am J Clin Nutr* 2008;87(3):627-37.

157. Dong JY, Zhang L, Zhang YH, et al. Dietary glycaemic index and glycaemic load in relation to the risk of type 2 diabetes: a meta-analysis of prospective cohort studies. *Br J Nutr* 2011;106(11):1649-54. doi: 10.1017/S000711451100540X
158. Greenwood DC, Threapleton DE, Evans CE, et al. Glycemic index, glycemic load, carbohydrates, and type 2 diabetes: systematic review and dose-response meta-analysis of prospective studies. *Diabetes Care* 2013;36(12):4166-71. doi: 10.2337/dc13-0325
159. Livesey G, Taylor R, Livesey H, et al. Is there a dose-response relation of dietary glycemic load to risk of type 2 diabetes? Meta-analysis of prospective cohort studies. *Am J Clin Nutr* 2013;97(3):584-96. doi: 10.3945/ajcn.112.041467
160. Pittas AG, Lau J, Hu FB, et al. The role of vitamin D and calcium in type 2 diabetes. A systematic review and meta-analysis. *J Clin Endocrinol Metab* 2007;92(6):2017-29. doi: 10.1210/jc.2007-0298
161. Elwood PC, Givens DI, Beswick AD, et al. The survival advantage of milk and dairy consumption: an overview of evidence from cohort studies of vascular diseases, diabetes and cancer. *J Am Coll Nutr* 2008;27(6):723S-34S.
162. Elwood PC, Pickering JE, Givens DI, et al. The consumption of milk and dairy foods and the incidence of vascular disease and diabetes: an overview of the evidence. *Lipids* 2010;45(10):925-39. doi: 10.1007/s11745-010-3412-5
163. Tong X, Dong JY, Wu ZW, et al. Dairy consumption and risk of type 2 diabetes mellitus: a meta-analysis of cohort studies. *Eur J Clin Nutr* 2011;65(9):1027-31. doi: 10.1038/ejcn.2011.62
164. Chen M, Sun Q, Giovannucci E, et al. Dairy consumption and risk of type 2 diabetes: 3 cohorts of US adults and an updated meta-analysis. *BMC Med* 2014;12:215. doi: 10.1186/s12916-014-0215-1
165. Khoramdad M, Alimohamadi Y, Safiri S, et al. Dairy Products Consumption and Risk of Type 2 Diabetes: A Systematic Review and Meta-Analysis of Prospective Cohort Studies. *Iran Red Crescent Me* 2017;19(7) doi: ARTN e14140  
10.5812/ircmj.14140
166. Li Y, Zhou C, Zhou X, et al. Egg consumption and risk of cardiovascular diseases and diabetes: a meta-analysis. *Atherosclerosis* 2013;229(2):524-30. doi: 10.1016/j.atherosclerosis.2013.04.003
167. Shin JY, Xun P, Nakamura Y, et al. Egg consumption in relation to risk of cardiovascular disease and diabetes: a systematic review and meta-analysis. *Am J Clin Nutr* 2013;98(1):146-59. doi: 10.3945/ajcn.112.051318
168. Djousse L, Khawaja OA, Gaziano JM. Egg consumption and risk of type 2 diabetes: a meta-analysis of prospective studies. *Am J Clin Nutr* 2016;103(2):474-80. doi: 10.3945/ajcn.115.119933
169. Tamez M, Virtanen JK, Lajous M. Egg consumption and risk of incident type 2 diabetes: a dose-response meta-analysis of prospective cohort studies. *Br J Nutr* 2016;115(12):2212-8. doi: 10.1017/S000711451600146X
170. Wallin A, Forouhi NG, Wolk A, et al. Egg consumption and risk of type 2 diabetes: a prospective study and dose-response meta-analysis. *Diabetologia* 2016;59(6):1204-13. doi: 10.1007/s00125-016-3923-6
171. Wallin A, Di Giuseppe D, Orsini N, et al. Fish consumption, dietary long-chain n-3 fatty acids, and risk of type 2 diabetes: systematic review and meta-analysis of prospective studies. *Diabetes Care* 2012;35(4):918-29. doi: 10.2337/dc11-1631
172. Xun P, He K. Fish Consumption and Incidence of Diabetes: meta-analysis of data from 438,000 individuals in 12 independent prospective cohorts with an average 11-year follow-up. *Diabetes Care* 2012;35(4):930-8. doi: 10.2337/dc11-1869
173. Zheng JS, Huang T, Yang J, et al. Marine N-3 polyunsaturated fatty acids are inversely associated with risk of type 2 diabetes in Asians: a systematic review and meta-analysis. *PLoS One* 2012;7(9):e44525. doi: 10.1371/journal.pone.0044525
174. Muley A, Muley P, Shah M. ALA, fatty fish or marine n-3 fatty acids for preventing DM?: a systematic review and meta-analysis. *Curr Diabetes Rev* 2014;10(3):158-65.

175. de Munter JS, Hu FB, Spiegelman D, et al. Whole grain, bran, and germ intake and risk of type 2 diabetes: a prospective cohort study and systematic review. *PLoS Med* 2007;4(8):e261. doi: 10.1371/journal.pmed.0040261
176. Ye EQ, Chacko SA, Chou EL, et al. Greater whole-grain intake is associated with lower risk of type 2 diabetes, cardiovascular disease, and weight gain. *J Nutr* 2012;142(7):1304-13. doi: 10.3945/jn.111.155325
177. Hu EA, Pan A, Malik V, et al. White rice consumption and risk of type 2 diabetes: meta-analysis and systematic review. *BMJ* 2012;344:e1454. doi: 10.1136/bmj.e1454
178. Krittanawong C, Tunhasiriwet A, Zhang H, et al. Is white rice consumption a risk for metabolic and cardiovascular outcomes? A systematic review and meta-analysis. *Heart Asia* 2017;9(2):e010909. doi: 10.1136/heartasia-2017-010909
179. Li W, Ruan W, Peng Y, et al. Soy and the risk of type 2 diabetes mellitus: A systematic review and meta-analysis of observational studies. *Diabetes Res Clin Pract* 2018;137:190-99. doi: 10.1016/j.diabres.2018.01.010
180. Afshin A, Micha R, Khatibzadeh S, et al. Consumption of nuts and legumes and risk of incident ischemic heart disease, stroke, and diabetes: a systematic review and meta-analysis. *Am J Clin Nutr* 2014;100(1):278-88. doi: 10.3945/ajcn.113.076901
181. Luo C, Zhang Y, Ding Y, et al. Nut consumption and risk of type 2 diabetes, cardiovascular disease, and all-cause mortality: a systematic review and meta-analysis. *Am J Clin Nutr* 2014;100(1):256-69. doi: 10.3945/ajcn.113.076109
182. Zhou D, Yu H, He F, et al. Nut consumption in relation to cardiovascular disease risk and type 2 diabetes: a systematic review and meta-analysis of prospective studies. *Am J Clin Nutr* 2014;100(1):270-7. doi: 10.3945/ajcn.113.079152
183. Guo K, Zhou Z, Jiang Y, et al. Meta-analysis of prospective studies on the effects of nut consumption on hypertension and type 2 diabetes mellitus. *J Diabetes* 2015;7(2):202-12. doi: 10.1111/1753-0407.12173
184. Wu L, Wang Z, Zhu J, et al. Nut consumption and risk of cancer and type 2 diabetes: a systematic review and meta-analysis. *Nutr Rev* 2015;73(7):409-25. doi: 10.1093/nutrit/nuv006
185. Wu Y, Zhang D, Jiang X, et al. Fruit and vegetable consumption and risk of type 2 diabetes mellitus: a dose-response meta-analysis of prospective cohort studies. *Nutr Metab Cardiovasc Dis* 2015;25(2):140-7. doi: 10.1016/j.numecd.2014.10.004
186. Carter P, Gray LJ, Troughton J, et al. Fruit and vegetable intake and incidence of type 2 diabetes mellitus: systematic review and meta-analysis. *BMJ* 2010;341:c4229. doi: 10.1136/bmj.c4229
187. Li S, Miao S, Huang Y, et al. Fruit intake decreases risk of incident type 2 diabetes: an updated meta-analysis. *Endocrine* 2015;48(2):454-60. doi: 10.1007/s12020-014-0351-6
188. van Dam RM, Hu FB. Coffee consumption and risk of type 2 diabetes: a systematic review. *JAMA* 2005;294(1):97-104. doi: 10.1001/jama.294.1.97
189. Huxley R, Lee CM, Barzi F, et al. Coffee, decaffeinated coffee, and tea consumption in relation to incident type 2 diabetes mellitus: a systematic review with meta-analysis. *Arch Intern Med* 2009;169(22):2053-63. doi: 10.1001/archinternmed.2009.439
190. Jiang X, Zhang D, Jiang W. Coffee and caffeine intake and incidence of type 2 diabetes mellitus: a meta-analysis of prospective studies. *Eur J Nutr* 2014;53(1):25-38. doi: 10.1007/s00394-013-0603-x
191. Jing Y, Han G, Hu Y, et al. Tea consumption and risk of type 2 diabetes: a meta-analysis of cohort studies. *J Gen Intern Med* 2009;24(5):557-62. doi: 10.1007/s11606-009-0929-5
192. Yang J, Mao QX, Xu HX, et al. Tea consumption and risk of type 2 diabetes mellitus: a systematic review and meta-analysis update. *BMJ Open* 2014;4(7):e005632. doi: 10.1136/bmjopen-2014-005632
193. Malik VS, Popkin BM, Bray GA, et al. Sugar-sweetened beverages and risk of metabolic syndrome and type 2 diabetes: a meta-analysis. *Diabetes Care* 2010;33(11):2477-83. doi: 10.2337/dc10-1079

194. Greenwood DC, Threapleton DE, Evans CE, et al. Association between sugar-sweetened and artificially sweetened soft drinks and type 2 diabetes: systematic review and dose-response meta-analysis of prospective studies. *Br J Nutr* 2014;112(5):725-34. doi: 10.1017/S0007114514001329
195. Wang M, Yu M, Fang L, et al. Association between sugar-sweetened beverages and type 2 diabetes: A meta-analysis. *J Diabetes Investig* 2015;6(3):360-6. doi: 10.1111/jdi.12309
196. Chen C, Yang Y, Yu X, et al. Association between omega-3 fatty acids consumption and the risk of type 2 diabetes: A meta-analysis of cohort studies. *J Diabetes Investig* 2017;8(4):480-88. doi: 10.1111/jdi.12614
197. Yao B, Fang H, Xu W, et al. Dietary fiber intake and risk of type 2 diabetes: a dose-response analysis of prospective studies. *Eur J Epidemiol* 2014;29(2):79-88. doi: 10.1007/s10654-013-9876-x
198. Schulze MB, Schulz M, Heidemann C, et al. Fiber and magnesium intake and incidence of type 2 diabetes: a prospective study and meta-analysis. *Arch Intern Med* 2007;167(9):956-65. doi: 10.1001/archinte.167.9.956
199. Mitri J, Muraru MD, Pittas AG. Vitamin D and type 2 diabetes: a systematic review. *Eur J Clin Nutr* 2011;65(9):1005-15. doi: 10.1038/ejcn.2011.118
200. Seida JC, Mitri J, Colmers IN, et al. Clinical review: Effect of vitamin D3 supplementation on improving glucose homeostasis and preventing diabetes: a systematic review and meta-analysis. *J Clin Endocrinol Metab* 2014;99(10):3551-60. doi: 10.1210/jc.2014-2136
201. Khan H, Kunutsor S, Franco OH, et al. Vitamin D, type 2 diabetes and other metabolic outcomes: a systematic review and meta-analysis of prospective studies. *Proc Nutr Soc* 2013;72(1):89-97. doi: 10.1017/S0029665112002765
202. Zhao Z, Li S, Liu G, et al. Body iron stores and heme-iron intake in relation to risk of type 2 diabetes: a systematic review and meta-analysis. *PLoS One* 2012;7(7):e41641. doi: 10.1371/journal.pone.0041641
203. Kunutsor SK, Apekey TA, Walley J, et al. Ferritin levels and risk of type 2 diabetes mellitus: an updated systematic review and meta-analysis of prospective evidence. *Diabetes Metab Res Rev* 2013;29(4):308-18. doi: 10.1002/dmrr.2394
204. Larsson SC, Wolk A. Magnesium intake and risk of type 2 diabetes: a meta-analysis. *J Intern Med* 2007;262(2):208-14. doi: 10.1111/j.1365-2796.2007.01840.x
205. Dong JY, Xun P, He K, et al. Magnesium intake and risk of type 2 diabetes: meta-analysis of prospective cohort studies. *Diabetes Care* 2011;34(9):2116-22. doi: 10.2337/dc11-0518
206. Xu T, Chen GC, Zhai L, et al. Nonlinear Reduction in Risk for Type 2 Diabetes by Magnesium Intake: An Updated Meta-Analysis of Prospective Cohort Studies. *Biomed Environ Sci* 2015;28(7):527-34. doi: 10.3967/bes2015.075
207. Fang X, Han H, Li M, et al. Dose-Response Relationship between Dietary Magnesium Intake and Risk of Type 2 Diabetes Mellitus: A Systematic Review and Meta-Regression Analysis of Prospective Cohort Studies. *Nutrients* 2016;8(11) doi: 10.3390/nu8110739
208. Liu YJ, Zhan J, Liu XL, et al. Dietary flavonoids intake and risk of type 2 diabetes: a meta-analysis of prospective cohort studies. *Clin Nutr* 2014;33(1):59-63. doi: 10.1016/j.clnu.2013.03.011
209. Shang X, Scott D, Hodge AM, et al. Dietary protein intake and risk of type 2 diabetes: results from the Melbourne Collaborative Cohort Study and a meta-analysis of prospective studies. *Am J Clin Nutr* 2016;104(5):1352-65. doi: 10.3945/ajcn.116.140954
210. Baliunas DO, Taylor BJ, Irving H, et al. Alcohol as a Risk Factor for Type 2 Diabetes A systematic review and meta-analysis. *Diabetes Care* 2009;32(11) doi: <Go to ISI>://WOS:000271682800035
211. Carlsson S, Hammar N, Grill V. Alcohol consumption and type 2 diabetes Meta-analysis of epidemiological studies indicates a U-shaped relationship. *Diabetologia* 2005;48(6) doi: 10.1007/s00125-005-1768-5. Epub 2005 Apr 30.
212. Knott C, Bell S, Britton A. Alcohol Consumption and the Risk of Type 2 Diabetes: A Systematic Review and Dose-Response Meta-analysis of More Than 1.9 Million Individuals From 38 Observational Studies. *Diabetes Care* 2015;38(9) doi: <Go to ISI>://WOS:000363416500036

213. Koppes LL, Dekker JM, Hendriks HF, et al. Moderate alcohol consumption lowers the risk of type 2 diabetes: a meta-analysis of prospective observational studies. *Diabetes Care* 2005;28(3)
214. Bidel Z, Teymoori F, Davari SJ, et al. Potato consumption and risk of type 2 diabetes: A dose-response meta-analysis of cohort studies. *Clin Nutr ESPEN* 2018;27:86-91. doi: 10.1016/j.clnesp.2018.06.004
215. Fakhri Y, Moradi M, Mohseni S, et al. ASSOCIATION BETWEEN TEA CONSUMPTION WITH RISK OF TYPE 2 DIABETES; SYSTEMATIC REVIEW AND META-ANALYSIS OF 14 COHORT STUDIES UPDATE TO JUNE 2016. *International Journal Of Pharmacy & Technology* 2016;8(2):3903-15.
216. Maghsoudi Z, Ghasvand R, Salehi-Abargouei A. Empirically derived dietary patterns and incident type 2 diabetes mellitus: a systematic review and meta-analysis on prospective observational studies. *Public Health Nutr* 2016;19(2):230-41. doi: 10.1017/S1368980015001251
217. Xu H, Luo J, Huang J, et al. Flavonoids intake and risk of type 2 diabetes mellitus: A meta-analysis of prospective cohort studies. *Medicine (Baltimore)* 2018;97(19):e0686. doi: 10.1097/MD.00000000000010686
218. Esposito K, Chiodini P, Maiorino MI, et al. Which diet for prevention of type 2 diabetes? A meta-analysis of prospective studies. *Endocrine* 2014;47(1):107-16. doi: 10.1007/s12020-014-0264-4
219. Alhazmi A, Stojanovski E, McEvoy M, et al. The association between dietary patterns and type 2 diabetes: a systematic review and meta-analysis of cohort studies. *J Hum Nutr Diet* 2014;27(3):251-60. doi: 10.1111/jhn.12139
220. Schwingshackl L, Bogensberger B, Hoffmann G. Diet Quality as Assessed by the Healthy Eating Index, Alternate Healthy Eating Index, Dietary Approaches to Stop Hypertension Score, and Health Outcomes: An Updated Systematic Review and Meta-Analysis of Cohort Studies. *J Acad Nutr Diet* 2018;118(1):74-100 e11. doi: 10.1016/j.jand.2017.08.024
221. Koloverou E, Esposito K, Giugliano D, et al. The effect of Mediterranean diet on the development of type 2 diabetes mellitus: a meta-analysis of 10 prospective studies and 136,846 participants. *Metabolism* 2014;63(7):903-11. doi: 10.1016/j.metabol.2014.04.010
222. Lee Y, Park K. Adherence to a Vegetarian Diet and Diabetes Risk: A Systematic Review and Meta-Analysis of Observational Studies. *Nutrients* 2017;9(6) doi: 10.3390/nu9060603
223. Namazi N, Larijani B, Azadbakht L. Low-Carbohydrate-Diet Score and its Association with the Risk of Diabetes: A Systematic Review and Meta-Analysis of Cohort Studies. *Horm Metab Res* 2017;49(8):565-71. doi: 10.1055/s-0043-112347
224. Bi H, Gan Y, Yang C, et al. Breakfast skipping and the risk of type 2 diabetes: a meta-analysis of observational studies. *Public Health Nutr* 2015;18(16):3013-9. doi: 10.1017/S1368980015000257
225. Bhupathiraju SN, Tobias DK, Malik VS, et al. Glycemic index, glycemic load, and risk of type 2 diabetes: results from 3 large US cohorts and an updated meta-analysis. *Am J Clin Nutr* 2014;100(1):218-32. doi: 10.3945/ajcn.113.079533
226. Schwingshackl L, Hoffmann G, Lampousi AM, et al. Food groups and risk of type 2 diabetes mellitus: a systematic review and meta-analysis of prospective studies. *Eur J Epidemiol* 2017;32(5):363-75. doi: 10.1007/s10654-017-0246-y
227. Gijsbers L, Ding EL, Malik VS, et al. Consumption of dairy foods and diabetes incidence: a dose-response meta-analysis of observational studies. *Am J Clin Nutr* 2016;103(4):1111-24. doi: 10.3945/ajcn.115.123216
228. Aune D, Norat T, Romundstad P, et al. Dairy products and the risk of type 2 diabetes: a systematic review and dose-response meta-analysis of cohort studies. *Am J Clin Nutr* 2013;98(4):1066-83. doi: 10.3945/ajcn.113.059030
229. Gao D, Ning N, Wang C, et al. Dairy products consumption and risk of type 2 diabetes: systematic review and dose-response meta-analysis. *PLoS One* 2013;8(9):e73965. doi: 10.1371/journal.pone.0073965
230. Yuan S, Li X, Jin Y, et al. Chocolate Consumption and Risk of Coronary Heart Disease, Stroke, and Diabetes: A Meta-Analysis of Prospective Studies. *Nutrients* 2017;9(7) doi: 10.3390/nu9070688

231. Feskens EJ, Sluik D, van Woudenberg GJ. Meat consumption, diabetes, and its complications. *Curr Diab Rep* 2013;13(2):298-306. doi: 10.1007/s11892-013-0365-0
232. Aune D, Ursin G, Veierod MB. Meat consumption and the risk of type 2 diabetes: a systematic review and meta-analysis of cohort studies. *Diabetologia* 2009;52(11):2277-87. doi: 10.1007/s00125-009-1481-x
233. Micha R, Wallace SK, Mozaffarian D. Red and processed meat consumption and risk of incident coronary heart disease, stroke, and diabetes mellitus: a systematic review and meta-analysis. *Circulation* 2010;121(21):2271-83. doi: 10.1161/CIRCULATIONAHA.109.924977
234. Pan A, Sun Q, Bernstein AM, et al. Red meat consumption and risk of type 2 diabetes: 3 cohorts of US adults and an updated meta-analysis. *Am J Clin Nutr* 2011;94(4):1088-96. doi: 10.3945/ajcn.111.018978
235. Zhang M, Picard-Deland E, Marette A. Fish and marine omega-3 polyunsaturated Fatty Acid consumption and incidence of type 2 diabetes: a systematic review and meta-analysis. *Int J Endocrinol* 2013;2013:501015. doi: 10.1155/2013/501015
236. Pimpin L, Wu JH, Haskelberg H, et al. Is Butter Back? A Systematic Review and Meta-Analysis of Butter Consumption and Risk of Cardiovascular Disease, Diabetes, and Total Mortality. *PLoS One* 2016;11(6):e0158118. doi: 10.1371/journal.pone.0158118
237. Schwingshackl L, Lampousi AM, Portillo MP, et al. Olive oil in the prevention and management of type 2 diabetes mellitus: a systematic review and meta-analysis of cohort studies and intervention trials. *Nutr Diabetes* 2017;7(4):e262. doi: 10.1038/nutd.2017.12
238. Schwingshackl L, Schwedhelm C, Hoffmann G, et al. Potatoes and risk of chronic disease: a systematic review and dose-response meta-analysis. *Eur J Nutr* 2018 doi: 10.1007/s00394-018-1774-2
239. Aune D, Norat T, Romundstad P, et al. Whole grain and refined grain consumption and the risk of type 2 diabetes: a systematic review and dose-response meta-analysis of cohort studies. *Eur J Epidemiol* 2013;28(11):845-58. doi: 10.1007/s10654-013-9852-5
240. Saneei P, Larijani B, Esmailzadeh A. Rice consumption, incidence of chronic diseases and risk of mortality: meta-analysis of cohort studies. *Public Health Nutr* 2017;20(2):233-44. doi: 10.1017/S1368980016002172
241. Tian S, Xu Q, Jiang R, et al. Dietary Protein Consumption and the Risk of Type 2 Diabetes: A Systematic Review and Meta-Analysis of Cohort Studies. *Nutrients* 2017;9(9) doi: 10.3390/nu9090982
242. Li M, Fan Y, Zhang X, et al. Fruit and vegetable intake and risk of type 2 diabetes mellitus: meta-analysis of prospective cohort studies. *BMJ Open* 2014;4(11):e005497. doi: 10.1136/bmjopen-2014-005497
243. Guo X, Yang B, Tan J, et al. Associations of dietary intakes of anthocyanins and berry fruits with risk of type 2 diabetes mellitus: a systematic review and meta-analysis of prospective cohort studies. *Eur J Clin Nutr* 2016;70(12):1360-67. doi: 10.1038/ejcn.2016.142
244. Jia X, Zhong L, Song Y, et al. Consumption of citrus and cruciferous vegetables with incident type 2 diabetes mellitus based on a meta-analysis of prospective study. *Prim Care Diabetes* 2016;10(4):272-80. doi: 10.1016/j.pcd.2015.12.004
245. Guo XF, Yang B, Tang J, et al. Apple and pear consumption and type 2 diabetes mellitus risk: a meta-analysis of prospective cohort studies. *Food Funct* 2017;8(3):927-34. doi: 10.1039/c6fo01378c
246. Chen GC, Koh WP, Yuan JM, et al. Green leafy and cruciferous vegetable consumption and risk of type 2 diabetes: results from the Singapore Chinese Health Study and meta-analysis. *Br J Nutr* 2018;1-11. doi: 10.1017/S0007114518000119
247. Wang PY, Fang JC, Gao ZH, et al. Higher intake of fruits, vegetables or their fiber reduces the risk of type 2 diabetes: A meta-analysis. *J Diabetes Investig* 2016;7(1):56-69. doi: 10.1111/jdi.12376
248. Yang WS, Wang WY, Fan WY, et al. Tea consumption and risk of type 2 diabetes: a dose-response meta-analysis of cohort studies. *Br J Nutr* 2014;111(8):1329-39. doi: 10.1017/S0007114513003887

249. Carlstrom M, Larsson SC. Coffee consumption and reduced risk of developing type 2 diabetes: a systematic review with meta-analysis. *Nutr Rev* 2018 doi: 10.1093/nutrit/nuy014
250. Ding M, Bhupathiraju SN, Chen M, et al. Caffeinated and decaffeinated coffee consumption and risk of type 2 diabetes: a systematic review and a dose-response meta-analysis. *Diabetes Care* 2014;37(2):569-86. doi: 10.2337/dc13-1203
251. Imamura F, O'Connor L, Ye Z, et al. Consumption of sugar sweetened beverages, artificially sweetened beverages, and fruit juice and incidence of type 2 diabetes: systematic review, meta-analysis, and estimation of population attributable fraction. *BMJ* 2015;351:h3576. doi: 10.1136/bmj.h3576
252. Xi B, Li S, Liu Z, et al. Intake of fruit juice and incidence of type 2 diabetes: a systematic review and meta-analysis. *PLoS One* 2014;9(3):e93471. doi: 10.1371/journal.pone.0093471
253. Huang J, Wang X, Zhang Y. Specific types of alcoholic beverage consumption and risk of type 2 diabetes: A systematic review and meta-analysis. *J Diabetes Investig* 2017;8(1):56-68. doi: 10.1111/jdi.12537
254. Zhao LG, Zhang QL, Liu XL, et al. Dietary protein intake and risk of type 2 diabetes: a dose-response meta-analysis of prospective studies. *Eur J Nutr* 2018 doi: 10.1007/s00394-018-1737-7
255. Jayedi A, Shab-Bidar S. Dietary acid load and risk of type 2 diabetes: A systematic review and dose-response meta-analysis of prospective observational studies. *Clin Nutr ESPEN* 2018;23:10-18. doi: 10.1016/j.clnesp.2017.12.005
256. Alhazmi A, Stojanovski E, McEvoy M, et al. Macronutrient intakes and development of type 2 diabetes: a systematic review and meta-analysis of cohort studies. *J Am Coll Nutr* 2012;31(4):243-58.
257. Zhou Y, Tian C, Jia C. Association of fish and n-3 fatty acid intake with the risk of type 2 diabetes: a meta-analysis of prospective studies. *Br J Nutr* 2012;108(3):408-17. doi: 10.1017/S0007114512002036
258. Wu JH, Micha R, Imamura F, et al. Omega-3 fatty acids and incident type 2 diabetes: a systematic review and meta-analysis. *Br J Nutr* 2012;107 Suppl 2:S214-27. doi: 10.1017/S0007114512001602
259. de Souza RJ, Mente A, Maroleanu A, et al. Intake of saturated and trans unsaturated fatty acids and risk of all cause mortality, cardiovascular disease, and type 2 diabetes: systematic review and meta-analysis of observational studies. *BMJ* 2015;351:h3978. doi: 10.1136/bmj.h3978
260. Tajima R, Kodama S, Hirata M, et al. High cholesterol intake is associated with elevated risk of type 2 diabetes mellitus - a meta-analysis. *Clin Nutr* 2014;33(6):946-50. doi: 10.1016/j.clnu.2014.03.001
261. Tsilas CS, de Souza RJ, Mejia SB, et al. Relation of total sugars, fructose and sucrose with incident type 2 diabetes: a systematic review and meta-analysis of prospective cohort studies. *CMAJ* 2017;189(20):E711-E20. doi: 10.1503/cmaj.160706
262. InterAct C. Dietary fibre and incidence of type 2 diabetes in eight European countries: the EPIC-InterAct Study and a meta-analysis of prospective studies. *Diabetologia* 2015;58(7):1394-408. doi: 10.1007/s00125-015-3585-9
263. Zhao LM, Tian XQ, Ge JP, et al. Vitamin D intake and type 2 diabetes risk: a meta-analysis of prospective cohort studies. *Afr Health Sci* 2013;13(4):1130-8. doi: 10.4314/ahs.v13i4.38
264. Bao W, Rong Y, Rong S, et al. Dietary iron intake, body iron stores, and the risk of type 2 diabetes: a systematic review and meta-analysis. *BMC Med* 2012;10:119. doi: 10.1186/1741-7015-10-119
265. Fang X, Wang K, Han D, et al. Dietary magnesium intake and the risk of cardiovascular disease, type 2 diabetes, and all-cause mortality: a dose-response meta-analysis of prospective cohort studies. *BMC Med* 2016;14(1):210. doi: 10.1186/s12916-016-0742-z
266. Dong JY, Qin LQ. Dietary calcium intake and risk of type 2 diabetes: possible confounding by magnesium. *Eur J Clin Nutr* 2012;66(3):408-10. doi: 10.1038/ejcn.2012.5
267. Rienks J, Barbaresko J, Oluwagbemigun K, et al. Polyphenol exposure and risk of type 2 diabetes: dose-response meta-analyses and systematic review of prospective cohort studies. *Am J Clin Nutr* 2018;108(1):49-61. doi: 10.1093/ajcn/nqy083



268. Hamer M, Chida Y. Intake of fruit, vegetables, and antioxidants and risk of type 2 diabetes: systematic review and meta-analysis. *J Hypertens* 2007;25(12):2361-9. doi: 10.1097/HJH.0b013e3282efc214
